# Supplementary material for: Analysis of the whole serum proteome using an integrated 2D LC-MS/MS system
Source: Royal Society of Chemistry journal article supplement (doi:10.1039/c4ay01274g), 2014-01-01
Supplement: c4ay01274g1.pdf [file c4ay01274g1.pdf]

**Table S1.** List of proteins detected in the control serum.

| Accession         | # AAs | MW [kDa] | calc. pI | Description                                                                   | Score A2 | #Peptides | Score B2 | #Peptides |
|-------------------|-------|----------|----------|-------------------------------------------------------------------------------|----------|-----------|----------|-----------|
| IPI:IPI00022229.2 | 4563  | 515.3    | 7.05     | Apolipoprotein B-100                                                          | 941.44   | 74        | 731.37   | 67        |
| IPI:IPI00783987.2 | 1663  | 187.0    | 6.40     | Complement C3 (Fragment)                                                      | 1539.86  | 70        | 1169.39  | 62        |
| IPI:IPI01014270.1 | 4344  | 489.5    | 7.15     | Mutant Apo B 100                                                              | 878.63   | 70        | 668.81   | 63        |
| IPI:IPI00745872.2 | 609   | 69.3     | 6.28     | Isoform 1 of Serum albumin                                                    | 14749.45 | 58        | 12602.10 | 54        |
| IPI:IPI00478003.3 | 1474  | 163.2    | 6.46     | Alpha-2-macroglobulin                                                         | 2244.63  | 54        | 1792.47  | 59        |
| IPI:IPI00022434.4 | 627   | 71.7     | 6.73     | Uncharacterized protein                                                       | 14084.98 | 54        | 12102.86 | 51        |
| IPI:IPI00908876.1 | 523   | 59.5     | 7.17     | cDNA FLJ50830, highly similar to Serum albumin                                | 12769.86 | 46        | 10607.74 | 42        |
| IPI:IPI00022463.2 | 698   | 77.0     | 7.12     | Serotransferrin                                                               | 1527.31  | 46        | 1728.45  | 42        |
| IPI:IPI00878517.1 | 494   | 56.2     | 7.14     | Uncharacterized protein                                                       | 11577.02 | 43        | 10088.81 | 40        |
| IPI:IPI00965074.1 | 459   | 52.0     | 6.84     | Uncharacterized protein                                                       | 11451.50 | 42        | 9913.61  | 38        |
| IPI:IPI00643525.1 | 1744  | 192.6    | 7.08     | Uncharacterized protein                                                       | 476.49   | 34        | 353.23   | 29        |
| IPI:IPI01012744.1 | 1698  | 187.6    | 7.12     | C4A protein                                                                   | 462.47   | 32        | 328.22   | 28        |
| IPI:IPI00032258.4 | 1744  | 192.7    | 7.08     | Complement C4-A                                                               | 456.79   | 32        | 347.91   | 28        |
| IPI:IPI00940872.2 | 34942 | 3878.8   | 6.38     | Titin, isoform CRA_a                                                          | 617.25   | 25        | 496.95   | 18        |
| IPI:IPI00553177.1 | 418   | 46.7     | 5.59     | Isoform 1 of Alpha-1-antitrypsin                                              | 1273.72  | 24        | 912.05   | 24        |
| IPI:IPI00641737.2 | 406   | 45.2     | 6.58     | Haptoglobin                                                                   | 861.82   | 22        | 751.33   | 19        |
| IPI:IPI00021841.1 | 267   | 30.8     | 5.76     | Apolipoprotein A-I                                                            | 588.09   | 20        | 481.32   | 17        |
| IPI:IPI00896413.1 | 900   | 99.8     | 6.47     | inter-alpha-trypsin inhibitor heavy chain H4 isoform 2 precursor              | 299.41   | 20        | 209.97   | 15        |
| IPI:IPI00017601.1 | 1065  | 122.1    | 5.72     | Ceruloplasmin                                                                 | 288.16   | 19        | 308.42   | 22        |
| IPI:IPI00019591.2 | 1266  | 140.9    | 7.18     | cDNA FLJ55673, highly similar to Complement factor B                          | 170.27   | 18        | 140.86   | 18        |
| IPI:IPI00785084.2 | 465   | 51.1     | 8.69     | IGH@ protein                                                                  | 3089.47  | 18        | 2206.44  | 13        |
| IPI:IPI00930124.1 | 473   | 52.1     | 7.58     | Putative uncharacterized protein DKFZp686C11235                               | 3052.20  | 18        | 2214.66  | 15        |
| IPI:IPI00784842.1 | 475   | 52.0     | 8.06     | Putative uncharacterized protein DKFZp686G11190                               | 2927.57  | 18        | 2098.26  | 14        |
| IPI:IPI00645363.2 | 472   | 51.7     | 7.93     | Putative uncharacterized protein DKFZp686P15220                               | 3016.07  | 18        | 2199.72  | 15        |
| IPI:IPI00022488.1 | 462   | 51.6     | 7.02     | Hemopexin                                                                     | 529.13   | 17        | 369.36   | 15        |
| IPI:IPI00029739.5 | 1231  | 139.0    | 6.61     | Isoform 1 of Complement factor H                                              | 181.71   | 17        | 120.51   | 14        |
| IPI:IPI00816314.1 | 466   | 50.9     | 8.06     | Putative uncharacterized protein DKFZp686I15196                               | 2960.46  | 17        | 2116.13  | 14        |
| IPI:IPI00384938.1 | 482   | 52.8     | 8.48     | Putative uncharacterized protein DKFZp686N02209                               | 2928.42  | 17        | 2107.50  | 13        |
| IPI:IPI00784817.1 | 475   | 52.3     | 8.35     | Anti-RhD monoclonal T125 gamma1 heavy chain                                   | 2982.58  | 16        | 2187.01  | 14        |
| IPI:IPI00423466.1 | 481   | 52.7     | 8.48     | Putative uncharacterized protein DKFZp686H20196                               | 2901.33  | 16        | 2094.25  | 14        |
| IPI:IPI00423464.1 | 475   | 52.3     | 8.57     | Putative uncharacterized protein DKFZp686K03196                               | 2200.35  | 16        | 1820.69  | 12        |
| IPI:IPI00939824.1 | 1266  | 140.9    | 7.06     | Uncharacterized protein                                                       | 154.66   | 16        | 138.64   | 17        |
| IPI:IPI00032179.3 | 464   | 52.6     | 6.71     | Antithrombin-III                                                              | 220.05   | 15        | 146.12   | 10        |
| IPI:IPI00142768.5 | 7246  | 821.5    | 5.22     | Isoform 4 of Dystonin                                                         | 497.54   | 15        | 320.82   | 13        |
| IPI:IPI01014157.1 | 645   | 72.1     | 7.68     | cDNA FLJ56954, highly similar to Inter-alpha-trypsin inhibitor heavy chain H1 | 233.58   | 14        | 111.60   | 10        |
| IPI:IPI00168728.1 | 509   | 56.1     | 7.59     | FLJ00385 protein (Fragment)                                                   | 1171.40  | 14        | 876.58   | 11        |

|                   |      |       |      |                                                                                                  |         |    |         |    |
|-------------------|------|-------|------|--------------------------------------------------------------------------------------------------|---------|----|---------|----|
| IPI:IPI00479708.6 | 375  | 41.2  | 6.79 | Full-length cDNA clone CSODD006YL02 of Neuroblastoma of Homo sapiens                             | 370.47  | 14 | 342.49  | 13 |
| IPI:IPI00479723.5 | 2176 | 239.5 | 5.88 | Isoform 10 of Fibronectin                                                                        | 124.08  | 14 | 101.86  | 10 |
| IPI:IPI00896380.1 | 473  | 51.8  | 6.15 | Isoform 2 of Ig mu chain C region                                                                | 360.40  | 14 | 342.83  | 15 |
| IPI:IPI00399007.7 | 417  | 46.0  | 7.59 | Putative uncharacterized protein DKFZp686I04196 (Fragment)                                       | 1798.79 | 14 | 1117.28 | 11 |
| IPI:IPI00555812.5 | 474  | 52.9  | 5.45 | vitamin D-binding protein isoform 1 precursor                                                    | 291.94  | 14 | 200.75  | 11 |
| IPI:IPI00892671.1 | 295  | 32.0  | 8.03 | 32 kDa protein                                                                                   | 2122.28 | 13 | 1850.25 | 12 |
| IPI:IPI00386879.1 | 494  | 53.1  | 6.86 | cDNA FLJ14473 fis, clone MAMMA1001080, highly similar to Homo sapiens SNC73 protein (SNC73) mRNA | 509.38  | 13 | 651.51  | 13 |
| IPI:IPI00385264.1 | 391  | 43.0  | 5.24 | Ig mu heavy chain disease protein                                                                | 289.29  | 13 | 279.36  | 12 |
| IPI:IPI00645038.1 | 935  | 105.2 | 7.03 | Inter-alpha (Globulin) inhibitor H2                                                              | 267.82  | 13 | 113.16  | 7  |
| IPI:IPI00477597.2 | 348  | 39.0  | 7.09 | Isoform 1 of Haptoglobin-related protein                                                         | 551.63  | 13 | 404.75  | 12 |
| IPI:IPI00426051.3 | 464  | 51.1  | 7.71 | Putative uncharacterized protein DKFZp686C15213                                                  | 1825.16 | 13 | 1499.43 | 13 |
| IPI:IPI01012492.1 | 415  | 46.5  | 6.43 | cDNA FLJ53075, highly similar to Kininogen-1                                                     | 121.48  | 12 | 117.42  | 12 |
| IPI:IPI00855998.1 | 3210 | 367.5 | 5.07 | Centromere protein F                                                                             | 421.53  | 12 | 158.71  | 6  |
| IPI:IPI00019568.1 | 622  | 70.0  | 5.90 | Prothrombin (Fragment)                                                                           | 169.42  | 12 | 155.07  | 13 |
| IPI:IPI00889723.3 | 270  | 30.4  | 7.99 | cDNA FLJ53025, highly similar to Complement C4-B                                                 | 129.61  | 11 | 113.86  | 10 |
| IPI:IPI00922213.2 | 1014 | 111.2 | 6.21 | cDNA FLJ53292, highly similar to Homo sapiens fibronectin 1 (FN1), transcript variant 5, mRNA    | 108.00  | 11 | 60.30   | 5  |
| IPI:IPI00022895.8 | 495  | 54.2  | 5.86 | Isoform 1 of Alpha-1B-glycoprotein                                                               | 262.08  | 11 | 189.01  | 10 |
| IPI:IPI00423462.5 | 519  | 56.4  | 6.93 | Putative uncharacterized protein DKFZp686K18196 (Fragment)                                       | 498.25  | 11 | 643.84  | 11 |
| IPI:IPI00298828.3 | 345  | 38.3  | 7.97 | Beta-2-glycoprotein 1                                                                            | 111.50  | 10 | 142.41  | 10 |
| IPI:IPI00556459.2 | 448  | 49.7  | 6.54 | cDNA FLJ58564, highly similar to Plasma protease C1 inhibitor                                    | 117.10  | 10 | 112.58  | 8  |
| IPI:IPI00646773.2 | 731  | 80.6  | 5.85 | Isoform 2 of Gelsolin                                                                            | 95.23   | 10 | 52.34   | 6  |
| IPI:IPI00930072.1 | 470  | 51.5  | 7.56 | Putative uncharacterized protein DKFZp686E23209                                                  | 1841.90 | 10 | 1118.53 | 8  |
| IPI:IPI00022432.1 | 147  | 15.9  | 5.76 | Transthyretin                                                                                    | 355.73  | 10 | 165.34  | 5  |
| IPI:IPI01018278.1 | 4959 | 563.7 | 6.28 | Uncharacterized protein                                                                          | 216.20  | 10 | 117.54  | 4  |
| IPI:IPI00953689.1 | 367  | 39.3  | 5.72 | Alpha-2-HS-glycoprotein                                                                          | 638.51  | 9  | 337.46  | 7  |
| IPI:IPI00784985.1 | 235  | 25.5  | 6.55 | IGK@ protein                                                                                     | 2076.56 | 9  | 1099.44 | 8  |
| IPI:IPI00784865.1 | 236  | 25.8  | 6.33 | IGK@ protein                                                                                     | 2005.99 | 9  | 1063.68 | 8  |
| IPI:IPI00847635.1 | 423  | 47.6  | 5.52 | Isoform 1 of Alpha-1-antichymotrypsin                                                            | 203.79  | 9  | 279.28  | 11 |
| IPI:IPI00180384.5 | 4024 | 460.9 | 6.00 | Isoform 1 of Dynein heavy chain 7, axonemal                                                      | 269.99  | 9  | 118.92  | 5  |
| IPI:IPI00303335.3 | 6669 | 772.4 | 9.07 | Nebulin                                                                                          | 269.06  | 9  | 219.92  | 5  |
| IPI:IPI00550731.2 | 239  | 26.2  | 8.06 | Putative uncharacterized protein                                                                 | 2001.36 | 9  | 1066.99 | 8  |

|                   |      |        |      |                                                                                        |         |   |        |    |
|-------------------|------|--------|------|----------------------------------------------------------------------------------------|---------|---|--------|----|
| IPI:IPI00930442.1 | 476  | 52.4   | 7.77 | Putative uncharacterized protein DKFZp686M24218                                        | 1028.01 | 9 | 867.32 | 11 |
| IPI:IPI00647370.2 | 8749 | 1004.6 | 5.53 | Uncharacterized protein                                                                | 518.14  | 9 | 315.32 | 7  |
| IPI:IPI00022429.3 | 201  | 23.5   | 5.02 | Alpha-1-acid glycoprotein 1                                                            | 332.24  | 8 | 279.82 | 6  |
| IPI:IPI00784830.1 | 487  | 52.8   | 5.92 | cDNA FLJ41981 fis, clone SMINT2011888, highly similar to Protein Tro alpha 1 H,myeloma | 376.80  | 8 | 491.12 | 10 |
| IPI:IPI00879709.3 | 943  | 105.7  | 6.79 | Complement component C6 precursor                                                      | 93.37   | 8 | 37.02  | 5  |
| IPI:IPI00022371.1 | 525  | 59.5   | 7.50 | Histidine-rich glycoprotein                                                            | 66.74   | 8 | 76.21  | 7  |
| IPI:IPI00929313.1 | 7081 | 801.4  | 8.79 | hypothetical protein LOC643677                                                         | 260.71  | 8 | 182.03 | 6  |
| IPI:IPI00785067.1 | 480  | 52.0   | 6.32 | IGH@ protein                                                                           | 345.81  | 8 | 467.91 | 9  |
| IPI:IPI00154742.6 | 234  | 24.8   | 6.37 | IGL@ protein                                                                           | 744.34  | 8 | 489.85 | 6  |
| IPI:IPI00940245.1 | 416  | 44.8   | 6.13 | Immunoglobulin heavy chain variant (Fragment)                                          | 321.88  | 8 | 465.37 | 9  |
| IPI:IPI00291262.3 | 449  | 52.5   | 6.27 | Isoform 1 of Clusterin                                                                 | 96.29   | 8 | 91.43  | 8  |
| IPI:IPI01009738.1 | 2223 | 260.2  | 5.40 | Isoform 3 of Golgin subfamily A member 4                                               | 188.06  | 8 | 150.67 | 8  |
| IPI:IPI00220627.1 | 3857 | 447.5  | 4.98 | Isoform 5 of A-kinase anchor protein 9                                                 | 214.53  | 8 | 187.35 | 10 |
| IPI:IPI00827875.1 | 235  | 24.6   | 7.62 | Lambda-chain                                                                           | 724.18  | 8 | 486.68 | 6  |
| IPI:IPI00784950.1 | 479  | 51.6   | 5.77 | Putative uncharacterized protein DKFZp686L19235                                        | 325.06  | 8 | 463.12 | 9  |
| IPI:IPI00784758.1 | 483  | 52.2   | 5.29 | Putative uncharacterized protein DKFZp686M08189                                        | 371.28  | 8 | 484.74 | 9  |
| IPI:IPI01015266.1 | 498  | 54.1   | 7.18 | Putative uncharacterized protein DKFZp686O16217 (Fragment)                             | 257.99  | 8 | 342.49 | 7  |
| IPI:IPI00394855.5 | 3096 | 351.7  | 8.10 | Uncharacterized protein                                                                | 201.13  | 8 | 137.83 | 4  |
| IPI:IPI00020091.1 | 201  | 23.6   | 5.11 | Alpha-1-acid glycoprotein 2                                                            | 135.47  | 7 | 108.77 | 4  |
| IPI:IPI00021854.1 | 100  | 11.2   | 6.62 | Apolipoprotein A-II                                                                    | 202.46  | 7 | 119.95 | 4  |
| IPI:IPI00304273.2 | 396  | 45.4   | 5.38 | Apolipoprotein A-IV                                                                    | 72.97   | 7 | 72.98  | 9  |
| IPI:IPI00032291.2 | 1676 | 188.2  | 6.52 | Complement C5                                                                          | 87.82   | 7 | 75.50  | 7  |
| IPI:IPI00022395.1 | 559  | 63.1   | 5.59 | Complement component C9                                                                | 94.31   | 7 | 42.03  | 5  |
| IPI:IPI00031627.4 | 1970 | 217.0  | 7.37 | DNA-directed RNA polymerase II subunit RPB1                                            | 100.09  | 7 | 52.38  | 2  |
| IPI:IPI00410714.5 | 142  | 15.2   | 8.68 | Hemoglobin subunit alpha                                                               | 124.03  | 7 | 79.35  | 5  |
| IPI:IPI00654755.3 | 147  | 16.0   | 7.28 | Hemoglobin subunit beta                                                                | 132.75  | 7 | 105.13 | 8  |
| IPI:IPI00473011.3 | 147  | 16.0   | 8.05 | Hemoglobin subunit delta                                                               | 114.21  | 7 | 75.05  | 4  |
| IPI:IPI00719373.3 | 234  | 25.1   | 6.67 | IGL@ protein                                                                           | 746.86  | 7 | 486.68 | 6  |
| IPI:IPI00829640.1 | 233  | 24.8   | 6.74 | IGL@ protein                                                                           | 721.07  | 7 | 470.95 | 5  |
| IPI:IPI00744476.6 | 236  | 24.8   | 6.76 | IGL@ protein                                                                           | 713.01  | 7 | 479.54 | 6  |
| IPI:IPI00784201.3 | 2481 | 290.4  | 5.95 | Isoform 1 of Centrosomal protein of 290 kDa                                            | 152.99  | 7 | 167.76 | 5  |
| IPI:IPI00644018.1 | 373  | 40.7   | 5.77 | Isoform 2 of Alpha-1B-glycoprotein                                                     | 222.06  | 7 | 148.87 | 6  |
| IPI:IPI00873959.4 | 1828 | 212.1  | 8.60 | Isoform 2 of Myosin-Va                                                                 | 104.61  | 7 |        |    |
| IPI:IPI00973279.1 | 3139 | 355.7  | 5.47 | Isoform 2 of Pericentrin                                                               | 91.33   | 7 | 95.71  | 4  |
| IPI:IPI00019580.1 | 810  | 90.5   | 7.24 | Plasminogen                                                                            | 111.96  | 7 | 126.46 | 13 |
| IPI:IPI00887169.2 | 236  | 25.0   | 7.69 | Putative uncharacterized protein                                                       | 735.72  | 7 | 469.00 | 7  |
| IPI:IPI00807428.1 | 235  | 24.7   | 5.94 | Putative uncharacterized protein                                                       | 717.16  | 7 | 470.13 | 5  |
| IPI:IPI00973531.1 | 234  | 25.0   | 6.38 | Putative uncharacterized protein                                                       | 705.38  | 7 | 449.30 | 5  |

|                   |      |       |      |                                                       |        |   |        |   |
|-------------------|------|-------|------|-------------------------------------------------------|--------|---|--------|---|
| IPI:IPI00022542.1 | 1354 | 158.1 | 5.90 | Rho-associated protein kinase 1                       | 115.31 | 7 |        |   |
| IPI:IPI00974507.1 | 7388 | 837.8 | 5.39 | Uncharacterized protein                               | 295.99 | 7 | 193.69 | 7 |
| IPI:IPI01010123.1 | 1907 | 213.5 | 4.84 | 214 kDa protein                                       | 68.36  | 6 | 46.86  | 3 |
| IPI:IPI01015899.1 | 2434 | 271.2 | 6.51 | 271 kDa protein                                       | 109.16 | 6 | 95.35  | 2 |
| IPI:IPI00032220.3 | 485  | 53.1  | 6.32 | Angiotensinogen                                       | 87.89  | 6 | 75.48  | 6 |
| IPI:IPI00740057.4 | 1873 | 210.7 | 6.20 | Ankyrin repeat domain-containing protein 31           | 88.81  | 6 |        |   |
| IPI:IPI00304885.2 | 943  | 106.8 | 9.39 | Centromere protein C 1                                | 67.84  | 6 |        |   |
| IPI:IPI00979371.2 | 1935 | 213.1 | 7.28 | DNA-directed RNA polymerase                           | 90.79  | 6 | 59.15  | 3 |
| IPI:IPI00329536.2 | 1411 | 162.4 | 5.68 | Early endosome antigen 1                              | 106.68 | 6 | 67.33  | 3 |
| IPI:IPI00878236.3 | 6996 | 789.4 | 6.68 | fibrous sheath-interacting protein 2                  | 232.35 | 6 | 156.44 | 4 |
| IPI:IPI00829896.1 | 105  | 11.5  | 6.68 | Hemoglobin Lepore-Baltimore (Fragment)                | 85.89  | 6 | 61.97  | 4 |
| IPI:IPI00815832.5 | 1405 | 161.5 | 8.15 | Isoform 1 of Centlein                                 | 72.54  | 6 | 97.50  | 6 |
| IPI:IPI00788188.3 | 4307 | 492.3 | 6.54 | Isoform 1 of Cytoplasmic dynein 2 heavy chain 1       | 168.37 | 6 | 194.27 | 4 |
| IPI:IPI01011132.1 | 1531 | 174.3 | 8.72 | Isoform 1 of DNA topoisomerase 2-alpha                | 50.39  | 6 | 65.35  | 5 |
| IPI:IPI00783464.3 | 4427 | 507.4 | 6.37 | Isoform 1 of Dynein heavy chain 2, axonemal           | 199.32 | 6 | 84.51  | 5 |
| IPI:IPI00874168.1 | 2567 | 285.0 | 6.90 | Isoform 1 of Myosin-XVIIIb                            | 272.90 | 6 | 146.22 | 3 |
| IPI:IPI00436632.1 | 2804 | 315.9 | 7.91 | Isoform 1 of Nipped-B-like protein                    | 75.49  | 6 | 69.71  | 4 |
| IPI:IPI00219754.1 | 1185 | 133.9 | 6.25 | Isoform 2 of Liprin-alpha-1                           | 57.40  | 6 | 79.86  | 2 |
| IPI:IPI00479307.4 | 1992 | 230.6 | 5.57 | Isoform 2 of Myosin-10                                | 115.24 | 6 | 72.42  | 4 |
| IPI:IPI00216704.9 | 2328 | 267.7 | 5.39 | Isoform 2 of Spectrin beta chain, erythrocyte         | 76.55  | 6 |        |   |
| IPI:IPI00955853.2 | 2718 | 304.0 | 7.42 | Isoform 2 of Zinc finger protein 292                  | 90.98  | 6 |        |   |
| IPI:IPI00252944.4 | 1247 | 140.7 | 7.91 | Leucine-rich repeat-containing protein 53             | 52.61  | 6 |        |   |
| IPI:IPI00167941.1 | 5596 | 632.4 | 5.68 | Midasin                                               | 277.67 | 6 | 163.97 | 3 |
| IPI:IPI00300207.3 | 2104 | 236.5 | 6.16 | prematurely terminated mRNA decay factor-like         | 264.00 | 6 | 197.69 | 3 |
| IPI:IPI00552983.6 | 2394 | 247.7 | 5.95 | Protein of unknown function DUF634 family protein     | 126.72 | 6 | 68.30  | 3 |
| IPI:IPI00307155.8 | 1388 | 160.8 | 6.02 | Rho-associated protein kinase 2                       | 105.58 | 6 | 101.93 | 3 |
| IPI:IPI00647832.2 | 2934 | 335.9 | 6.49 | serine-protein kinase ATM-like, partial               | 100.29 | 6 | 74.41  | 5 |
| IPI:IPI00983475.1 | 175  | 18.3  | 8.27 | Similar to Hepatitis B virus receptor binding protein | 122.27 | 6 | 161.52 | 6 |
| IPI:IPI00003515.2 | 1979 | 227.4 | 5.26 | Thyroid receptor-interacting protein 11               | 140.28 | 6 | 94.04  | 2 |
| IPI:IPI00847543.2 | 2925 | 336.0 | 6.76 | TPR and ankyrin repeat-containing protein 1           | 101.61 | 6 | 94.77  | 5 |
| IPI:IPI00982951.1 | 2016 | 227.6 | 5.03 | Uncharacterized protein                               | 61.99  | 6 |        |   |
| IPI:IPI00298971.1 | 478  | 54.3  | 5.80 | Vitronectin                                           | 64.38  | 6 | 43.08  | 3 |
| IPI:IPI00166729.4 | 298  | 34.2  | 6.05 | Zinc-alpha-2-glycoprotein                             | 85.96  | 6 | 63.85  | 7 |
| IPI:IPI01012711.1 | 321  | 35.9  | 7.30 | 36 kDa protein                                        | 75.57  | 5 | 23.61  | 4 |
| IPI:IPI00396310.6 | 1218 | 132.3 | 9.22 | AF4/FMR2 family member 1 isoform 1                    | 55.74  | 5 |        |   |
| IPI:IPI00019943.1 | 599  | 69.0  | 5.90 | Afamin                                                | 105.98 | 5 | 52.73  | 6 |
| IPI:IPI00006662.1 | 189  | 21.3  | 5.15 | Apolipoprotein D                                      | 38.58  | 5 | 29.17  | 4 |
| IPI:IPI00021727.1 | 597  | 67.0  | 7.30 | C4b-binding protein alpha chain                       | 64.62  | 5 | 71.01  | 7 |

|                   |      |       |      |                                                                       |        |   |        |   |
|-------------------|------|-------|------|-----------------------------------------------------------------------|--------|---|--------|---|
| IPI:IPI01010911.1 | 466  | 56.5  | 8.41 | CCDC19 protein                                                        | 48.56  | 5 |        |   |
| IPI:IPI00025204.1 | 347  | 38.1  | 5.47 | CD5 antigen-like                                                      | 29.55  | 5 | 39.48  | 7 |
| IPI:IPI00873175.2 | 1282 | 144.8 | 6.47 | cDNA FLJ56808, highly similar to WD repeat protein 19                 | 50.00  | 5 |        |   |
| IPI:IPI00291867.4 | 583  | 65.7  | 7.50 | Complement factor I                                                   | 83.15  | 5 | 19.15  | 3 |
| IPI:IPI00456969.1 | 4646 | 532.1 | 6.40 | Cytoplasmic dynein 1 heavy chain 1                                    | 95.48  | 5 | 61.10  | 3 |
| IPI:IPI00973204.2 | 232  | 24.8  | 5.59 | IGL@ protein                                                          | 550.20 | 5 | 367.23 | 5 |
| IPI:IPI00877852.2 | 623  | 69.5  | 5.92 | inter-alpha-trypsin inhibitor heavy chain H1 isoform c                | 78.98  | 5 | 30.49  | 5 |
| IPI:IPI00418164.4 | 783  | 91.3  | 5.77 | Isoform 1 of Coiled-coil domain-containing protein 30                 | 61.15  | 5 | 39.54  | 2 |
| IPI:IPI00884996.1 | 4158 | 475.7 | 6.00 | Isoform 1 of Dynein heavy chain 6, axonemal                           | 214.12 | 5 |        |   |
| IPI:IPI00868787.1 | 1990 | 219.5 | 8.07 | Isoform 1 of Protein TANC2                                            | 65.17  | 5 | 38.51  | 3 |
| IPI:IPI00966894.1 | 911  | 105.0 | 9.45 | Isoform 1 of Zinc finger protein 721                                  | 168.93 | 5 | 87.29  | 5 |
| IPI:IPI00376383.2 | 1773 | 205.0 | 5.33 | Isoform 2 of Centriolin                                               | 183.80 | 5 | 159.35 | 2 |
| IPI:IPI00796371.2 | 568  | 67.4  | 6.04 | Isoform 2 of Coiled-coil domain-containing protein 41                 | 36.99  | 5 | 28.15  | 2 |
| IPI:IPI00745230.2 | 3052 | 343.9 | 8.47 | Isoform 2 of DNA polymerase zeta catalytic subunit                    | 71.81  | 5 |        |   |
| IPI:IPI00651691.4 | 4196 | 481.7 | 6.43 | Isoform 2 of Dynein heavy chain 2, axonemal                           | 186.10 | 5 | 78.29  | 5 |
| IPI:IPI00413958.5 | 2692 | 287.1 | 5.97 | Isoform 2 of Filamin-C                                                | 35.00  | 5 |        |   |
| IPI:IPI00554573.1 | 2580 | 294.0 | 7.43 | Isoform 2 of Serine/threonine-protein kinase ATR                      | 80.48  | 5 | 83.35  | 4 |
| IPI:IPI00232806.4 | 1099 | 124.8 | 8.25 | Isoform 2 of Structural maintenance of chromosomes protein 2          | 49.06  | 5 | 67.76  | 2 |
| IPI:IPI00216695.1 | 1479 | 170.3 | 8.48 | Isoform 2 of Tyrosine-protein kinase BAZ1B                            | 79.15  | 5 | 39.01  | 2 |
| IPI:IPI00783859.2 | 4363 | 488.8 | 6.55 | Isoform 2 of Vacuolar protein sorting-associated protein 13D          | 89.61  | 5 | 69.39  | 3 |
| IPI:IPI00940089.1 | 1637 | 188.6 | 6.02 | Isoform 2 of WD repeat-containing protein 96                          | 101.56 | 5 | 109.58 | 3 |
| IPI:IPI00452092.1 | 848  | 96.6  | 6.20 | Isoform 2 of Zinc finger protein DZIP1                                | 65.81  | 5 | 43.04  | 2 |
| IPI:IPI00646605.3 | 5159 | 571.5 | 6.04 | Isoform 3 of E3 ubiquitin-protein ligase UBR4                         | 227.16 | 5 | 168.06 | 5 |
| IPI:IPI00884904.1 | 5695 | 605.3 | 5.36 | Isoform 3 of Protein AHNAK2                                           | 136.61 | 5 | 62.29  | 4 |
| IPI:IPI00930224.1 | 1911 | 221.3 | 5.01 | Isoform 4 of Adenylate kinase domain-containing protein 1             | 55.38  | 5 | 41.74  | 2 |
| IPI:IPI00925578.1 | 4515 | 518.2 | 7.06 | Isoform 4 of Dynein heavy chain 14, axonemal                          | 150.00 | 5 | 113.67 | 5 |
| IPI:IPI00736859.1 | 756  | 84.7  | 8.78 | Isoform 4 of Heterogeneous nuclear ribonucleoprotein U-like protein 1 | 36.67  | 5 |        |   |
| IPI:IPI00479255.3 | 1199 | 137.1 | 6.09 | Isoform 4 of Kinesin-like protein KIF15                               | 183.70 | 5 | 97.70  | 3 |
| IPI:IPI00376404.3 | 2903 | 322.0 | 6.38 | Isoform 4 of Nucleosome-remodeling factor subunit BPTF                | 76.26  | 5 | 66.99  | 3 |
| IPI:IPI00219261.2 | 1129 | 124.2 | 5.76 | Isoform XG of Plasma membrane calcium-transporting ATPase 3           | 98.68  | 5 |        |   |
| IPI:IPI00218725.3 | 3118 | 343.3 | 6.39 | laminin subunit alpha-2 isoform b precursor                           | 86.69  | 5 | 56.10  | 3 |

|                   |      |       |      |                                                                                     |        |   |        |   |
|-------------------|------|-------|------|-------------------------------------------------------------------------------------|--------|---|--------|---|
| IPI:IPI00889133.1 | 3783 | 405.3 | 5.67 | LOW QUALITY PROTEIN:<br>hemicentin-2                                                | 161.83 | 5 | 93.46  | 2 |
| IPI:IPI00024870.1 | 1938 | 223.4 | 5.53 | myosin-11 isoform SM2A                                                              | 78.83  | 5 | 67.14  | 5 |
| IPI:IPI00180408.8 | 1946 | 224.5 | 5.85 | Myosin-15                                                                           | 103.72 | 5 | 91.52  | 4 |
| IPI:IPI00298447.3 | 1621 | 181.6 | 7.05 | Probable methyltransferase<br>TARBP1                                                | 40.29  | 5 | 24.28  | 2 |
| IPI:IPI00940698.2 | 4588 | 506.0 | 5.00 | Protocadherin Fat 1                                                                 | 84.93  | 5 |        |   |
| IPI:IPI00978424.2 | 1197 | 135.7 | 8.15 | putative uncharacterized protein<br>C12orf63                                        | 56.98  | 5 |        |   |
| IPI:IPI00423461.3 | 500  | 54.1  | 6.34 | Putative uncharacterized protein<br>DKFZp686C02220 (Fragment)                       | 194.42 | 5 | 318.38 | 6 |
| IPI:IPI01009380.1 | 1727 | 186.4 | 5.40 | SEC16A protein (Fragment)                                                           | 56.14  | 5 | 23.55  | 3 |
| IPI:IPI00218732.4 | 355  | 39.7  | 5.22 | Serum paraoxonase/arylesterase<br>1                                                 | 91.34  | 5 | 58.16  | 5 |
| IPI:IPI00977788.1 | 176  | 18.4  | 8.27 | Similar to Hepatitis B virus<br>receptor binding protein                            | 337.08 | 5 | 213.57 | 4 |
| IPI:IPI00219168.7 | 3674 | 416.6 | 6.67 | Spectrin beta chain, brain 4                                                        | 102.85 | 5 | 82.34  | 2 |
| IPI:IPI00216137.4 | 976  | 114.1 | 5.96 | Synaptonemal complex protein 1                                                      | 106.58 | 5 | 75.54  | 3 |
| IPI:IPI00306718.3 | 1530 | 175.5 | 8.85 | Synaptonemal complex protein 2                                                      | 73.35  | 5 | 54.71  | 3 |
| IPI:IPI00965382.1 | 145  | 16.1  | 5.83 | Uncharacterized protein                                                             | 79.49  | 5 | 46.24  | 2 |
| IPI:IPI00939967.1 | 5606 | 631.4 | 5.74 | Uncharacterized protein                                                             | 113.23 | 5 | 78.51  | 4 |
| IPI:IPI00980545.1 | 1127 | 127.1 | 5.11 | Uncharacterized protein                                                             | 73.12  | 5 | 45.59  | 2 |
| IPI:IPI00555610.4 | 2960 | 312.2 | 6.70 | Uncharacterized protein                                                             | 111.44 | 5 | 111.52 | 2 |
| IPI:IPI00967340.1 | 2575 | 286.8 | 5.52 | Uncharacterized protein                                                             | 59.94  | 5 |        |   |
| IPI:IPI00513788.2 | 1403 | 161.4 | 6.93 | uveal autoantigen with coiled-<br>coil domains and ankyrin repeats<br>isoform 2     | 98.23  | 5 | 77.26  | 2 |
| IPI:IPI01011955.1 | 3255 | 358.4 | 9.42 | 359 kDa protein                                                                     | 118.13 | 4 | 70.89  | 3 |
| IPI:IPI00552749.5 | 4176 | 477.3 | 6.18 | 478 kDa protein                                                                     | 134.72 | 4 | 80.97  | 5 |
| IPI:IPI00385294.5 | 521  | 57.5  | 5.45 | 58 kDa protein                                                                      | 55.80  | 4 | 72.00  | 2 |
| IPI:IPI01011395.1 | 800  | 89.5  | 5.67 | 90 kDa protein                                                                      | 74.39  | 4 | 41.40  | 2 |
| IPI:IPI00294840.6 | 1723 | 188.6 | 5.86 | Absent in melanoma 1 protein                                                        | 67.30  | 4 | 54.52  | 2 |
| IPI:IPI00873029.1 | 1210 | 131.3 | 9.20 | AF4/FMR2 family member 1                                                            | 55.38  | 4 | 41.70  | 2 |
| IPI:IPI00796123.3 | 4186 | 453.0 | 6.83 | Anchor protein                                                                      | 73.34  | 4 | 45.50  | 2 |
| IPI:IPI00479761.1 | 1460 | 165.8 | 6.19 | Ankyrin repeat domain 30A                                                           | 101.71 | 4 | 70.68  | 2 |
| IPI:IPI00916434.1 | 238  | 25.1  | 8.12 | Anti-(ED-B) scFV (Fragment)                                                         | 260.77 | 4 | 127.52 | 4 |
| IPI:IPI00289819.5 | 2491 | 274.2 | 5.94 | Cation-independent mannose-6-<br>phosphate receptor                                 | 389.58 | 4 | 92.02  | 2 |
| IPI:IPI01009317.1 | 799  | 92.7  | 5.73 | cDNA FLJ50426, highly similar<br>to Ubiquitin carboxyl-terminal<br>hydrolase 7      | 39.14  | 4 |        |   |
| IPI:IPI00645500.5 | 723  | 80.1  | 7.46 | cDNA FLJ55526, highly similar<br>to Complement C2                                   | 37.55  | 4 | 42.54  | 4 |
| IPI:IPI01015128.1 | 1728 | 194.8 | 6.89 | cDNA FLJ56559, highly similar<br>to FKBP12-rapamycin complex-<br>associated protein | 54.76  | 4 |        |   |
| IPI:IPI00922262.1 | 245  | 27.3  | 6.52 | cDNA FLJ56822, highly similar<br>to Alpha-2-HS-glycoprotein                         | 93.48  | 4 | 132.21 | 3 |
| IPI:IPI01013149.1 | 933  | 104.1 | 7.23 | cDNA FLJ60085, highly similar<br>to Nucleolar protein 8<br>(Fragment)               | 38.64  | 4 |        |   |
| IPI:IPI00967421.1 | 1159 | 131.3 | 7.58 | cDNA FLJ61614, highly similar<br>to TBC1 domain family member<br>1                  | 30.40  | 4 |        |   |
| IPI:IPI00844508.1 | 1203 | 137.0 | 5.52 | cingulin                                                                            | 61.47  | 4 | 44.01  | 2 |

|                   |      |       |      |                                                                           |        |   |        |   |
|-------------------|------|-------|------|---------------------------------------------------------------------------|--------|---|--------|---|
| IPI:IPI00295851.4 | 953  | 107.1 | 6.05 | Coatomer subunit beta                                                     | 35.75  | 4 | 33.48  | 3 |
| IPI:IPI00984519.1 | 356  | 40.8  | 5.78 | complement C4-B-like isoform 2                                            | 68.26  | 4 |        |   |
| IPI:IPI00296608.6 | 843  | 93.5  | 6.48 | Complement component C7                                                   | 50.37  | 4 | 66.11  | 2 |
| IPI:IPI00647073.1 | 688  | 80.3  | 7.39 | Cullin 2                                                                  | 88.43  | 4 | 93.84  | 4 |
| IPI:IPI00015286.2 | 1865 | 215.2 | 7.56 | Dedicator of cytokinesis protein 1                                        | 57.33  | 4 |        |   |
| IPI:IPI00916860.3 | 2180 | 249.3 | 7.17 | DOCK10.2                                                                  | 50.05  | 4 |        |   |
| IPI:IPI00221325.3 | 3224 | 358.0 | 6.20 | E3 SUMO-protein ligase RanBP2                                             | 182.92 | 4 | 72.78  | 3 |
| IPI:IPI00853191.2 | 1100 | 127.8 | 8.78 | HCG1775942, isoform CRA_a                                                 | 382.54 | 4 | 114.38 | 3 |
| IPI:IPI00879573.1 | 499  | 57.0  | 6.90 | Heparin cofactor 2                                                        | 45.02  | 4 | 43.46  | 4 |
| IPI:IPI00983158.1 | 460  | 50.8  | 8.12 | hypothetical protein LOC100131673                                         | 41.14  | 4 |        |   |
| IPI:IPI00642632.2 | 106  | 11.3  | 8.28 | Ig lambda-7 chain C region                                                | 259.69 | 4 | 170.67 | 2 |
| IPI:IPI00829806.1 | 126  | 14.1  | 7.94 | Immunglobulin heavy chain variable region (Fragment)                      | 108.50 | 4 | 51.52  | 3 |
| IPI:IPI00020996.5 | 605  | 66.0  | 6.79 | Insulin-like growth factor-binding protein                                | 27.63  | 4 | 19.93  | 4 |
| IPI:IPI00103356.2 | 712  | 78.3  | 6.84 | Integrin beta                                                             | 33.41  | 4 |        |   |
| IPI:IPI00760833.1 | 1709 | 196.2 | 5.72 | Isoform 1 of Ankyrin repeat domain-containing protein 26                  | 159.77 | 4 | 122.52 | 4 |
| IPI:IPI00328762.6 | 5058 | 575.8 | 6.46 | Isoform 1 of ATP-binding cassette sub-family A member 13                  | 87.61  | 4 | 72.71  | 3 |
| IPI:IPI00013743.4 | 619  | 70.5  | 9.86 | Isoform 1 of BUD13 homolog                                                | 70.54  | 4 | 81.76  | 4 |
| IPI:IPI00479279.3 | 1427 | 165.0 | 5.36 | Isoform 1 of Coiled-coil domain-containing protein 144A                   | 85.94  | 4 | 96.83  | 2 |
| IPI:IPI00305282.2 | 1312 | 153.8 | 6.89 | Isoform 1 of DNA repair protein RAD50                                     | 73.11  | 4 | 63.77  | 4 |
| IPI:IPI00412106.2 | 3092 | 356.7 | 6.19 | Isoform 1 of Dynein heavy chain 12, axonemal                              | 187.55 | 4 | 122.23 | 5 |
| IPI:IPI00001580.5 | 1478 | 166.9 | 4.92 | Isoform 1 of FYVE and coiled-coil domain-containing protein 1             | 55.68  | 4 |        |   |
| IPI:IPI00418991.6 | 1735 | 189.9 | 7.08 | Isoform 1 of Glutamine and serine-rich protein 1                          | 52.02  | 4 | 44.37  | 2 |
| IPI:IPI00183913.4 | 2623 | 290.7 | 9.13 | Isoform 1 of Immunoglobulin superfamily member 10                         | 62.88  | 4 |        |   |
| IPI:IPI00304064.8 | 1801 | 196.2 | 4.94 | Isoform 1 of InaD-like protein                                            | 56.36  | 4 | 35.16  | 2 |
| IPI:IPI00019502.3 | 1960 | 226.4 | 5.60 | Isoform 1 of Myosin-9                                                     | 112.90 | 4 | 96.70  | 8 |
| IPI:IPI00382432.1 | 1256 | 143.5 | 7.17 | Isoform 1 of N-acetylglucosamine-1-phosphotransferase subunits alpha/beta | 27.01  | 4 |        |   |
| IPI:IPI00163207.1 | 576  | 62.2  | 7.55 | Isoform 1 of N-acetylmuramoyl-L-alanine amidase                           | 48.59  | 4 | 28.57  | 3 |
| IPI:IPI00070943.4 | 2044 | 231.2 | 6.87 | Isoform 1 of Phosphatidylinositol 4-kinase alpha                          | 121.52 | 4 | 56.90  | 3 |
| IPI:IPI00014898.3 | 4684 | 531.5 | 5.96 | Isoform 1 of Plectin                                                      | 201.61 | 4 | 115.71 | 2 |
| IPI:IPI00411656.5 | 5065 | 552.9 | 6.51 | Isoform 1 of Protein piccolo                                              | 97.22  | 4 | 134.38 | 4 |
| IPI:IPI00103853.7 | 343  | 38.3  | 7.85 | Isoform 1 of Putative ribosome-binding factor A, mitochondrial            | 35.75  | 4 |        |   |
| IPI:IPI00397474.2 | 2120 | 233.0 | 7.55 | Isoform 1 of Separin                                                      | 55.72  | 4 |        |   |
| IPI:IPI00412650.2 | 2214 | 247.6 | 6.98 | Isoform 1 of Supervillin                                                  | 67.03  | 4 |        |   |
| IPI:IPI00007253.4 | 1435 | 160.9 | 6.87 | Isoform 1 of Trafficking protein particle complex subunit 8               | 41.76  | 4 |        |   |

|                   |      |       |      |                                                                       |        |   |        |   |
|-------------------|------|-------|------|-----------------------------------------------------------------------|--------|---|--------|---|
| IPI:IPI00829865.1 | 915  | 103.9 | 8.87 | Isoform 1 of Transmembrane and TPR repeat-containing protein 3        | 79.46  | 4 | 139.28 | 3 |
| IPI:IPI00106567.2 | 1336 | 145.8 | 9.17 | Isoform 1 of WD repeat-containing protein 33                          | 156.29 | 4 |        |   |
| IPI:IPI00023757.2 | 1020 | 113.3 | 4.86 | Isoform 1 of X-linked retinitis pigmentosa GTPase regulator           | 74.17  | 4 | 33.12  | 2 |
| IPI:IPI00413365.3 | 2279 | 251.0 | 7.20 | Isoform 1 of Zinc finger protein 318                                  | 43.09  | 4 | 51.38  | 3 |
| IPI:IPI00218500.6 | 3931 | 427.5 | 9.14 | Isoform 14P-18B of Histone-lysine N-methyltransferase MLL             | 84.45  | 4 | 69.60  | 2 |
| IPI:IPI00383565.5 | 1524 | 175.3 | 6.81 | Isoform 2 of Bromodomain adjacent to zinc finger domain protein 1A    | 65.13  | 4 | 21.08  | 3 |
| IPI:IPI00856077.1 | 1146 | 129.7 | 6.87 | Isoform 2 of DENN domain-containing protein 3                         | 42.36  | 4 | 67.09  | 2 |
| IPI:IPI00795394.3 | 4410 | 503.0 | 5.91 | Isoform 2 of Dynein heavy chain 9, axonemal                           | 122.98 | 4 | 63.93  | 2 |
| IPI:IPI00376283.1 | 1758 | 197.2 | 9.63 | Isoform 2 of E3 ubiquitin-protein ligase RBBP6                        | 74.16  | 4 |        |   |
| IPI:IPI00807491.2 | 2084 | 236.1 | 7.52 | Isoform 2 of General transcription factor 3C polypeptide 1            | 111.40 | 4 | 67.04  | 5 |
| IPI:IPI00941398.2 | 1670 | 190.4 | 8.24 | Isoform 2 of Intersectin-2                                            | 56.47  | 4 | 57.49  | 4 |
| IPI:IPI00043638.1 | 605  | 67.2  | 8.03 | Isoform 2 of La-related protein 4                                     | 46.15  | 4 | 80.32  | 2 |
| IPI:IPI00477428.1 | 755  | 85.7  | 6.39 | Isoform 2 of Lethal(3)malignant brain tumor-like protein 3            | 44.55  | 4 | 39.52  | 2 |
| IPI:IPI00788168.4 | 2429 | 264.6 | 8.69 | Isoform 2 of Microtubule-associated serine/threonine-protein kinase 4 | 77.73  | 4 | 49.32  | 2 |
| IPI:IPI00396528.2 | 1464 | 158.7 | 7.25 | Isoform 2 of Multidrug resistance-associated protein 7                | 212.37 | 4 | 120.71 | 2 |
| IPI:IPI00514075.5 | 1096 | 124.7 | 6.43 | Isoform 2 of Protein diaphanous homolog 2                             | 101.16 | 4 | 42.41  | 3 |
| IPI:IPI00399170.1 | 1118 | 123.0 | 6.68 | Isoform 2 of Regulator of nonsense transcripts 1                      | 72.65  | 4 | 48.71  | 2 |
| IPI:IPI00784002.3 | 3829 | 436.7 | 7.18 | Isoform 2 of Sacsin                                                   | 86.95  | 4 | 80.57  | 6 |
| IPI:IPI00747180.4 | 1854 | 213.7 | 5.39 | Isoform 2 of WD repeat-containing protein 52                          | 270.64 | 4 | 319.61 | 3 |
| IPI:IPI00885004.1 | 3327 | 377.1 | 6.42 | Isoform 2 of Xin actin-binding repeat-containing protein 2            | 130.03 | 4 | 143.30 | 5 |
| IPI:IPI00470896.4 | 2518 | 282.3 | 6.40 | Isoform 2 of Zinc finger FYVE domain-containing protein 26            | 58.66  | 4 | 76.13  | 4 |
| IPI:IPI00217113.1 | 1392 | 156.7 | 5.36 | Isoform 3 of CAP-Gly domain-containing linker protein 1               | 80.29  | 4 | 193.91 | 5 |
| IPI:IPI00872707.1 | 1654 | 189.0 | 5.44 | Isoform 3 of Centrosomal protein of 152 kDa                           | 88.84  | 4 |        |   |
| IPI:IPI00607850.1 | 1544 | 176.9 | 6.58 | Isoform 3 of Citron Rho-interacting kinase                            | 114.91 | 4 | 58.29  | 2 |
| IPI:IPI00334492.5 | 1154 | 133.8 | 5.57 | Isoform 3 of Coiled-coil domain-containing protein 144A               | 70.21  | 4 | 61.87  | 2 |
| IPI:IPI00885046.1 | 1205 | 138.3 | 6.32 | Isoform 3 of Dynein heavy chain 1, axonemal                           | 206.30 | 4 |        |   |
| IPI:IPI00927899.1 | 1093 | 125.1 | 6.28 | Isoform 3 of Dynein heavy chain 12, axonemal                          | 119.51 | 4 | 30.55  | 2 |



|                   |       |        |      |                                                                                         |        |   |        |   |
|-------------------|-------|--------|------|-----------------------------------------------------------------------------------------|--------|---|--------|---|
| IPI:IPI00217992.1 | 2649  | 306.6  | 6.32 | Isoform 3 of Dystonin                                                                   | 196.88 | 4 | 131.97 | 3 |
| IPI:IPI00642180.1 | 1114  | 127.1  | 8.13 | Isoform 3 of Filamin-A-interacting protein 1                                            | 70.34  | 4 | 49.36  | 5 |
| IPI:IPI00333276.5 | 2186  | 235.1  | 8.56 | Isoform 3 of Neuron navigator 3                                                         | 42.79  | 4 |        |   |
| IPI:IPI00552692.3 | 1561  | 175.7  | 6.84 | Isoform 3 of Phosphatidylinositol 3,4,5-trisphosphate-dependent Rac exchanger 1 protein | 84.64  | 4 | 32.04  | 2 |
| IPI:IPI00879441.1 | 1391  | 154.0  | 7.77 | Isoform 3 of Protein strawberry notch homolog 1                                         | 55.63  | 4 | 38.39  | 3 |
| IPI:IPI00619921.3 | 2240  | 243.7  | 7.88 | Isoform 4 of Death-inducer obliterator 1                                                | 73.64  | 4 |        |   |
| IPI:IPI00794752.1 | 1182  | 135.5  | 7.11 | Isoform 4 of Protein diaphanous homolog 3                                               | 45.14  | 4 | 33.86  | 2 |
| IPI:IPI00885111.2 | 5004  | 555.0  | 6.58 | Isoform 4 of Uncharacterized protein KIAA1109                                           | 142.44 | 4 |        |   |
| IPI:IPI00604778.1 | 3585  | 402.8  | 6.38 | Isoform 4 of Vacuolar protein sorting-associated protein 13C                            | 126.53 | 4 | 85.32  | 3 |
| IPI:IPI00791794.1 | 1123  | 128.9  | 7.20 | Isoform 6 of Protein diaphanous homolog 3                                               | 47.22  | 4 | 35.78  | 3 |
| IPI:IPI00013933.2 | 2871  | 331.6  | 6.81 | Isoform DPI of Desmoplakin                                                              | 72.05  | 4 |        |   |
| IPI:IPI00479402.4 | 1947  | 223.5  | 7.93 | Isoform TRPM6t of Transient receptor potential cation channel subfamily M member 6      | 45.90  | 4 |        |   |
| IPI:IPI00470917.2 | 1840  | 213.1  | 6.28 | KIAA1529 protein                                                                        | 54.85  | 4 | 50.52  | 2 |
| IPI:IPI00022417.4 | 347   | 38.2   | 6.95 | Leucine-rich alpha-2-glycoprotein                                                       | 52.55  | 4 | 26.84  | 4 |
| IPI:IPI00175649.4 | 2527  | 285.9  | 6.80 | Leucine-rich repeat serine/threonine-protein kinase 2                                   | 81.57  | 4 | 41.21  | 2 |
| IPI:IPI00917696.2 | 4537  | 508.5  | 5.36 | Low density lipoprotein-related protein 1B variant                                      | 43.32  | 4 | 40.12  | 5 |
| IPI:IPI01015973.1 | 14507 | 1518.2 | 5.26 | mucin-16                                                                                | 120.11 | 4 | 63.30  | 4 |
| IPI:IPI00103552.4 | 22152 | 2351.2 | 6.00 | Mucin-16                                                                                | 106.10 | 4 | 66.32  | 4 |
| IPI:IPI00001753.2 | 1939  | 222.9  | 5.85 | Myosin-4                                                                                | 77.95  | 4 |        |   |
| IPI:IPI00016007.2 | 1742  | 202.7  | 7.71 | Myosin-Vc                                                                               | 66.45  | 4 | 51.80  | 2 |
| IPI:IPI00152380.4 | 3530  | 395.0  | 9.17 | Myosin-XV                                                                               | 62.03  | 4 | 69.07  | 4 |
| IPI:IPI00239415.4 | 6825  | 788.0  | 5.47 | Polytrophin                                                                             | 304.79 | 4 | 217.82 | 3 |
| IPI:IPI00955854.1 | 771   | 84.1   | 9.83 | POU domain, class 4, transcription factor 3, isoform CRA a                              | 119.03 | 4 | 52.31  | 3 |
| IPI:IPI00010200.3 | 1430  | 160.1  | 8.40 | Probable ATP-dependent RNA helicase YTHDC2                                              | 39.08  | 4 |        |   |
| IPI:IPI00020557.2 | 4544  | 504.3  | 5.39 | Pro-low-density lipoprotein receptor-related protein 1                                  | 131.48 | 4 | 84.76  | 3 |
| IPI:IPI00399119.1 | 1576  | 175.5  | 8.85 | Protein FAM75D1                                                                         | 38.68  | 4 | 21.35  | 2 |
| IPI:IPI00871753.3 | 459   | 49.6   | 9.95 | Putative protein FAM90A-like                                                            | 19.82  | 4 |        |   |
| IPI:IPI00556287.1 | 189   | 20.7   | 5.27 | Putative uncharacterized protein                                                        | 685.77 | 4 | 280.93 | 4 |
| IPI:IPI01013894.1 | 1007  | 108.6  | 5.85 | Putative uncharacterized protein                                                        | 115.71 | 4 | 77.04  | 2 |
| IPI:IPI00981019.2 | 3739  | 407.4  | 5.25 | Putative uncharacterized protein DKFZp666E245                                           | 72.97  | 4 |        |   |
| IPI:IPI01013681.1 | 995   | 116.7  | 8.34 | Putative uncharacterized protein SMARCA5                                                | 36.74  | 4 | 20.48  | 2 |
| IPI:IPI00414179.1 | 326   | 37.8   | 8.84 | Ras association domain-containing protein 2                                             | 28.80  | 4 |        |   |

|                   |      |       |      |                                                               |        |   |        |   |
|-------------------|------|-------|------|---------------------------------------------------------------|--------|---|--------|---|
| IPI:IPI00981659.1 | 141  | 14.9  | 9.57 | Similar to Cold agglutinin FS-1 H-chain                       | 150.53 | 4 | 149.97 | 3 |
| IPI:IPI00976617.1 | 188  | 20.0  | 7.72 | Similar to Immunglobulin heavy chain variable region          | 52.58  | 4 | 20.15  | 3 |
| IPI:IPI00977733.1 | 123  | 13.5  | 9.07 | Similar to VH-7 family (N54P3)D/J protein                     | 84.52  | 4 | 40.09  | 2 |
| IPI:IPI00748998.1 | 240  | 25.6  | 9.11 | Single-chain Fv (Fragment)                                    | 417.20 | 4 | 194.22 | 3 |
| IPI:IPI00219420.3 | 1217 | 141.5 | 7.18 | Structural maintenance of chromosomes protein 3               | 124.01 | 4 |        |   |
| IPI:IPI00015869.2 | 1943 | 253.8 | 5.78 | Trichohyalin                                                  | 61.29  | 4 | 42.60  | 2 |
| IPI:IPI00024467.3 | 1516 | 174.6 | 6.89 | UDP-glucose:glycoprotein glucosyltransferase 2                | 55.59  | 4 | 29.45  | 2 |
| IPI:IPI00981831.1 | 1588 | 179.4 | 7.66 | Uncharacterized protein                                       | 171.02 | 4 | 24.58  | 2 |
| IPI:IPI00448322.3 | 475  | 54.3  | 8.82 | Uncharacterized protein                                       | 131.89 | 4 | 69.29  | 4 |
| IPI:IPI00873495.1 | 2727 | 305.2 | 7.77 | Uncharacterized protein                                       | 103.38 | 4 |        |   |
| IPI:IPI00917610.1 | 628  | 71.9  | 5.45 | Uncharacterized protein                                       | 37.39  | 4 |        |   |
| IPI:IPI00445741.2 | 939  | 104.9 | 6.05 | Uncharacterized protein                                       | 39.15  | 4 | 17.87  | 2 |
| IPI:IPI00022479.6 | 4862 | 532.0 | 6.04 | Uncharacterized protein                                       | 100.19 | 4 | 98.59  | 4 |
| IPI:IPI00980475.1 | 551  | 59.9  | 8.76 | Uncharacterized protein                                       | 23.48  | 4 |        |   |
| IPI:IPI00964840.2 | 175  | 19.6  | 5.43 | Uncharacterized protein                                       | 22.63  | 4 | 28.81  | 3 |
| IPI:IPI00982650.1 | 1031 | 119.1 | 7.18 | Uncharacterized protein                                       | 31.14  | 4 | 27.93  | 2 |
| IPI:IPI01008814.1 | 2730 | 299.6 | 4.42 | Uncharacterized protein                                       | 50.12  | 4 |        |   |
| IPI:IPI00018808.5 | 1747 | 194.7 | 8.78 | Uncharacterized protein C12orf35                              | 117.40 | 4 | 106.95 | 3 |
| IPI:IPI00942305.2 | 826  | 94.4  | 7.18 | Zinc finger DAZ interacting protein 3, isoform CRA_a          | 50.33  | 4 | 38.45  | 2 |
| IPI:IPI00937669.2 | 97   | 10.4  | 8.91 | 10 kDa protein                                                | 363.69 | 3 | 159.42 | 3 |
| IPI:IPI01013665.1 | 983  | 113.7 | 7.58 | 114 kDa protein                                               | 45.32  | 3 | 23.96  | 2 |
| IPI:IPI01012103.1 | 1048 | 115.9 | 5.68 | 116 kDa protein                                               | 104.52 | 3 | 27.68  | 2 |
| IPI:IPI00921217.2 | 1129 | 131.7 | 9.29 | 132 kDa protein                                               | 25.16  | 3 |        |   |
| IPI:IPI01012026.1 | 1886 | 215.2 | 5.90 | 215 kDa protein                                               | 36.91  | 3 |        |   |
| IPI:IPI00939742.1 | 2301 | 262.1 | 6.68 | 262 kDa protein                                               | 73.09  | 3 | 38.63  | 2 |
| IPI:IPI01014201.1 | 277  | 30.8  | 7.65 | 31 kDa protein                                                | 36.53  | 3 | 12.33  | 2 |
| IPI:IPI01009469.1 | 447  | 50.9  | 6.34 | 51 kDa protein                                                | 27.79  | 3 |        |   |
| IPI:IPI00946206.1 | 562  | 63.4  | 7.84 | 63 kDa protein                                                | 84.54  | 3 |        |   |
| IPI:IPI00981883.1 | 702  | 79.2  | 4.88 | 79 kDa protein                                                | 55.69  | 3 |        |   |
| IPI:IPI00879608.2 | 427  | 47.9  | 6.10 | alpha-2-antiplasmin isoform b precursor                       | 44.01  | 3 | 58.08  | 5 |
| IPI:IPI00168819.1 | 765  | 84.6  | 7.08 | Ankyrin repeat and protein kinase domain-containing protein 1 | 38.77  | 3 |        |   |
| IPI:IPI00217005.7 | 992  | 115.5 | 7.83 | Ankyrin repeat domain-containing protein 18A                  | 37.42  | 3 | 38.90  | 3 |
| IPI:IPI00921566.2 | 4377 | 480.1 | 6.49 | Ankyrin-3                                                     | 110.58 | 3 | 155.54 | 2 |
| IPI:IPI00967510.1 | 1868 | 204.0 | 6.93 | ankyrin-3 isoform 4                                           | 70.91  | 3 | 73.41  | 2 |
| IPI:IPI00915820.1 | 120  | 13.3  | 8.44 | Anti-folate binding protein (Fragment)                        | 131.36 | 3 | 55.72  | 3 |
| IPI:IPI00828061.1 | 124  | 13.9  | 5.41 | Anti-mucin1 heavy chain variable region (Fragment)            | 90.21  | 3 | 42.76  | 2 |
| IPI:IPI00029168.1 | 4548 | 501.0 | 5.88 | Apolipoprotein(a)                                             | 11.80  | 3 | 6.98   | 2 |
| IPI:IPI00301323.1 | 670  | 75.4  | 9.50 | ATP-dependent RNA helicase DDX18                              | 56.07  | 3 | 48.71  | 4 |
| IPI:IPI00412408.1 | 3418 | 384.0 | 6.73 | Breast cancer type 2 susceptibility protein                   | 118.61 | 3 | 94.48  | 6 |
| IPI:IPI00479116.2 | 545  | 60.5  | 5.99 | Carboxypeptidase N subunit 2                                  | 24.18  | 3 |        |   |
| IPI:IPI01011923.1 | 913  | 107.6 | 6.34 | CCDC46 protein                                                | 62.30  | 3 | 37.54  | 2 |

|                   |      |       |      |                                                                                                                       |        |   |       |   |
|-------------------|------|-------|------|-----------------------------------------------------------------------------------------------------------------------|--------|---|-------|---|
| IPI:IPI00072257.1 | 441  | 48.7  | 7.53 | cDNA FLJ10915 fis, clone OVARC1000288, weakly similar to VACUOLAR AMINOPEPTIDASE I                                    | 10.13  | 3 |       |   |
| IPI:IPI00871188.2 | 411  | 46.7  | 9.17 | cDNA FLJ35693 fis, clone SPLEN2019571, weakly similar to KINESIN LIGHT CHAIN                                          | 285.79 | 3 |       |   |
| IPI:IPI00935400.4 | 485  | 56.3  | 4.98 | cDNA FLJ35783 fis, clone TESTI2005568, highly similar to Homo sapiens cancer susceptibility candidate 1 (CASC1), mRNA | 41.91  | 3 | 26.95 | 2 |
| IPI:IPI01014319.1 | 249  | 28.6  | 5.69 | cDNA FLJ40708 fis, clone THYMU2026904, highly similar to Proto-oncogene tyrosine-protein kinase LCK                   | 7.37   | 3 | 21.88 | 2 |
| IPI:IPI00445971.1 | 569  | 61.2  | 8.21 | cDNA FLJ43251 fis, clone HEART2006131, weakly similar to Mus musculus 2-hydroxyphytanoyl-CoA lyase                    | 17.36  | 3 |       |   |
| IPI:IPI01011882.1 | 410  | 43.6  | 7.03 | cDNA FLJ50515, highly similar to Dihydrolipoyl dehydrogenase, mitochondrial                                           | 13.27  | 3 |       |   |
| IPI:IPI00556429.3 | 506  | 58.1  | 8.29 | cDNA FLJ51423, highly similar to Serine/threonine-protein kinase PLK1                                                 | 52.74  | 3 |       |   |
| IPI:IPI00922298.1 | 270  | 29.8  | 6.43 | cDNA FLJ51445, highly similar to AMBP protein                                                                         | 14.69  | 3 |       |   |
| IPI:IPI01014559.1 | 1059 | 116.5 | 5.73 | cDNA FLJ51576, highly similar to Jagged-1                                                                             | 27.98  | 3 | 48.38 | 2 |
| IPI:IPI00966376.1 | 880  | 101.5 | 7.80 | cDNA FLJ53191, highly similar to Ras GTPase-activating protein 1                                                      | 29.45  | 3 |       |   |
| IPI:IPI00873551.3 | 686  | 80.0  | 5.19 | cDNA FLJ53232, highly similar to Hook homolog 1                                                                       | 41.97  | 3 |       |   |
| IPI:IPI00908592.1 | 697  | 80.5  | 5.40 | cDNA FLJ54388, highly similar to Tax1-binding protein 1                                                               | 26.63  | 3 | 30.05 | 2 |
| IPI:IPI01014903.1 | 1085 | 124.5 | 8.47 | cDNA FLJ55443, highly similar to Ras GTPase-activating-like protein IQGAP1                                            | 37.34  | 3 | 41.93 | 2 |
| IPI:IPI00909023.1 | 1118 | 124.0 | 5.57 | cDNA FLJ56487, highly similar to Methionine synthase                                                                  | 112.16 | 3 | 40.82 | 2 |
| IPI:IPI00909594.1 | 486  | 53.7  | 5.40 | cDNA FLJ58413, highly similar to Complement component C7                                                              | 24.97  | 3 | 31.05 | 2 |
| IPI:IPI00795341.2 | 1152 | 131.4 | 6.70 | cDNA FLJ59502, highly similar to Liprin-alpha-2                                                                       | 34.99  | 3 |       |   |
| IPI:IPI00888252.2 | 964  | 105.1 | 9.16 | cDNA FLJ60294                                                                                                         | 25.92  | 3 |       |   |
| IPI:IPI01015872.1 | 1068 | 121.6 | 5.33 | cDNA FLJ61720, highly similar to Homo sapiens ring finger protein 17 (RNF17), mRNA                                    | 24.45  | 3 |       |   |
| IPI:IPI00647752.2 | 814  | 88.9  | 6.68 | cDNA FLJ61735, highly similar to Zinc finger A20 domain-containing protein 1                                          | 120.93 | 3 |       |   |
| IPI:IPI00103595.2 | 3117 | 350.7 | 6.33 | Centrosome-associated protein 350                                                                                     | 65.90  | 3 |       |   |
| IPI:IPI00329141.4 | 802  | 91.7  | 9.23 | Chondroitin sulfate synthase 1                                                                                        | 43.34  | 3 | 61.31 | 2 |
| IPI:IPI01010861.1 | 466  | 54.2  | 5.19 | Clusterin-like protein 1                                                                                              | 13.48  | 3 |       |   |

|                   |      |       |      |                                                                                                |        |   |        |   |
|-------------------|------|-------|------|------------------------------------------------------------------------------------------------|--------|---|--------|---|
| IPI:IPI00877084.1 | 1237 | 143.0 | 5.69 | Coiled-coil domain-containing protein 144C                                                     | 75.10  | 3 | 91.02  | 2 |
| IPI:IPI00411743.6 | 951  | 110.4 | 6.47 | Coiled-coil domain-containing protein 15                                                       | 150.43 | 3 |        |   |
| IPI:IPI00065310.2 | 656  | 75.3  | 5.68 | Coiled-coil domain-containing protein 27                                                       | 89.66  | 3 |        |   |
| IPI:IPI00827773.1 | 113  | 12.4  | 8.48 | Cold agglutinin FS-1 L-chain (Fragment)                                                        | 40.43  | 3 | 34.40  | 4 |
| IPI:IPI00011252.1 | 584  | 65.1  | 6.47 | Complement component C8 alpha chain                                                            | 55.54  | 3 | 22.41  | 3 |
| IPI:IPI00011261.2 | 202  | 22.3  | 8.31 | Complement component C8 gamma chain                                                            | 29.95  | 3 |        |   |
| IPI:IPI00106495.1 | 1015 | 114.3 | 5.59 | Condensin complex subunit 3                                                                    | 38.91  | 3 |        |   |
| IPI:IPI00916096.1 | 224  | 25.4  | 8.76 | Conserved hypothetical protein                                                                 | 61.93  | 3 | 38.42  | 2 |
| IPI:IPI00027482.1 | 405  | 45.1  | 6.04 | Corticosteroid-binding globulin                                                                | 29.18  | 3 | 17.52  | 2 |
| IPI:IPI00890754.1 | 120  | 13.2  | 8.48 | Cryocryoglobulin CC1 heavy chain variable region (Fragment)                                    | 54.00  | 3 | 23.29  | 3 |
| IPI:IPI00014310.3 | 776  | 89.6  | 8.00 | Cullin-1                                                                                       | 109.79 | 3 | 86.28  | 3 |
| IPI:IPI00302383.4 | 1480 | 167.6 | 8.40 | Cystic fibrosis transmembrane conductance regulator ATP-binding cassette sub-family C member 7 | 41.13  | 3 | 38.92  | 2 |
| IPI:IPI00552572.3 | 484  | 55.1  | 8.47 | Cytochrome P450 1A1 variant                                                                    | 16.20  | 3 |        |   |
| IPI:IPI00413611.1 | 765  | 90.7  | 9.31 | DNA topoisomerase 1                                                                            | 50.61  | 3 |        |   |
| IPI:IPI00854834.2 | 923  | 102.4 | 6.15 | echinoderm microtubule-associated protein-like 4 isoform b                                     | 31.70  | 3 |        |   |
| IPI:IPI00472614.3 | 957  | 110.5 | 6.99 | ERC protein 2                                                                                  | 48.50  | 3 |        |   |
| IPI:IPI00936831.1 | 1722 | 180.0 | 5.47 | Formin-2                                                                                       | 24.93  | 3 |        |   |
| IPI:IPI00975526.1 | 527  | 59.6  | 9.23 | glycine N-acyltransferase-like protein 1-like                                                  | 31.00  | 3 |        |   |
| IPI:IPI00827876.1 | 128  | 14.3  | 6.54 | Heavy chain Fab (Fragment)                                                                     | 22.73  | 3 |        |   |
| IPI:IPI00002335.1 | 3144 | 347.6 | 6.20 | huntingtin                                                                                     | 59.62  | 3 | 41.23  | 2 |
| IPI:IPI00418963.4 | 2017 | 221.3 | 8.41 | hypothetical protein LOC400499                                                                 | 44.18  | 3 |        |   |
| IPI:IPI01012875.1 | 793  | 93.6  | 6.71 | hypothetical protein LOC729665                                                                 | 45.61  | 3 | 43.05  | 3 |
| IPI:IPI00746850.2 | 971  | 113.5 | 5.71 | hypothetical protein LOC79632 isoform 2                                                        | 61.13  | 3 |        |   |
| IPI:IPI00827482.4 | 120  | 13.2  | 6.57 | Ig heavy chain V-III region BRO                                                                | 341.97 | 3 | 157.28 | 3 |
| IPI:IPI00382481.1 | 115  | 12.4  | 9.25 | Ig heavy chain V-III region BUT                                                                | 77.85  | 3 | 35.57  | 3 |
| IPI:IPI00382482.1 | 122  | 13.7  | 9.63 | Ig heavy chain V-III region CAM                                                                | 76.95  | 3 | 33.53  | 2 |
| IPI:IPI00382483.1 | 122  | 13.2  | 9.77 | Ig heavy chain V-III region GA                                                                 | 90.55  | 3 | 39.90  | 3 |
| IPI:IPI00387024.1 | 107  | 11.7  | 9.41 | Ig kappa chain V-I region CAR                                                                  | 46.59  | 3 |        |   |
| IPI:IPI00003469.1 | 108  | 11.8  | 8.91 | Ig kappa chain V-I region WEA                                                                  | 123.73 | 3 | 56.92  | 2 |
| IPI:IPI00387107.3 | 115  | 12.7  | 5.40 | Ig kappa chain V-II region Cum                                                                 | 19.87  | 3 | 21.06  | 2 |
| IPI:IPI00387115.1 | 109  | 11.8  | 8.48 | Ig kappa chain V-III region SIE                                                                | 151.11 | 3 | 88.76  | 3 |
| IPI:IPI00386132.1 | 133  | 14.6  | 6.58 | Ig kappa chain V-IV region JI                                                                  | 25.27  | 3 | 38.01  | 2 |
| IPI:IPI00387120.1 | 114  | 12.6  | 7.93 | Ig kappa chain V-IV region Len                                                                 | 59.71  | 3 | 64.34  | 3 |
| IPI:IPI00783287.1 | 121  | 13.4  | 8.46 | Immunglobulin heavy chain variable region (Fragment)                                           | 360.96 | 3 | 170.22 | 4 |
| IPI:IPI00783094.1 | 122  | 13.4  | 5.41 | Immunglobulin heavy chain variable region (Fragment)                                           | 59.97  | 3 | 36.94  | 2 |

|                   |      |       |       |                                                                          |        |   |        |   |
|-------------------|------|-------|-------|--------------------------------------------------------------------------|--------|---|--------|---|
| IPI:IPI00783023.1 | 122  | 13.6  | 8.43  | Immunoglobulin heavy chain variable region (Fragment)                    | 78.16  | 3 |        |   |
| IPI:IPI00783909.1 | 119  | 13.0  | 8.81  | Immunoglobulin heavy chain variable region (Fragment)                    | 31.26  | 3 |        |   |
| IPI:IPI00783161.1 | 122  | 13.4  | 7.99  | Immunoglobulin heavy chain variable region (Fragment)                    | 75.71  | 3 |        |   |
| IPI:IPI00328885.3 | 3708 | 383.6 | 5.99  | immunoglobulin-like and fibronectin type III domain-containing protein 1 | 114.12 | 3 |        |   |
| IPI:IPI00217987.8 | 1152 | 127.1 | 7.23  | Integrin alpha-M                                                         | 87.51  | 3 | 44.66  | 3 |
| IPI:IPI00743813.3 | 3477 | 409.5 | 10.45 | Isoform 1 of Abnormal spindle-like microcephaly-associated protein       | 216.46 | 3 | 190.91 | 5 |
| IPI:IPI00170548.1 | 1390 | 158.5 | 6.32  | Isoform 1 of ATPase family AAA domain-containing protein 2               | 74.61  | 3 |        |   |
| IPI:IPI00102575.5 | 1844 | 207.4 | 9.19  | Isoform 1 of ATPase family AAA domain-containing protein 5               | 37.16  | 3 |        |   |
| IPI:IPI00937612.1 | 2435 | 269.7 | 6.81  | Isoform 1 of ATP-binding cassette sub-family A member 2                  | 48.33  | 3 | 45.48  | 2 |
| IPI:IPI00179337.6 | 785  | 89.2  | 5.40  | Isoform 1 of B-cell scaffold protein with ankyrin repeats                | 12.62  | 3 |        |   |
| IPI:IPI00651642.1 | 532  | 56.0  | 10.01 | Isoform 1 of Chromobox protein homolog 2                                 | 33.63  | 3 | 122.82 | 3 |
| IPI:IPI00307829.8 | 1302 | 149.0 | 5.67  | Isoform 1 of Cingulin-like protein 1                                     | 49.16  | 3 |        |   |
| IPI:IPI00642206.2 | 1454 | 168.9 | 5.66  | Isoform 1 of Coiled-coil domain-containing protein 18                    | 51.02  | 3 | 48.16  | 4 |
| IPI:IPI00394751.2 | 1096 | 120.5 | 9.03  | Isoform 1 of Constitutive coactivator of PPAR-gamma-like protein 2       | 89.72  | 3 | 42.81  | 2 |
| IPI:IPI00163266.6 | 511  | 58.3  | 7.77  | Isoform 1 of DEP domain-containing protein 7                             | 16.91  | 3 |        |   |
| IPI:IPI00936051.2 | 4753 | 533.3 | 6.71  | Isoform 1 of Dynein heavy chain domain-containing protein 1              | 74.12  | 3 | 38.78  | 3 |
| IPI:IPI00798384.4 | 994  | 108.8 | 7.15  | Isoform 1 of E3 ubiquitin-protein ligase Arkadia                         | 24.59  | 3 |        |   |
| IPI:IPI00171771.3 | 731  | 80.4  | 6.84  | Isoform 1 of E3 ubiquitin-protein ligase RFWD2                           | 11.72  | 3 | 18.47  | 2 |
| IPI:IPI00013735.1 | 710  | 81.4  | 8.05  | Isoform 1 of FAST kinase domain-containing protein 2                     | 107.08 | 3 | 69.50  | 2 |
| IPI:IPI00883989.1 | 2093 | 241.8 | 7.96  | Isoform 1 of Fer-1-like protein 5                                        | 55.60  | 3 |        |   |
| IPI:IPI00305267.2 | 1498 | 167.3 | 5.44  | Isoform 1 of Golgin subfamily A member 3                                 | 64.23  | 3 | 56.33  | 2 |
| IPI:IPI00165934.6 | 6306 | 692.6 | 4.64  | Isoform 1 of G-protein coupled receptor 98                               | 70.79  | 3 |        |   |
| IPI:IPI00005631.3 | 1684 | 195.8 | 5.14  | Isoform 1 of GRIP and coiled-coil domain-containing protein 2            | 134.95 | 3 | 84.84  | 2 |
| IPI:IPI00003865.1 | 646  | 70.9  | 5.52  | Isoform 1 of Heat shock cognate 71 kDa protein                           | 35.73  | 3 |        |   |
| IPI:IPI00297859.2 | 5537 | 593.0 | 5.58  | Isoform 1 of Histone-lysine N-methyltransferase MLL2                     | 65.10  | 3 |        |   |
| IPI:IPI00647188.4 | 5121 | 575.5 | 6.06  | Isoform 1 of Hydrocephalus-inducing protein homolog                      | 83.98  | 3 |        |   |

|                   |      |       |      |                                                                               |        |   |       |   |
|-------------------|------|-------|------|-------------------------------------------------------------------------------|--------|---|-------|---|
| IPI:IPI00815851.1 | 1722 | 199.2 | 6.19 | Isoform 1 of Leucine-rich repeat and IQ domain-containing protein 1           | 126.39 | 3 | 73.89 | 2 |
| IPI:IPI00301676.3 | 1372 | 150.1 | 7.44 | Isoform 1 of Leucine-rich repeat-containing protein 16B                       | 26.98  | 3 |       |   |
| IPI:IPI00175151.7 | 2002 | 223.7 | 7.99 | Isoform 1 of Methylcytosine dioxygenase TET2                                  | 40.11  | 3 |       |   |
| IPI:IPI00607578.1 | 1330 | 150.8 | 6.76 | Isoform 1 of Nephrocystin-3                                                   | 286.49 | 3 |       |   |
| IPI:IPI00022674.2 | 979  | 110.4 | 5.82 | Isoform 1 of Oncostatin-M-specific receptor subunit beta                      | 12.09  | 3 |       |   |
| IPI:IPI00299503.2 | 840  | 92.3  | 6.37 | Isoform 1 of Phosphatidylinositol-glycan-specific phospholipase D             | 39.59  | 3 | 52.45 | 4 |
| IPI:IPI00165931.7 | 1894 | 212.3 | 6.86 | Isoform 1 of Plexin-A4                                                        | 49.79  | 3 |       |   |
| IPI:IPI00942832.3 | 3996 | 439.1 | 6.19 | Isoform 1 of Probable E3 ubiquitin-protein ligase C12orf51                    | 46.78  | 3 | 67.30 | 2 |
| IPI:IPI00740019.3 | 2028 | 228.1 | 6.23 | Isoform 1 of Protein Daple                                                    | 51.40  | 3 |       |   |
| IPI:IPI00014444.6 | 654  | 74.1  | 7.68 | Isoform 1 of Protein SERAC1                                                   | 19.02  | 3 |       |   |
| IPI:IPI00003904.1 | 929  | 100.9 | 5.11 | Isoform 1 of Protocadherin gamma-B7                                           | 37.09  | 3 | 24.07 | 2 |
| IPI:IPI00855921.2 | 870  | 100.5 | 7.49 | Isoform 1 of Radial spoke head 10 homolog B2                                  | 19.39  | 3 | 22.10 | 3 |
| IPI:IPI01014963.1 | 1748 | 196.5 | 6.10 | Isoform 1 of RANBP2-like and GRIP domain-containing protein 1/2               | 83.45  | 3 | 51.83 | 2 |
| IPI:IPI00293568.2 | 1765 | 198.8 | 6.42 | Isoform 1 of RANBP2-like and GRIP domain-containing protein 5/6               | 46.57  | 3 | 32.28 | 4 |
| IPI:IPI00023019.1 | 402  | 43.8  | 6.71 | Isoform 1 of Sex hormone-binding globulin                                     | 25.21  | 3 | 9.38  | 2 |
| IPI:IPI00847618.2 | 1742 | 186.3 | 8.87 | Isoform 1 of SH3 and multiple ankyrin repeat domains protein 3                | 30.31  | 3 |       |   |
| IPI:IPI00854642.1 | 1337 | 150.7 | 7.91 | Isoform 1 of Sister chromatid cohesion protein PDS5 homolog A                 | 35.17  | 3 | 23.52 | 2 |
| IPI:IPI00853627.1 | 532  | 59.4  | 9.06 | Isoform 1 of UPF0501 protein KIAA1430                                         | 22.28  | 3 |       |   |
| IPI:IPI00744524.3 | 2873 | 333.0 | 7.28 | Isoform 1 of WD repeat-containing protein 87                                  | 78.52  | 3 | 56.06 | 4 |
| IPI:IPI00827877.3 | 723  | 79.1  | 8.66 | Isoform 1 of Zinc finger MYM-type protein 6                                   | 10.89  | 3 |       |   |
| IPI:IPI00307665.4 | 1483 | 166.7 | 9.28 | Isoform 1 of Zinc finger protein 518A                                         | 53.60  | 3 | 44.63 | 2 |
| IPI:IPI00783616.1 | 1655 | 184.7 | 7.75 | Isoform 2 of 1-phosphatidylinositol-4,5-bisphosphate phosphodiesterase eta-1  | 98.59  | 3 | 68.55 | 3 |
| IPI:IPI00296965.4 | 860  | 97.1  | 7.23 | Isoform 2 of A disintegrin and metalloproteinase with thrombospondin motifs 6 | 28.50  | 3 |       |   |
| IPI:IPI00007193.7 | 1267 | 148.2 | 6.14 | Isoform 2 of Ankyrin repeat domain-containing protein 26                      | 73.29  | 3 | 63.44 | 3 |
| IPI:IPI00939593.1 | 448  | 50.5  | 6.14 | Isoform 2 of ATP-dependent RNA helicase DDX19B                                | 19.42  | 3 |       |   |
| IPI:IPI00455383.4 | 1639 | 187.8 | 5.69 | Isoform 2 of Clathrin heavy chain 1                                           | 34.86  | 3 | 35.63 | 2 |

|                   |      |       |      |                                                                                                |        |   |        |   |
|-------------------|------|-------|------|------------------------------------------------------------------------------------------------|--------|---|--------|---|
| IPI:IPI00410188.4 | 669  | 79.0  | 9.11 | Isoform 2 of Coiled-coil domain-containing protein 146                                         | 36.19  | 3 |        |   |
| IPI:IPI00383440.4 | 1606 | 159.1 | 7.03 | Isoform 2 of Collagen alpha-1(XXII) chain                                                      | 45.68  | 3 |        |   |
| IPI:IPI00402732.4 | 2407 | 268.2 | 5.54 | Isoform 2 of Cullin-9                                                                          | 49.28  | 3 |        |   |
| IPI:IPI00029162.3 | 1452 | 158.3 | 9.70 | Isoform 2 of Cyclin-dependent kinase 13                                                        | 65.58  | 3 |        |   |
| IPI:IPI00760939.1 | 816  | 94.4  | 8.66 | Isoform 2 of DENN domain-containing protein 2C                                                 | 101.01 | 3 |        |   |
| IPI:IPI00893505.1 | 773  | 87.0  | 7.20 | Isoform 2 of Diacylglycerol kinase beta                                                        | 31.51  | 3 |        |   |
| IPI:IPI00943773.2 | 4448 | 507.5 | 5.72 | Isoform 2 of Dynein heavy chain 17, axonemal                                                   | 111.08 | 3 |        |   |
| IPI:IPI00394845.6 | 1349 | 155.7 | 8.07 | Isoform 2 of EF-hand calcium-binding domain-containing protein 6                               | 58.60  | 3 |        |   |
| IPI:IPI00953519.2 | 899  | 98.6  | 7.12 | Isoform 2 of Fas-binding factor 1                                                              | 39.35  | 3 |        |   |
| IPI:IPI00930569.1 | 431  | 49.0  | 6.90 | Isoform 2 of F-box only protein 31                                                             | 50.69  | 3 | 32.99  | 2 |
| IPI:IPI00946784.1 | 699  | 79.7  | 7.66 | Isoform 2 of FERM domain-containing protein 7                                                  | 23.91  | 3 |        |   |
| IPI:IPI00654603.4 | 1843 | 212.5 | 5.97 | Isoform 2 of Girdin                                                                            | 68.50  | 3 | 116.77 | 2 |
| IPI:IPI00913872.1 | 518  | 58.3  | 4.82 | Isoform 2 of Heat shock factor protein 2                                                       | 78.89  | 3 | 140.21 | 2 |
| IPI:IPI00759790.1 | 887  | 99.9  | 8.69 | Isoform 2 of Helicase-like transcription factor                                                | 57.07  | 3 | 56.54  | 3 |
| IPI:IPI00017764.2 | 895  | 99.5  | 9.29 | Isoform 2 of Inversin                                                                          | 41.82  | 3 |        |   |
| IPI:IPI00743820.3 | 348  | 40.2  | 5.31 | Isoform 2 of Leiomodin-3                                                                       | 36.17  | 3 |        |   |
| IPI:IPI00394879.6 | 1111 | 128.0 | 7.56 | Isoform 2 of Leucine-rich repeat-containing protein 9                                          | 50.35  | 3 |        |   |
| IPI:IPI00480046.2 | 1608 | 176.0 | 7.72 | Isoform 2 of Microtubule-associated serine/threonine-protein kinase 2                          | 48.83  | 3 | 49.13  | 2 |
| IPI:IPI00006196.3 | 2101 | 236.4 | 5.80 | Isoform 2 of Nuclear mitotic apparatus protein 1                                               | 77.46  | 3 | 78.40  | 4 |
| IPI:IPI00249305.5 | 2080 | 231.5 | 7.69 | Isoform 2 of Peroxisomal proliferator-activated receptor A-interacting complex 285 kDa protein | 44.21  | 3 |        |   |
| IPI:IPI00847550.1 | 1951 | 219.7 | 7.53 | Isoform 2 of PHD finger protein 3                                                              | 100.46 | 3 |        |   |
| IPI:IPI00479475.1 | 544  | 61.7  | 6.33 | Isoform 2 of POTE ankyrin domain family member B                                               | 26.24  | 3 | 12.32  | 2 |
| IPI:IPI00640671.3 | 1235 | 142.7 | 5.36 | Isoform 2 of Protein fantom                                                                    | 300.55 | 3 | 227.79 | 3 |
| IPI:IPI00398585.7 | 717  | 83.0  | 5.47 | Isoform 2 of Protein Hook homolog 2                                                            | 133.61 | 3 |        |   |
| IPI:IPI00854578.1 | 1327 | 153.0 | 5.57 | Isoform 2 of Protein QN1 homolog                                                               | 47.94  | 3 | 54.62  | 3 |
| IPI:IPI00794069.1 | 1591 | 182.7 | 5.43 | Isoform 2 of RB1-inducible coiled-coil protein 1                                               | 56.07  | 3 | 37.31  | 2 |
| IPI:IPI00942680.1 | 1038 | 119.0 | 8.41 | Isoform 2 of Regulating synaptic membrane exocytosis protein 2                                 | 35.43  | 3 | 24.51  | 2 |
| IPI:IPI01014949.1 | 722  | 81.4  | 8.69 | Isoform 2 of Rho GTPase-activating protein 28                                                  | 23.26  | 3 |        |   |
| IPI:IPI00335259.8 | 1528 | 170.5 | 6.40 | Isoform 2 of Rho GTPase-activating protein 7                                                   | 54.06  | 3 |        |   |

|                    |      |       |      |                                                                                               |        |   |        |   |
|--------------------|------|-------|------|-----------------------------------------------------------------------------------------------|--------|---|--------|---|
| IPI:IPI00032374.4  | 740  | 82.1  | 9.80 | Isoform 2 of Ribosomal RNA processing protein 1 homolog B                                     | 45.56  | 3 |        |   |
| IPI:IPI00177817.4  | 997  | 109.6 | 5.36 | Isoform 2 of Sarcoplasmic/endoplasmic reticulum calcium ATPase 2                              | 33.30  | 3 |        |   |
| IPI:IPI006555652.1 | 1056 | 116.5 | 5.72 | Isoform 2 of Selenocysteine insertion sequence-binding protein 2-like                         | 15.98  | 3 |        |   |
| IPI:IPI00639874.3  | 3521 | 395.1 | 6.32 | Isoform 2 of Serine/threonine-protein kinase SMG1                                             | 75.00  | 3 | 94.16  | 4 |
| IPI:IPI00844048.1  | 534  | 60.2  | 5.31 | Isoform 2 of SHC SH2 domain-binding protein 1-like protein                                    | 112.20 | 3 | 70.05  | 2 |
| IPI:IPI00219816.1  | 584  | 63.6  | 9.72 | Isoform 2 of Spastin                                                                          | 35.37  | 3 |        |   |
| IPI:IPI00333015.7  | 2155 | 251.2 | 5.53 | Isoform 2 of Spectrin beta chain, brain 1                                                     | 81.90  | 3 |        |   |
| IPI:IPI00337705.1  | 702  | 79.5  | 7.01 | Isoform 2 of Stonin-2                                                                         | 113.03 | 3 | 58.47  | 2 |
| IPI:IPI00465022.9  | 1917 | 215.6 | 7.01 | Isoform 2 of Structural maintenance of chromosomes flexible hinge domain-containing protein 1 | 80.09  | 3 | 46.64  | 4 |
| IPI:IPI00219504.1  | 952  | 109.2 | 5.15 | Isoform 2 of Ubiquitin carboxyl-terminal hydrolase 15                                         | 207.56 | 3 |        |   |
| IPI:IPI00167399.6  | 414  | 47.2  | 9.88 | Isoform 2 of Uncharacterized protein C1orf177                                                 | 147.74 | 3 | 144.82 | 2 |
| IPI:IPI00941339.3  | 1472 | 161.8 | 5.38 | Isoform 2 of Uncharacterized protein KIAA0586                                                 | 54.77  | 3 | 37.25  | 3 |
| IPI:IPI00966688.1  | 2073 | 224.4 | 9.09 | Isoform 2 of Uncharacterized protein KIAA2026                                                 | 57.77  | 3 | 100.07 | 2 |
| IPI:IPI00420061.3  | 3997 | 445.7 | 6.46 | Isoform 2 of Vacuolar protein sorting-associated protein 13B                                  | 74.43  | 3 |        |   |
| IPI:IPI00384709.4  | 419  | 48.6  | 9.16 | Isoform 2 of Zinc finger protein 610                                                          | 19.43  | 3 |        |   |
| IPI:IPI00216505.1  | 1743 | 197.5 | 6.54 | Isoform 3 of Afadin                                                                           | 214.92 | 3 |        |   |
| IPI:IPI00647647.2  | 1153 | 130.3 | 4.98 | Isoform 3 of AT-rich interactive domain-containing protein 4B                                 | 68.40  | 3 |        |   |
| IPI:IPI00940523.2  | 3538 | 387.1 | 5.85 | Isoform 3 of CUB and sushi domain-containing protein 3                                        | 31.72  | 3 | 22.63  | 2 |
| IPI:IPI00743497.3  | 703  | 79.6  | 7.12 | Isoform 3 of EF-hand domain-containing family member B                                        | 26.53  | 3 |        |   |
| IPI:IPI00939203.2  | 457  | 49.7  | 8.06 | Isoform 3 of G-protein-signaling modulator 1                                                  | 100.25 | 3 |        |   |
| IPI:IPI00412862.4  | 1780 | 206.0 | 5.77 | Isoform 3 of Kinesin-like protein KIF20B                                                      | 70.61  | 3 | 64.75  | 2 |
| IPI:IPI00945485.1  | 509  | 58.3  | 8.32 | Isoform 3 of Leucine-rich glioma-inactivated protein 1                                        | 15.64  | 3 |        |   |
| IPI:IPI00291802.4  | 1349 | 153.6 | 7.75 | Isoform 3 of LIM domain only protein 7                                                        | 62.66  | 3 | 41.58  | 3 |
| IPI:IPI00166518.6  | 1000 | 114.0 | 6.35 | Isoform 3 of Myosin phosphatase Rho-interacting protein                                       | 28.92  | 3 |        |   |
| IPI:IPI00855756.1  | 592  | 66.4  | 5.48 | Isoform 3 of NMDA receptor-regulated protein 2                                                | 29.31  | 3 | 16.07  | 2 |
| IPI:IPI00455174.3  | 1835 | 206.3 | 6.28 | Isoform 3 of Ral GTPase-activating protein subunit alpha-2                                    | 45.90  | 3 | 32.77  | 2 |
| IPI:IPI00410120.1  | 1490 | 166.3 | 6.79 | Isoform 3 of Ral GTPase-activating protein subunit beta                                       | 81.67  | 3 | 51.30  | 3 |



|                   |      |       |      |                                                                         |        |   |       |   |
|-------------------|------|-------|------|-------------------------------------------------------------------------|--------|---|-------|---|
| IPI:IPI00642165.1 | 1638 | 186.0 | 6.33 | Isoform 3 of Serine/threonine-protein kinase MRCK alpha                 | 25.99  | 3 | 17.80 | 2 |
| IPI:IPI00746613.3 | 3135 | 355.6 | 6.39 | Isoform 3 of Vacuolar protein sorting-associated protein 13A            | 78.36  | 3 |       |   |
| IPI:IPI00221217.3 | 531  | 62.0  | 9.09 | Isoform 3 of Zinc finger protein 189                                    | 43.94  | 3 | 25.11 | 2 |
| IPI:IPI00398257.2 | 1208 | 132.8 | 6.99 | Isoform 4 of Activating molecule in BECN1-regulated autophagy protein 1 | 13.80  | 3 |       |   |
| IPI:IPI00793082.2 | 1643 | 191.2 | 4.89 | Isoform 4 of A-kinase anchor protein 9                                  | 83.29  | 3 | 84.82 | 2 |
| IPI:IPI00742937.1 | 2231 | 236.4 | 6.64 | Isoform 4 of AT-rich interactive domain-containing protein 1B           | 48.03  | 3 | 34.06 | 2 |
| IPI:IPI00929198.1 | 1972 | 220.6 | 6.37 | Isoform 4 of Bromodomain adjacent to zinc finger domain protein 2B      | 186.70 | 3 |       |   |
| IPI:IPI00220594.2 | 1650 | 187.7 | 7.94 | Isoform 4 of Intersectin-1                                              | 86.50  | 3 |       |   |
| IPI:IPI00027381.6 | 1722 | 198.2 | 6.67 | Isoform 4 of Lymphocyte antigen 75                                      | 60.39  | 3 | 22.68 | 2 |
| IPI:IPI00872269.2 | 2365 | 254.8 | 8.94 | Isoform 4 of Neuron navigator 2                                         | 55.01  | 3 | 37.26 | 3 |
| IPI:IPI00218126.1 | 372  | 42.4  | 9.35 | Isoform 4 of Neurotrophin receptor-interacting factor homolog           | 133.03 | 3 |       |   |
| IPI:IPI00792687.3 | 1074 | 122.8 | 6.32 | Isoform 4 of Probable guanine nucleotide exchange factor MCF2L2         | 18.99  | 3 | 25.62 | 2 |
| IPI:IPI00217178.6 | 2149 | 236.7 | 6.39 | Isoform 4 of Protein PRR14L                                             | 70.45  | 3 | 35.98 | 2 |
| IPI:IPI00219106.1 | 1376 | 149.5 | 7.50 | Isoform 4 of Regulator of G-protein signaling 12                        | 46.12  | 3 |       |   |
| IPI:IPI00760588.2 | 931  | 103.6 | 8.66 | Isoform 5 of Double-stranded RNA-specific adenosine deaminase           | 51.09  | 3 |       |   |
| IPI:IPI00216264.2 | 1416 | 158.8 | 7.36 | Isoform 5 of Multidrug resistance-associated protein 1                  | 39.49  | 3 | 20.40 | 2 |
| IPI:IPI00478622.2 | 513  | 59.8  | 7.01 | Isoform 5 of Outer dense fiber protein 2-like                           | 100.75 | 3 | 92.81 | 4 |
| IPI:IPI00328378.1 | 704  | 81.6  | 5.82 | Isoform 6 of NEDD4-like E3 ubiquitin-protein ligase WWP1                | 47.94  | 3 |       |   |
| IPI:IPI00398781.3 | 856  | 99.1  | 8.22 | Isoform 6 of Protein polybromo-1                                        | 27.60  | 3 | 38.58 | 2 |
| IPI:IPI00289944.6 | 2320 | 262.8 | 8.46 | Isoform A of Bromodomain and WD repeat-containing protein 1             | 59.63  | 3 |       |   |
| IPI:IPI00012363.3 | 1194 | 132.3 | 6.70 | Isoform Alpha of Metabotropic glutamate receptor 1                      | 24.83  | 3 |       |   |
| IPI:IPI00218042.1 | 622  | 70.4  | 7.96 | Isoform BMP1-5 of Bone morphogenetic protein 1                          | 37.76  | 3 |       |   |
| IPI:IPI00165189.5 | 676  | 79.7  | 8.82 | Isoform CDV-1R of Intraflagellar transport protein 81 homolog           | 40.14  | 3 | 48.92 | 3 |
| IPI:IPI00018335.4 | 1338 | 150.7 | 8.38 | Isoform Flt1 of Vascular endothelial growth factor receptor 1           | 20.19  | 3 |       |   |
| IPI:IPI00236554.1 | 650  | 73.8  | 9.11 | Isoform H14 of Myeloperoxidase                                          | 29.54  | 3 |       |   |
| IPI:IPI00220332.8 | 150  | 16.7  | 4.68 | Isoform MLC3 of Myosin light chain 1/3, skeletal muscle isoform         | 38.46  | 3 | 9.47  | 2 |

|                   |      |       |       |                                                                       |        |   |        |   |
|-------------------|------|-------|-------|-----------------------------------------------------------------------|--------|---|--------|---|
| IPI:IPI00759723.1 | 588  | 67.1  | 6.55  | Isoform Monomeric of Arginyl-tRNA synthetase, cytoplasmic             | 35.29  | 3 | 20.70  | 2 |
| IPI:IPI00337568.3 | 1298 | 145.5 | 6.29  | Isoform Short of Vascular endothelial growth factor receptor 3        | 30.74  | 3 |        |   |
| IPI:IPI00220833.1 | 727  | 84.9  | 5.55  | Isoform UBF2 of Nucleolar transcription factor 1                      | 45.58  | 3 | 34.98  | 4 |
| IPI:IPI00173461.1 | 661  | 71.6  | 9.32  | Junctophilin-1                                                        | 52.72  | 3 | 34.89  | 3 |
| IPI:IPI00827637.1 | 110  | 12.0  | 6.60  | K light chain variable region (Fragment)                              | 116.42 | 3 | 51.87  | 2 |
| IPI:IPI00384444.6 | 472  | 51.5  | 5.16  | Keratin, type I cytoskeletal 14                                       | 20.47  | 3 | 19.41  | 3 |
| IPI:IPI00450768.7 | 432  | 48.1  | 5.02  | Keratin, type I cytoskeletal 17                                       | 22.67  | 3 | 18.24  | 2 |
| IPI:IPI01013038.1 | 1621 | 180.6 | 6.33  | kinesin-like protein KIF21A isoform 4                                 | 47.25  | 3 | 41.97  | 2 |
| IPI:IPI00377045.4 | 3335 | 366.7 | 7.24  | Laminin alpha-3 chain variant 1                                       | 78.56  | 3 | 51.55  | 3 |
| IPI:IPI00793299.2 | 903  | 96.7  | 6.21  | large proline-rich protein BAG6 isoform c                             | 15.29  | 3 | 12.44  | 2 |
| IPI:IPI00955949.1 | 414  | 48.5  | 5.05  | Leucine rich repeat containing 48, isoform CRA_a                      | 32.07  | 3 |        |   |
| IPI:IPI00002070.6 | 810  | 94.1  | 7.94  | Leucine-rich repeat-containing protein 8A                             | 27.89  | 3 | 15.64  | 2 |
| IPI:IPI00253050.2 | 865  | 98.8  | 4.93  | LINE-1 type transposase domain-containing protein 1                   | 106.48 | 3 | 40.79  | 2 |
| IPI:IPI00827617.1 | 315  | 40.5  | 4.81  | LOC283685 protein                                                     | 102.05 | 3 | 83.03  | 3 |
| IPI:IPI00020986.2 | 338  | 38.4  | 6.61  | Lumican                                                               | 31.39  | 3 |        |   |
| IPI:IPI00377170.1 | 355  | 40.6  | 8.85  | male-specific lethal 3 homolog isoform c                              | 44.07  | 3 | 32.05  | 2 |
| IPI:IPI00220143.4 | 1857 | 209.7 | 5.50  | Maltase-glucoamylase, intestinal                                      | 55.51  | 3 |        |   |
| IPI:IPI00012347.7 | 2828 | 312.0 | 8.32  | Matrix-remodeling-associated protein 5                                | 55.40  | 3 | 48.56  | 2 |
| IPI:IPI00976506.1 | 1809 | 203.7 | 7.59  | MED12L protein                                                        | 165.53 | 3 | 206.20 | 3 |
| IPI:IPI00289940.2 | 346  | 39.2  | 10.07 | Melanoma-associated antigen B3                                        | 99.56  | 3 |        |   |
| IPI:IPI00969510.1 | 3314 | 362.4 | 6.13  | MLL3 protein (Fragment)                                               | 95.82  | 3 |        |   |
| IPI:IPI00873776.1 | 970  | 110.7 | 8.63  | MORC family CW-type zinc finger 2, isoform CRA_a                      | 27.10  | 3 | 32.39  | 3 |
| IPI:IPI01014189.1 | 4641 | 510.1 | 7.06  | MYC binding protein 2                                                 | 90.38  | 3 | 69.63  | 4 |
| IPI:IPI00307425.5 | 972  | 108.6 | 7.05  | myelin gene regulatory factor                                         | 29.96  | 3 | 46.69  | 2 |
| IPI:IPI00007856.1 | 1941 | 222.9 | 5.82  | Myosin-2                                                              | 72.53  | 3 |        |   |
| IPI:IPI00298301.4 | 1940 | 223.8 | 5.81  | Myosin-3                                                              | 35.70  | 3 |        |   |
| IPI:IPI00514201.4 | 1939 | 223.6 | 5.73  | Myosin-6                                                              | 93.04  | 3 | 43.57  | 2 |
| IPI:IPI00025880.2 | 1935 | 223.0 | 5.80  | Myosin-7                                                              | 69.65  | 3 | 53.49  | 3 |
| IPI:IPI00642716.6 | 1983 | 225.7 | 6.14  | myosin-7B                                                             | 75.39  | 3 |        |   |
| IPI:IPI00384400.1 | 122  | 13.6  | 8.46  | Myosin-reactive immunoglobulin heavy chain variable region (Fragment) | 57.67  | 3 |        |   |
| IPI:IPI00396185.2 | 725  | 83.6  | 7.05  | N-alpha-acetyltransferase 35, NatC auxiliary subunit                  | 79.47  | 3 | 71.80  | 4 |
| IPI:IPI00828156.1 | 121  | 13.1  | 9.95  | NANUC-1 heavy chain (Fragment)                                        | 65.62  | 3 | 41.72  | 2 |
| IPI:IPI00793989.2 | 1077 | 122.4 | 6.62  | nck-associated protein 1-like isoform 2                               | 36.90  | 3 |        |   |
| IPI:IPI00041960.3 | 1214 | 139.3 | 4.78  | Neuroblastoma breakpoint family member 1                              | 32.79  | 3 |        |   |
| IPI:IPI00783781.2 | 2012 | 227.8 | 6.19  | Nuclear pore complex protein Nup205                                   | 49.95  | 3 | 48.59  | 2 |
| IPI:IPI00742682.2 | 2363 | 267.1 | 5.02  | Nucleoprotein TPR                                                     | 105.75 | 3 | 100.84 | 6 |

|                   |      |       |      |                                                                            |        |   |        |   |
|-------------------|------|-------|------|----------------------------------------------------------------------------|--------|---|--------|---|
| IPI:IPI00298057.3 | 1756 | 204.6 | 5.60 | Periplakin                                                                 | 71.64  | 3 |        |   |
| IPI:IPI00022426.1 | 352  | 39.0  | 6.25 | Protein AMBP                                                               | 34.25  | 3 | 26.36  | 4 |
| IPI:IPI00004425.2 | 1156 | 120.9 | 8.69 | Protein C15orf2                                                            | 20.43  | 3 |        |   |
| IPI:IPI00167861.3 | 1016 | 113.9 | 5.91 | Protein SMG5                                                               | 13.52  | 3 |        |   |
| IPI:IPI00155168.2 | 1145 | 131.0 | 6.33 | Protein tyrosine phosphatase, receptor type, C                             | 29.85  | 3 |        |   |
| IPI:IPI00302641.2 | 4349 | 479.0 | 5.16 | Protocadherin Fat 2                                                        | 64.47  | 3 |        |   |
| IPI:IPI00888712.3 | 375  | 42.0  | 6.33 | Putative beta-actin-like protein 3                                         | 19.75  | 3 |        |   |
| IPI:IPI00008091.2 | 1556 | 176.6 | 9.50 | Putative DNA helicase INO80 complex homolog 1                              | 89.41  | 3 |        |   |
| IPI:IPI00786880.4 | 1530 | 167.0 | 8.41 | Putative myosin-XVB                                                        | 56.26  | 3 | 35.78  | 2 |
| IPI:IPI00887016.1 | 358  | 38.0  | 4.93 | Putative protein phosphatase 1 regulatory inhibitor subunit 3G             | 9.60   | 3 |        |   |
| IPI:IPI00893035.1 | 2162 | 235.9 | 6.55 | Putative uncharacterized protein CAD                                       | 44.17  | 3 | 40.23  | 2 |
| IPI:IPI01009989.1 | 667  | 73.3  | 5.29 | Putative uncharacterized protein DKFZp686I11137                            | 18.75  | 3 |        |   |
| IPI:IPI00943552.1 | 400  | 46.5  | 9.01 | Putative upstream-binding factor 1-like protein 6                          | 20.84  | 3 |        |   |
| IPI:IPI00007057.4 | 784  | 88.8  | 5.50 | Rabenosyn-5                                                                | 37.59  | 3 |        |   |
| IPI:IPI00922543.2 | 490  | 54.9  | 9.03 | ran-binding protein 3-like isoform 1                                       | 30.46  | 3 |        |   |
| IPI:IPI01010914.1 | 1608 | 184.6 | 7.12 | Rearranged L-myc fusion sequence variant (Fragment)                        | 57.80  | 3 | 51.91  | 2 |
| IPI:IPI00008531.1 | 482  | 53.0  | 7.03 | REST corepressor 1                                                         | 45.07  | 3 | 58.35  | 2 |
| IPI:IPI00480192.1 | 199  | 22.9  | 6.09 | Retinol binding protein 4, plasma                                          | 60.38  | 3 |        |   |
| IPI:IPI00829956.1 | 116  | 12.5  | 8.46 | Rheumatoid factor C6 light chain (Fragment)                                | 51.77  | 3 | 29.34  | 3 |
| IPI:IPI00816799.1 | 118  | 12.8  | 8.97 | Rheumatoid factor D5 light chain (Fragment)                                | 31.45  | 3 | 22.57  | 2 |
| IPI:IPI00303832.6 | 710  | 80.3  | 8.15 | RNA polymerase-associated protein RTF1 homolog                             | 22.20  | 3 |        |   |
| IPI:IPI00894222.2 | 1590 | 175.6 | 6.84 | rootletin                                                                  | 61.95  | 3 | 39.53  | 2 |
| IPI:IPI00398957.6 | 1076 | 115.0 | 6.48 | Serine/threonine-protein phosphatase 6 regulatory ankyrin repeat subunit C | 10.42  | 3 |        |   |
| IPI:IPI00022391.1 | 223  | 25.4  | 6.54 | Serum amyloid P-component                                                  | 15.96  | 3 | 24.16  | 4 |
| IPI:IPI00044147.1 | 804  | 92.2  | 8.38 | short transient receptor potential channel 4 isoform zeta                  | 20.11  | 3 |        |   |
| IPI:IPI00740180.2 | 1197 | 134.5 | 5.24 | Similar to Dual specificity phosphatase 27                                 | 29.90  | 3 |        |   |
| IPI:IPI00976928.1 | 104  | 11.3  | 7.97 | Similar to Myosin-reactive immunoglobulin heavy chain variable region      | 81.21  | 3 | 33.53  | 3 |
| IPI:IPI00294603.6 | 1379 | 155.1 | 6.68 | Similar to Zinc finger MYM-type protein 5                                  | 27.90  | 3 |        |   |
| IPI:IPI00470652.1 | 244  | 26.1  | 8.40 | Single-chain Fv (Fragment)                                                 | 151.84 | 3 | 70.22  | 2 |
| IPI:IPI00328118.4 | 1193 | 134.3 | 5.00 | Sperm-associated antigen 5                                                 | 619.06 | 3 | 599.48 | 3 |
| IPI:IPI00291939.1 | 1233 | 143.1 | 7.64 | Structural maintenance of chromosomes protein 1A                           | 87.20  | 3 |        |   |
| IPI:IPI01014975.1 | 2429 | 257.9 | 6.49 | Talin 1                                                                    | 79.34  | 3 | 51.69  | 3 |
| IPI:IPI00056511.1 | 418  | 48.3  | 6.37 | Tektin-1                                                                   | 25.63  | 3 | 19.43  | 2 |
| IPI:IPI00892681.1 | 4222 | 455.9 | 5.20 | Tenascin XB                                                                | 59.04  | 3 | 55.33  | 3 |
| IPI:IPI00302966.5 | 1141 | 129.5 | 6.58 | Tetratricopeptide repeat protein 17                                        | 35.95  | 3 | 21.66  | 2 |

|                   |      |       |       |                                                               |        |   |        |   |
|-------------------|------|-------|-------|---------------------------------------------------------------|--------|---|--------|---|
| IPI:IPI00642204.3 | 825  | 93.5  | 5.21  | Thioredoxin domain-containing protein 16                      | 29.76  | 3 |        |   |
| IPI:IPI00009812.1 | 1049 | 120.8 | 8.21  | Toll-like receptor 7                                          | 70.46  | 3 | 73.14  | 2 |
| IPI:IPI00335051.1 | 1059 | 121.7 | 6.77  | Toll-like receptor 8, isoform CRA_a                           | 131.77 | 3 | 111.62 | 2 |
| IPI:IPI00029263.2 | 822  | 94.6  | 7.14  | Tyrosine-protein kinase Fer                                   | 57.34  | 3 |        |   |
| IPI:IPI00784013.1 | 1154 | 133.2 | 7.55  | Tyrosine-protein kinase JAK1                                  | 24.96  | 3 |        |   |
| IPI:IPI00828099.1 | 121  | 13.1  | 7.94  | UGa8H (Fragment)                                              | 189.22 | 3 | 95.80  | 3 |
| IPI:IPI00940315.1 | 4244 | 465.6 | 6.10  | Uncharacterized protein                                       | 102.87 | 3 |        |   |
| IPI:IPI00289258.7 | 1415 | 163.5 | 6.21  | Uncharacterized protein                                       | 166.27 | 3 | 108.43 | 2 |
| IPI:IPI00385005.3 | 1607 | 183.2 | 5.53  | Uncharacterized protein                                       | 125.33 | 3 | 118.33 | 6 |
| IPI:IPI00910052.2 | 618  | 70.5  | 5.40  | Uncharacterized protein                                       | 19.02  | 3 |        |   |
| IPI:IPI00007227.5 | 703  | 75.3  | 9.36  | Uncharacterized protein                                       | 38.25  | 3 | 37.51  | 3 |
| IPI:IPI00936881.1 | 1248 | 138.8 | 5.39  | Uncharacterized protein                                       | 95.72  | 3 | 29.60  | 2 |
| IPI:IPI00011986.8 | 3197 | 361.5 | 6.99  | Uncharacterized protein                                       | 106.33 | 3 |        |   |
| IPI:IPI00794134.1 | 1165 | 134.3 | 7.58  | Uncharacterized protein                                       | 41.29  | 3 |        |   |
| IPI:IPI00917127.1 | 512  | 58.9  | 6.90  | Uncharacterized protein                                       | 47.25  | 3 |        |   |
| IPI:IPI00910161.2 | 932  | 104.8 | 5.35  | Uncharacterized protein                                       | 37.09  | 3 | 24.88  | 2 |
| IPI:IPI00977985.1 | 924  | 106.8 | 4.64  | Uncharacterized protein                                       | 32.35  | 3 | 40.23  | 3 |
| IPI:IPI00657721.1 | 493  | 54.7  | 5.78  | Uncharacterized protein                                       | 25.89  | 3 |        |   |
| IPI:IPI00796770.1 | 481  | 52.7  | 6.05  | Uncharacterized protein                                       | 13.62  | 3 |        |   |
| IPI:IPI00978018.1 | 2343 | 258.8 | 6.95  | Uncharacterized protein                                       | 57.33  | 3 |        |   |
| IPI:IPI00968217.1 | 788  | 88.8  | 6.20  | Uncharacterized protein                                       | 35.53  | 3 | 17.02  | 2 |
| IPI:IPI00644982.4 | 125  | 13.6  | 7.40  | Uncharacterized protein                                       | 19.24  | 3 |        |   |
| IPI:IPI00964761.1 | 693  | 74.9  | 5.07  | Uncharacterized protein                                       | 14.81  | 3 |        |   |
| IPI:IPI00984335.1 | 1326 | 150.8 | 6.95  | Uncharacterized protein                                       | 88.16  | 3 |        |   |
| IPI:IPI00979742.1 | 556  | 62.6  | 7.74  | Uncharacterized protein                                       | 14.47  | 3 |        |   |
| IPI:IPI00978941.1 | 2500 | 280.6 | 6.29  | Uncharacterized protein                                       | 47.28  | 3 |        |   |
| IPI:IPI00947080.1 | 898  | 103.6 | 6.27  | Uncharacterized protein C10orf118                             | 75.84  | 3 | 104.68 | 3 |
| IPI:IPI00783299.2 | 445  | 49.2  | 6.25  | Uncharacterized protein C10orf88                              | 39.23  | 3 |        |   |
| IPI:IPI00395940.8 | 531  | 60.7  | 8.91  | Uncharacterized protein C9orf102                              | 32.56  | 3 |        |   |
| IPI:IPI00009329.2 | 3433 | 394.2 | 5.33  | Utrophin                                                      | 104.41 | 3 | 64.08  | 4 |
| IPI:IPI00166132.3 | 723  | 82.2  | 5.99  | Vacuolar protein sorting-associated protein 52 homolog        | 54.47  | 3 | 52.06  | 2 |
| IPI:IPI00827581.1 | 131  | 13.9  | 8.79  | Variable immunoglobulin anti-estradiol heavy chain (Fragment) | 142.81 | 3 | 73.36  | 3 |
| IPI:IPI00023014.3 | 2813 | 309.1 | 5.48  | von Willebrand factor                                         | 69.10  | 3 |        |   |
| IPI:IPI00477886.3 | 466  | 51.7  | 6.16  | WUGSC:H_DJ1086D14.1 protein (Fragment)                        | 70.51  | 3 | 43.39  | 3 |
| IPI:IPI00382445.3 | 1152 | 127.0 | 4.23  | X-linked retinitis pigmentosa GTPase regulator isoform C      | 37.25  | 3 |        |   |
| IPI:IPI00479597.3 | 670  | 76.8  | 8.25  | Zinc finger protein 233                                       | 239.03 | 3 | 88.27  | 3 |
| IPI:IPI00644680.2 | 3925 | 409.9 | 7.72  | Zinc finger protein 469                                       | 59.89  | 3 | 53.49  | 2 |
| IPI:IPI00023319.1 | 318  | 35.0  | 9.35  | 11-cis retinol dehydrogenase                                  | 6.53   | 2 |        |   |
| IPI:IPI01013555.1 | 1102 | 119.6 | 8.31  | 120 kDa protein                                               | 19.79  | 2 |        |   |
| IPI:IPI01009917.1 | 1103 | 124.2 | 8.56  | 124 kDa protein                                               | 36.80  | 2 |        |   |
| IPI:IPI00829590.1 | 119  | 13.2  | 7.85  | 13 kDa protein                                                | 52.77  | 2 |        |   |
| IPI:IPI00964788.1 | 116  | 13.5  | 10.81 | 13 kDa protein                                                | 15.20  | 2 |        |   |
| IPI:IPI00165173.4 | 124  | 13.9  | 9.85  | 14 kDa protein                                                | 105.44 | 2 |        |   |
| IPI:IPI01015947.1 | 1442 | 162.9 | 6.30  | 163 kDa protein                                               | 65.28  | 2 | 37.18  | 2 |
| IPI:IPI01011208.1 | 165  | 18.9  | 6.77  | 19 kDa protein                                                | 49.95  | 2 |        |   |
| IPI:IPI00418194.4 | 1780 | 197.8 | 5.77  | 198 kDa protein                                               | 25.61  | 2 |        |   |

|                   |      |       |       |                                                                                        |        |   |        |   |
|-------------------|------|-------|-------|----------------------------------------------------------------------------------------|--------|---|--------|---|
| IPI:IPI00181283.2 | 1167 | 131.1 | 5.88  | 1-phosphatidylinositol-4,5-bisphosphate phosphodiesterase beta-3 isoform 2             | 84.08  | 2 |        |   |
| IPI:IPI00329185.5 | 1265 | 147.8 | 6.64  | 1-phosphatidylinositol-4,5-bisphosphate phosphodiesterase gamma-2                      | 48.66  | 2 | 35.32  | 2 |
| IPI:IPI00964673.1 | 179  | 20.8  | 8.76  | 21 kDa protein                                                                         | 99.96  | 2 |        |   |
| IPI:IPI01013282.1 | 221  | 25.0  | 8.41  | 25 kDa protein                                                                         | 51.40  | 2 | 22.51  | 2 |
| IPI:IPI00926977.1 | 403  | 45.8  | 7.78  | 26S protease regulatory subunit 10B                                                    | 11.37  | 2 | 18.04  | 2 |
| IPI:IPI00006440.7 | 242  | 28.1  | 9.99  | 28S ribosomal protein S7, mitochondrial                                                | 16.72  | 2 |        |   |
| IPI:IPI01012523.1 | 265  | 30.0  | 5.25  | 30 kDa protein                                                                         | 8.08   | 2 |        |   |
| IPI:IPI01010440.1 | 327  | 37.3  | 6.81  | 37 kDa protein                                                                         | 18.79  | 2 |        |   |
| IPI:IPI00939652.2 | 347  | 40.2  | 4.94  | 40 kDa protein                                                                         | 33.56  | 2 |        |   |
| IPI:IPI01009675.1 | 350  | 40.1  | 8.09  | 40 kDa protein                                                                         | 15.97  | 2 |        |   |
| IPI:IPI01012362.1 | 353  | 41.2  | 10.36 | 41 kDa protein                                                                         | 48.80  | 2 |        |   |
| IPI:IPI01014832.1 | 411  | 47.9  | 6.04  | 48 kDa protein                                                                         | 16.32  | 2 |        |   |
| IPI:IPI01012747.1 | 447  | 48.3  | 7.08  | 48 kDa protein                                                                         | 19.51  | 2 |        |   |
| IPI:IPI00794711.1 | 479  | 54.0  | 6.38  | 54 kDa protein                                                                         | 13.28  | 2 |        |   |
| IPI:IPI00952578.2 | 495  | 55.7  | 8.27  | 56 kDa protein                                                                         | 182.13 | 2 |        |   |
| IPI:IPI00942926.2 | 387  | 43.9  | 8.37  | 5-hydroxytryptamine receptor 2A isoform 2                                              | 29.28  | 2 |        |   |
| IPI:IPI00219160.3 | 117  | 13.3  | 11.47 | 60S ribosomal protein L34                                                              | 25.34  | 2 |        |   |
| IPI:IPI00478618.1 | 434  | 49.7  | 7.39  | 6-phosphofructo-2-kinase/fructose-2, 6-biphosphatase 4 splice isoform 5                | 13.88  | 2 |        |   |
| IPI:IPI00935699.2 | 676  | 72.4  | 8.97  | 72 kDa protein                                                                         | 31.48  | 2 | 13.72  | 2 |
| IPI:IPI01011655.1 | 77   | 8.4   | 6.64  | 8 kDa protein                                                                          | 52.68  | 2 | 52.83  | 2 |
| IPI:IPI01010120.1 | 842  | 91.9  | 5.25  | 92 kDa protein                                                                         | 9.56   | 2 | 14.79  | 2 |
| IPI:IPI00940817.2 | 812  | 93.6  | 6.95  | 94 kDa protein                                                                         | 14.44  | 2 |        |   |
| IPI:IPI00064462.2 | 337  | 38.5  | 8.57  | Abhydrolase domain-containing protein 13                                               | 17.54  | 2 |        |   |
| IPI:IPI00455786.3 | 702  | 79.2  | 8.32  | Actin binding LIM protein 1                                                            | 14.64  | 2 | 20.62  | 2 |
| IPI:IPI00333068.4 | 370  | 41.5  | 8.18  | Actin-related protein 2/3 complex subunit 1A                                           | 30.24  | 2 |        |   |
| IPI:IPI00386839.1 | 116  | 12.3  | 5.01  | Amyloid lambda 6 light chain variable region SAR (Fragment)                            | 18.00  | 2 |        |   |
| IPI:IPI00384662.3 | 1820 | 208.9 | 7.62  | amyotrophic lateral sclerosis 2 chromosomal region candidate gene 11 protein isoform 1 | 70.65  | 2 | 94.67  | 3 |
| IPI:IPI00033907.1 | 1944 | 216.4 | 6.30  | Anaphase-promoting complex subunit 1                                                   | 37.10  | 2 | 36.03  | 2 |
| IPI:IPI00007088.6 | 185  | 21.2  | 9.06  | Anaphase-promoting complex subunit 10                                                  | 16.38  | 2 |        |   |
| IPI:IPI00967485.1 | 951  | 106.8 | 5.97  | ankycorbin isoform b                                                                   | 80.24  | 2 | 15.96  | 2 |
| IPI:IPI00300452.1 | 776  | 86.6  | 8.28  | Ankyrin repeat domain-containing protein 5                                             | 13.69  | 2 |        |   |
| IPI:IPI00973246.2 | 614  | 68.4  | 7.18  | ankyrin repeat domain-containing protein 55                                            | 34.53  | 2 | 31.04  | 3 |
| IPI:IPI00253323.3 | 525  | 55.6  | 7.03  | Ankyrin repeat domain-containing protein 57                                            | 16.71  | 2 | 7.00   | 2 |
| IPI:IPI00976730.1 | 917  | 106.5 | 6.89  | ankyrin repeat domain-containing protein 62 isoform 1                                  | 141.52 | 2 | 106.35 | 4 |

|                   |      |       |      |                                                                                                                  |        |   |        |   |
|-------------------|------|-------|------|------------------------------------------------------------------------------------------------------------------|--------|---|--------|---|
| IPI:IPI00103340.1 | 475  | 53.4  | 5.87 | Ankyrin repeat, SAM and basic leucine zipper domain-containing protein 1                                         | 138.14 | 2 |        |   |
| IPI:IPI00828105.1 | 239  | 25.2  | 8.63 | Anti-Mpl scFv (Fragment)                                                                                         | 81.96  | 2 | 48.20  | 3 |
| IPI:IPI00021857.1 | 99   | 10.8  | 5.41 | Apolipoprotein C-III                                                                                             | 19.72  | 2 | 37.76  | 2 |
| IPI:IPI00292471.3 | 1704 | 193.3 | 7.39 | Arf-GAP with Rho-GAP domain, ANK repeat and PH domain-containing protein 2                                       | 70.86  | 2 | 70.28  | 2 |
| IPI:IPI00643365.2 | 492  | 55.6  | 8.48 | Asparagine-linked glycosylation protein 11 homolog                                                               | 78.61  | 2 | 103.67 | 4 |
| IPI:IPI00939720.2 | 4857 | 529.9 | 6.05 | Baculoviral IAP repeat-containing protein 6                                                                      | 32.53  | 2 | 60.17  | 2 |
| IPI:IPI00655628.1 | 88   | 10.1  | 8.47 | Beta-defensin 115                                                                                                | 18.06  | 2 |        |   |
| IPI:IPI00009811.1 | 450  | 52.7  | 6.54 | Bifunctional apoptosis regulator                                                                                 | 33.98  | 2 |        |   |
| IPI:IPI00797574.3 | 3051 | 330.3 | 5.08 | Biorientation of chromosomes in cell division protein 1-like                                                     | 66.50  | 2 | 49.30  | 3 |
| IPI:IPI00030115.1 | 424  | 48.0  | 5.00 | Bone morphogenetic protein 10                                                                                    | 40.53  | 2 | 38.89  | 2 |
| IPI:IPI00880042.1 | 74   | 8.2   | 9.52 | Bromodomain containing 3                                                                                         | 12.85  | 2 |        |   |
| IPI:IPI00908918.1 | 335  | 37.1  | 4.44 | BSD domain-containing protein 1 isoform d                                                                        | 9.80   | 2 |        |   |
| IPI:IPI00101299.3 | 318  | 36.4  | 6.84 | C1GALT1-specific chaperone 1                                                                                     | 31.18  | 2 |        |   |
| IPI:IPI00869011.2 | 1154 | 133.2 | 6.09 | Caspase recruitment domain-containing protein 11                                                                 | 49.18  | 2 |        |   |
| IPI:IPI00795933.3 | 1032 | 118.4 | 7.09 | cDNA FLJ12938 fis, clone NT2RP2005022, highly similar to Intraflagellar transport 122 homolog                    | 45.74  | 2 |        |   |
| IPI:IPI00902705.1 | 498  | 55.8  | 8.54 | cDNA FLJ14823 fis, clone OVARC1000649, highly similar to Growth factor receptor-bound protein 7                  | 30.02  | 2 |        |   |
| IPI:IPI00902776.1 | 831  | 92.6  | 7.42 | cDNA FLJ16199 fis, clone CTONG1000241, highly similar to RING finger protein 31                                  | 57.66  | 2 | 21.16  | 2 |
| IPI:IPI00967983.2 | 165  | 18.2  | 9.61 | cDNA FLJ16260 fis, clone IMR322006947, highly similar to Heart- and neural crest derivatives-expressed protein 2 | 21.86  | 2 |        |   |
| IPI:IPI00442921.1 | 424  | 48.4  | 7.77 | CDNA FLJ26213 fis, clone ADG07906                                                                                | 32.56  | 2 | 10.96  | 2 |
| IPI:IPI00784196.3 | 280  | 31.0  | 6.87 | cDNA FLJ30033 fis, clone 3NB692001433, highly similar to HEAT repeat-containing protein 2                        | 20.89  | 2 |        |   |
| IPI:IPI01014586.1 | 429  | 46.2  | 9.28 | cDNA FLJ33413 fis, clone BRACE2019528, highly similar to Cytoplasmic linker protein 170-related 59 kDa protein   | 17.76  | 2 |        |   |
| IPI:IPI00903275.1 | 405  | 46.0  | 7.68 | cDNA FLJ33599 fis, clone BRAMY2013736, highly similar to 5'-nucleotidase domain-containing protein 1             | 8.04   | 2 |        |   |
| IPI:IPI00943063.1 | 525  | 58.9  | 7.17 | cDNA FLJ36521 fis, clone TRACH2002138, highly similar to Adenylate cyclase type 5                                | 140.94 | 2 |        |   |

|                   |      |       |      |                                                                                                                                   |       |   |       |   |
|-------------------|------|-------|------|-----------------------------------------------------------------------------------------------------------------------------------|-------|---|-------|---|
| IPI:IPI00167563.1 | 214  | 24.9  | 9.85 | cDNA FLJ38465 fis, clone FEBRA2021497                                                                                             | 25.07 | 2 |       |   |
| IPI:IPI00916219.1 | 230  | 26.4  | 7.78 | cDNA FLJ41015 fis, clone UTERU2018712, highly similar to COP9 signalosome complex subunit 7b                                      | 9.55  | 2 |       |   |
| IPI:IPI00446290.1 | 327  | 36.5  | 7.24 | cDNA FLJ42349 fis, clone UTERU2004688                                                                                             | 57.92 | 2 |       |   |
| IPI:IPI00902582.1 | 491  | 55.0  | 9.06 | cDNA FLJ44510 fis, clone UTERU3001652, highly similar to Leiomodrin-1                                                             | 19.02 | 2 |       |   |
| IPI:IPI01014743.1 | 934  | 107.9 | 6.05 | cDNA FLJ44514 fis, clone UTERU3002218                                                                                             | 36.39 | 2 | 16.42 | 2 |
| IPI:IPI01015075.1 | 332  | 37.7  | 5.27 | cDNA FLJ44951 fis, clone BRAWH2002333, highly similar to Calcium/calmodulin-dependent 3',5'-cyclicnucleotide phosphodiesterase 1B | 41.07 | 2 | 16.74 | 2 |
| IPI:IPI00444820.1 | 201  | 22.7  | 4.84 | cDNA FLJ45145 fis, clone BRAWH3041492, moderately similar to Homo sapiens erythrocyte membrane protein band 4.1                   | 15.44 | 2 |       |   |
| IPI:IPI00151888.5 | 1393 | 158.6 | 7.61 | cDNA FLJ45400 fis, clone BRHIP3028570                                                                                             | 40.00 | 2 | 45.98 | 3 |
| IPI:IPI00443474.1 | 456  | 50.9  | 6.16 | cDNA FLJ46716 fis, clone TRACH3018108, highly similar to 51 kDa FK506-binding protein                                             | 26.66 | 2 |       |   |
| IPI:IPI00902463.1 | 1058 | 117.3 | 5.90 | cDNA FLJ46898 fis, clone UTERU3022168, highly similar to Protein FAM62A                                                           | 50.59 | 2 | 60.86 | 2 |
| IPI:IPI00908828.1 | 263  | 30.6  | 8.29 | cDNA FLJ50375, highly similar to Serine/threonine-protein kinase RIO3                                                             | 10.50 | 2 |       |   |
| IPI:IPI00976787.1 | 826  | 92.1  | 7.74 | cDNA FLJ50542, highly similar to Glutamate receptor 1                                                                             | 9.92  | 2 | 12.30 | 2 |
| IPI:IPI01010078.1 | 544  | 63.2  | 9.31 | cDNA FLJ50832, moderately similar to Zinc finger protein 709                                                                      | 28.95 | 2 |       |   |
| IPI:IPI00967478.1 | 129  | 14.5  | 9.72 | cDNA FLJ51500, highly similar to Dihydrofolate reductase                                                                          | 23.95 | 2 | 14.20 | 2 |
| IPI:IPI00922087.1 | 612  | 67.6  | 8.10 | cDNA FLJ52356, highly similar to Armadillo repeat-containing protein 4                                                            | 91.44 | 2 |       |   |
| IPI:IPI00027599.6 | 453  | 51.1  | 7.65 | cDNA FLJ52357, highly similar to ATP-dependent RNA helicase DDX19B                                                                | 17.06 | 2 |       |   |
| IPI:IPI00965765.1 | 1071 | 122.7 | 6.98 | cDNA FLJ52376, highly similar to Ras GTPase-activating-like protein IQGAP2                                                        | 55.31 | 2 | 54.22 | 3 |
| IPI:IPI00924476.1 | 191  | 21.9  | 8.56 | cDNA FLJ52791, highly similar to Cleavage and polyadenylation specificityfactor 30 kDa subunit                                    | 18.00 | 2 |       |   |

|                   |      |       |       |                                                                                                                                   |        |   |        |   |
|-------------------|------|-------|-------|-----------------------------------------------------------------------------------------------------------------------------------|--------|---|--------|---|
| IPI:IPI00908375.1 | 409  | 45.0  | 9.25  | cDNA FLJ52821, highly similar to Protein transport protein Sec23A                                                                 | 21.42  | 2 |        |   |
| IPI:IPI00909097.1 | 263  | 28.3  | 8.60  | cDNA FLJ52850, moderately similar to Cold-inducible RNA-binding protein                                                           | 36.08  | 2 | 37.86  | 2 |
| IPI:IPI01009448.1 | 1008 | 107.6 | 7.61  | cDNA FLJ53521, highly similar to Pumilio homolog 2                                                                                | 22.33  | 2 | 23.69  | 2 |
| IPI:IPI00922078.1 | 170  | 18.6  | 11.66 | cDNA FLJ53557                                                                                                                     | 15.74  | 2 | 40.39  | 2 |
| IPI:IPI01009564.1 | 418  | 48.3  | 5.76  | cDNA FLJ53606, highly similar to RAC-alpha serine/threonine-protein kinase                                                        | 15.96  | 2 |        |   |
| IPI:IPI01015386.1 | 1075 | 121.5 | 5.91  | cDNA FLJ53944, highly similar to Eukaryotic translation initiation factor 4 gamma 3                                               | 81.12  | 2 | 41.63  | 2 |
| IPI:IPI00796776.2 | 555  | 58.8  | 5.97  | cDNA FLJ54081, highly similar to Keratin, type II cytoskeletal 5                                                                  | 19.03  | 2 | 43.44  | 6 |
| IPI:IPI00909194.1 | 507  | 56.4  | 9.45  | cDNA FLJ54257, highly similar to Leiomodin-1                                                                                      | 24.58  | 2 |        |   |
| IPI:IPI01015082.1 | 595  | 66.8  | 5.54  | cDNA FLJ54361                                                                                                                     | 19.29  | 2 |        |   |
| IPI:IPI01015645.1 | 641  | 73.5  | 7.68  | cDNA FLJ54747, highly similar to Active breakpoint cluster region-related protein                                                 | 12.59  | 2 |        |   |
| IPI:IPI00910539.1 | 122  | 13.3  | 9.61  | cDNA FLJ54899, highly similar to Complement factor B                                                                              | 30.42  | 2 |        |   |
| IPI:IPI00922401.1 | 931  | 107.3 | 7.52  | cDNA FLJ54956, highly similar to Vacuolar protein sorting 11                                                                      | 52.22  | 2 | 27.98  | 2 |
| IPI:IPI00922942.1 | 214  | 24.0  | 9.61  | cDNA FLJ55114                                                                                                                     | 181.88 | 2 |        |   |
| IPI:IPI00425935.3 | 218  | 25.4  | 9.28  | cDNA FLJ55270, highly similar to Solute carrier family 35 member B3                                                               | 22.11  | 2 |        |   |
| IPI:IPI01012440.1 | 536  | 60.7  | 5.69  | cDNA FLJ55432, highly similar to Probable ATP-dependent RNA helicase DDX58                                                        | 288.82 | 2 | 499.14 | 3 |
| IPI:IPI01011073.1 | 941  | 106.7 | 7.14  | cDNA FLJ55446, highly similar to Superkiller viralicidic activity 2-like 2                                                        | 49.28  | 2 |        |   |
| IPI:IPI01013671.1 | 407  | 46.0  | 6.38  | cDNA FLJ55555, highly similar to EH-domain-containing protein 2                                                                   | 43.71  | 2 |        |   |
| IPI:IPI00925157.1 | 758  | 86.3  | 6.25  | cDNA FLJ55680, highly similar to Dipeptidyl aminopeptidase-like protein 6                                                         | 39.01  | 2 | 77.12  | 2 |
| IPI:IPI00967429.2 | 453  | 51.4  | 5.14  | cDNA FLJ55802, highly similar to Protein RUFY3                                                                                    | 26.15  | 2 | 22.91  | 2 |
| IPI:IPI01013951.1 | 768  | 86.4  | 6.33  | cDNA FLJ56146, highly similar to Kinesin-like protein KIFC3                                                                       | 46.30  | 2 | 62.41  | 3 |
| IPI:IPI00935618.2 | 1237 | 133.3 | 5.40  | cDNA FLJ56270, highly similar to Homo sapiens pleckstrin homology domain containing, family G (with RhoGef domain) member 2, mRNA | 18.69  | 2 |        |   |
| IPI:IPI01012320.1 | 160  | 18.0  | 5.31  | cDNA FLJ56680, highly similar to Bifunctional apoptosis regulator                                                                 | 14.32  | 2 |        |   |
| IPI:IPI00909925.1 | 255  | 27.3  | 9.36  | cDNA FLJ56743, highly similar to RuvB-like 2                                                                                      | 19.36  | 2 |        |   |



|                   |      |       |      |                                                                                                                               |        |   |       |   |
|-------------------|------|-------|------|-------------------------------------------------------------------------------------------------------------------------------|--------|---|-------|---|
| IPI:IPI01009220.1 | 919  | 101.0 | 5.60 | cDNA FLJ57236, highly similar to Diacylglycerol kinase eta                                                                    | 10.70  | 2 |       |   |
| IPI:IPI00909132.1 | 609  | 67.6  | 7.87 | cDNA FLJ57660, highly similar to Homo sapiens zinc finger, CW type with PWWP domain 1 (ZCWPW1), mRNA                          | 35.07  | 2 |       |   |
| IPI:IPI00878460.2 | 718  | 78.7  | 9.50 | cDNA FLJ58080, highly similar to Positive cofactor 2glutamine/Q-rich-associated protein                                       | 28.74  | 2 |       |   |
| IPI:IPI01012850.1 | 693  | 79.0  | 8.43 | cDNA FLJ58265, highly similar to Ubiquitin-protein ligase BRE1B                                                               | 27.54  | 2 |       |   |
| IPI:IPI00910156.1 | 1253 | 139.2 | 6.57 | cDNA FLJ58355, highly similar to Tyrosine-protein phosphatase non-receptor type 23                                            | 39.63  | 2 | 55.49 | 3 |
| IPI:IPI00032267.3 | 802  | 92.2  | 7.06 | cDNA FLJ58396, highly similar to Ras GTPase-activating protein 3                                                              | 39.30  | 2 | 43.65 | 2 |
| IPI:IPI00295743.9 | 575  | 65.4  | 9.51 | cDNA FLJ58643, highly similar to Homo sapiens sel-1 suppressor of lin-12-like (SEL1L), mRNA                                   | 284.61 | 2 |       |   |
| IPI:IPI01012779.1 | 410  | 46.4  | 9.11 | cDNA FLJ59224, highly similar to Angiopoietin-4                                                                               | 29.96  | 2 | 31.85 | 2 |
| IPI:IPI00910608.1 | 1400 | 149.1 | 5.30 | cDNA FLJ59300, highly similar to Homo sapiens peroxisome proliferative activated receptor, gamma, coactivator-related 1, mRNA | 62.53  | 2 | 53.09 | 2 |
| IPI:IPI00798375.2 | 544  | 61.5  | 8.85 | cDNA FLJ59357, highly similar to Probable ATP-dependent RNA helicase DDX5                                                     | 10.88  | 2 | 18.48 | 2 |
| IPI:IPI01011952.1 | 927  | 100.9 | 5.48 | cDNA FLJ59659, highly similar to Vinculin                                                                                     | 29.99  | 2 |       |   |
| IPI:IPI00031461.2 | 449  | 51.1  | 8.18 | cDNA FLJ60299, highly similar to Rab GDP dissociation inhibitor beta                                                          | 45.08  | 2 |       |   |
| IPI:IPI00789324.3 | 563  | 62.6  | 5.17 | cDNA FLJ60424, highly similar to Junction plakoglobin                                                                         | 20.06  | 2 | 27.19 | 2 |
| IPI:IPI00910715.1 | 425  | 49.3  | 8.72 | cDNA FLJ60454, highly similar to Homo sapiens transmembrane channel-like 7 (TMC7), mRNA                                       | 46.48  | 2 | 49.99 | 3 |
| IPI:IPI00922581.1 | 270  | 31.5  | 9.41 | cDNA FLJ60562, highly similar to Bestrophin-1                                                                                 | 28.87  | 2 | 14.01 | 2 |
| IPI:IPI01015399.1 | 318  | 36.8  | 8.27 | cDNA FLJ60748, highly similar to Homo sapiens formin 2 (FMN2), mRNA                                                           | 10.66  | 2 | 13.27 | 2 |
| IPI:IPI00910325.1 | 193  | 22.0  | 5.82 | cDNA FLJ60846, highly similar to Arfaptin-1                                                                                   | 44.05  | 2 |       |   |
| IPI:IPI01011799.1 | 316  | 36.0  | 7.84 | cDNA FLJ61680, highly similar to GPI transamidase component FIG-T                                                             | 201.38 | 2 |       |   |
| IPI:IPI00737500.2 | 963  | 111.7 | 6.25 | cDNA: FLJ21683 fis, clone COL09335                                                                                            | 33.79  | 2 |       |   |

|                   |      |       |       |                                                              |        |   |        |   |
|-------------------|------|-------|-------|--------------------------------------------------------------|--------|---|--------|---|
| IPI:IPI00066543.2 | 823  | 93.6  | 6.10  | cGMP-specific 3',5'-cyclic phosphodiesterase isoform 3       | 23.59  | 2 |        |   |
| IPI:IPI00513814.1 | 188  | 20.9  | 5.44  | Chaperonin containing TCP1, subunit 3                        | 11.21  | 2 |        |   |
| IPI:IPI00915752.1 | 131  | 14.9  | 6.21  | Cingulin                                                     | 5.89   | 2 |        |   |
| IPI:IPI00641946.2 | 207  | 22.2  | 8.88  | claudin-10 isoform a_i1                                      | 16.84  | 2 |        |   |
| IPI:IPI00396063.6 | 1863 | 209.1 | 7.31  | C-myc promoter-binding protein                               | 57.29  | 2 | 43.41  | 2 |
| IPI:IPI00478809.4 | 2224 | 251.5 | 6.05  | Coagulation factor V                                         | 43.70  | 2 |        |   |
| IPI:IPI00017603.1 | 2351 | 266.8 | 7.36  | Coagulation factor VIII                                      | 117.13 | 2 | 64.85  | 4 |
| IPI:IPI00915422.1 | 423  | 47.2  | 5.59  | coatomer subunit delta isoform 2                             | 6.52   | 2 |        |   |
| IPI:IPI00930560.2 | 439  | 48.7  | 10.59 | coiled-coil domain containing 121-like                       | 21.54  | 2 |        |   |
| IPI:IPI00065428.4 | 514  | 61.8  | 8.90  | Coiled-coil domain-containing protein 11                     | 46.82  | 2 | 21.91  | 2 |
| IPI:IPI00174574.1 | 872  | 103.4 | 8.41  | Coiled-coil domain-containing protein 147                    | 34.55  | 2 | 31.91  | 2 |
| IPI:IPI00289837.4 | 553  | 59.9  | 8.79  | Coiled-coil domain-containing protein 85A                    | 16.20  | 2 |        |   |
| IPI:IPI00827891.3 | 114  | 12.8  | 7.11  | Cold agglutinin FS-2 H-chain (Fragment)                      | 90.14  | 2 |        |   |
| IPI:IPI00022394.2 | 245  | 25.8  | 8.41  | Complement C1q subcomponent subunit C                        | 19.34  | 2 | 21.36  | 2 |
| IPI:IPI00975619.1 | 107  | 12.0  | 10.20 | Conserved hypothetical protein                               | 50.86  | 2 | 40.61  | 2 |
| IPI:IPI00977541.1 | 81   | 9.3   | 9.04  | Conserved hypothetical protein                               | 10.15  | 2 |        |   |
| IPI:IPI00921105.1 | 108  | 12.0  | 8.73  | Conserved hypothetical protein                               | 16.49  | 2 |        |   |
| IPI:IPI00984543.1 | 191  | 22.3  | 9.14  | Conserved hypothetical protein                               | 20.31  | 2 |        |   |
| IPI:IPI00164005.1 | 770  | 86.3  | 5.47  | Conserved oligomeric Golgi complex subunit 7                 | 22.90  | 2 | 11.82  | 2 |
| IPI:IPI00103869.1 | 1663 | 180.9 | 7.93  | Cortactin-binding protein 2                                  | 38.26  | 2 |        |   |
| IPI:IPI00027839.1 | 196  | 21.4  | 9.96  | Corticoliberin                                               | 11.93  | 2 |        |   |
| IPI:IPI00219317.3 | 836  | 99.1  | 8.00  | Crooked neck pre-mRNA splicing factor-like 1                 | 52.28  | 2 | 32.51  | 2 |
| IPI:IPI00642151.1 | 706  | 82.3  | 6.73  | Cullin 2                                                     | 55.30  | 2 | 46.52  | 3 |
| IPI:IPI00216003.4 | 837  | 96.7  | 8.41  | Cullin-5                                                     | 64.36  | 2 |        |   |
| IPI:IPI00844265.1 | 431  | 48.8  | 7.74  | cytochrome P450 2C18 isoform 2                               | 59.39  | 2 | 106.37 | 3 |
| IPI:IPI00008485.1 | 889  | 98.3  | 6.68  | Cytoplasmic aconitate hydratase                              | 37.03  | 2 | 50.48  | 2 |
| IPI:IPI00790440.2 | 300  | 34.4  | 6.38  | cytosolic 5'-nucleotidase III-like protein                   | 46.27  | 2 |        |   |
| IPI:IPI00007111.1 | 281  | 31.6  | 9.00  | Dexamethasone-induced Ras-related protein 1                  | 70.26  | 2 |        |   |
| IPI:IPI00018953.1 | 766  | 88.2  | 6.04  | Dipeptidyl peptidase 4                                       | 21.70  | 2 | 23.86  | 3 |
| IPI:IPI00982606.1 | 1067 | 123.3 | 6.86  | disheveled-associated activator of morphogenesis 2 isoform 2 | 96.10  | 2 | 55.54  | 2 |
| IPI:IPI00293464.5 | 1140 | 126.9 | 5.26  | DNA damage-binding protein 1                                 | 62.65  | 2 | 58.16  | 2 |
| IPI:IPI00220317.3 | 1462 | 165.8 | 5.85  | DNA polymerase alpha catalytic subunit                       | 109.62 | 2 | 76.07  | 2 |
| IPI:IPI00979205.1 | 602  | 68.8  | 7.25  | DNA/RNA helicase, C-terminal domain containing protein       | 20.15  | 2 |        |   |
| IPI:IPI00786995.1 | 4096 | 465.2 | 7.23  | DNA-dependent protein kinase catalytic subunit-like          | 122.93 | 2 | 73.97  | 3 |
| IPI:IPI00010903.2 | 2369 | 266.4 | 6.40  | Dopey family member 1                                        | 59.40  | 2 | 73.05  | 3 |
| IPI:IPI00003774.1 | 350  | 40.2  | 6.60  | dTDP-D-glucose 4,6-dehydratase                               | 31.97  | 2 |        |   |
| IPI:IPI00181352.2 | 866  | 97.5  | 7.65  | dynamamin-2 isoform 4                                        | 32.14  | 2 | 25.37  | 2 |

|                   |      |       |       |                                                       |        |   |        |   |
|-------------------|------|-------|-------|-------------------------------------------------------|--------|---|--------|---|
| IPI:IPI00375149.4 | 924  | 107.5 | 7.99  | dynamin-like 120 kDa protein, mitochondrial isoform 2 | 50.38  | 2 | 27.96  | 2 |
| IPI:IPI01013608.1 | 504  | 57.3  | 8.57  | DYNC2H1 protein                                       | 37.93  | 2 | 49.20  | 3 |
| IPI:IPI00335711.6 | 4523 | 520.7 | 6.44  | Dynein heavy chain 11, axonemal                       | 124.11 | 2 | 50.69  | 2 |
| IPI:IPI00028911.2 | 895  | 97.4  | 8.56  | Dystroglycan                                          | 19.13  | 2 | 15.17  | 2 |
| IPI:IPI00375141.1 | 3562 | 412.1 | 5.83  | dystrophin Dp427l isoform                             | 118.52 | 2 | 124.74 | 4 |
| IPI:IPI00914985.1 | 123  | 13.3  | 5.45  | Epididymis luminal protein 180 (Fragment)             | 21.11  | 2 | 5.86   | 2 |
| IPI:IPI00429191.3 | 437  | 49.0  | 5.71  | Eukaryotic peptide chain release factor subunit 1     | 20.82  | 2 | 14.74  | 2 |
| IPI:IPI00004521.3 | 926  | 103.4 | 7.62  | Ewing's tumor-associated antigen 1                    | 65.92  | 2 | 30.96  | 2 |
| IPI:IPI00815844.1 | 61   | 7.0   | 12.02 | EXOSC10 protein (Fragment)                            | 8.59   | 2 |        |   |
| IPI:IPI00921455.4 | 2348 | 262.1 | 8.47  | FAM186A protein                                       | 44.54  | 2 | 38.03  | 4 |
| IPI:IPI00166145.3 | 418  | 45.9  | 8.82  | F-box/LRR-repeat protein 14                           | 26.85  | 2 |        |   |
| IPI:IPI00007775.1 | 434  | 49.1  | 6.48  | F-box/LRR-repeat protein 21                           | 10.65  | 2 |        |   |
| IPI:IPI00333405.5 | 1857 | 209.2 | 6.38  | Fer-1-like protein 6                                  | 58.79  | 2 | 33.07  | 2 |
| IPI:IPI00064201.5 | 1810 | 199.1 | 8.15  | FERM and PDZ domain-containing protein 3              | 20.76  | 2 |        |   |
| IPI:IPI00030293.5 | 625  | 68.6  | 6.70  | Glucokinase regulatory protein                        | 10.32  | 2 |        |   |
| IPI:IPI00297933.1 | 1484 | 166.3 | 6.93  | Glutamate [NMDA] receptor subunit epsilon-2           | 43.77  | 2 |        |   |
| IPI:IPI00016070.3 | 456  | 52.0  | 9.19  | Glycerol-3-phosphate acyltransferase 4                | 27.14  | 2 |        |   |
| IPI:IPI00015688.2 | 558  | 61.6  | 7.30  | Glypican-1                                            | 11.23  | 2 |        |   |
| IPI:IPI00944529.1 | 564  | 63.7  | 6.58  | glypican-3 isoform 3 precursor                        | 8.43   | 2 |        |   |
| IPI:IPI00975631.1 | 601  | 68.1  | 9.00  | Golgin subfamily A member 8-like protein 1-like       | 26.57  | 2 | 25.21  | 2 |
| IPI:IPI00017598.3 | 931  | 105.7 | 8.65  | GPI ethanolamine phosphate transferase 1              | 31.83  | 2 | 46.11  | 2 |
| IPI:IPI00878281.2 | 97   | 11.0  | 5.00  | GRB2-related adaptor protein 2                        | 21.57  | 2 |        |   |
| IPI:IPI00644786.3 | 796  | 90.8  | 5.11  | GRIP1 associated protein 1                            | 51.27  | 2 |        |   |
| IPI:IPI00647410.1 | 288  | 32.3  | 8.82  | Growth differentiation factor 10                      | 28.26  | 2 | 14.00  | 2 |
| IPI:IPI00827589.1 | 123  | 13.8  | 9.72  | Heavy chain variable region (Fragment)                | 43.09  | 2 | 25.55  | 2 |
| IPI:IPI00953627.1 | 567  | 64.1  | 7.36  | Hepatocyte growth factor-like protein homolog         | 19.50  | 2 | 7.63   | 2 |
| IPI:IPI00454601.1 | 156  | 17.1  | 7.94  | HERV-K_12q14.1 provirus ancestral Pro protein         | 12.20  | 2 |        |   |
| IPI:IPI00915786.2 | 106  | 12.9  | 10.17 | homeobox protein Hox-D8 isoform 3                     | 11.69  | 2 |        |   |
| IPI:IPI00019774.2 | 367  | 37.8  | 9.45  | Homeobox protein Nkx-6.1                              | 28.23  | 2 |        |   |
| IPI:IPI01010895.1 | 474  | 52.3  | 8.21  | HS24/P52                                              | 100.67 | 2 |        |   |
| IPI:IPI00219717.1 | 509  | 57.8  | 7.01  | Hyaluronidase PH-20                                   | 145.29 | 2 |        |   |
| IPI:IPI00980073.1 | 366  | 39.7  | 7.61  | hypothetical protein LOC100507089                     | 15.93  | 2 |        |   |
| IPI:IPI00978401.1 | 115  | 13.8  | 4.37  | hypothetical protein LOC100508808, partial            | 12.58  | 2 |        |   |
| IPI:IPI00976150.1 | 128  | 15.2  | 4.50  | hypothetical protein LOC100508863                     | 15.87  | 2 |        |   |
| IPI:IPI00943902.2 | 360  | 39.0  | 7.14  | hypothetical protein LOC401847                        | 27.80  | 2 | 27.27  | 2 |
| IPI:IPI00739533.2 | 456  | 49.4  | 8.59  | hypothetical protein LOC440292                        | 23.31  | 2 | 16.75  | 2 |
| IPI:IPI00455258.6 | 344  | 37.6  | 8.56  | hypothetical protein LOC440292                        | 19.00  | 2 |        |   |

|                   |      |       |      |                                                                  |        |   |        |   |
|-------------------|------|-------|------|------------------------------------------------------------------|--------|---|--------|---|
| IPI:IPI00954120.1 | 216  | 23.5  | 4.37 | hypothetical protein LOC79886 isoform 2                          | 6.89   | 2 |        |   |
| IPI:IPI00386142.1 | 146  | 16.2  | 8.28 | Ig heavy chain V-II region ARH-77                                | 77.00  | 2 |        |   |
| IPI:IPI00382500.1 | 116  | 12.7  | 8.48 | Ig heavy chain V-III region GAL                                  | 30.65  | 2 | 36.55  | 4 |
| IPI:IPI00382488.1 | 121  | 13.6  | 9.36 | Ig heavy chain V-III region HIL                                  | 55.65  | 2 |        |   |
| IPI:IPI00382486.1 | 119  | 13.2  | 9.72 | Ig heavy chain V-III region NIE                                  | 36.99  | 2 | 17.56  | 2 |
| IPI:IPI00382497.1 | 116  | 12.4  | 9.73 | Ig heavy chain V-III region TUR                                  | 154.08 | 2 | 62.46  | 2 |
| IPI:IPI00382476.1 | 114  | 12.2  | 8.50 | Ig heavy chain V-III region WEA                                  | 118.21 | 2 | 65.62  | 2 |
| IPI:IPI00387022.3 | 108  | 12.0  | 5.99 | Ig kappa chain V-I region AG                                     | 115.83 | 2 | 51.45  | 2 |
| IPI:IPI00387026.1 | 108  | 11.8  | 8.44 | Ig kappa chain V-I region EU                                     | 44.77  | 2 | 17.97  | 2 |
| IPI:IPI00387027.1 | 108  | 11.8  | 8.88 | Ig kappa chain V-I region Gal                                    | 111.94 | 2 |        |   |
| IPI:IPI00387095.1 | 108  | 11.9  | 8.85 | Ig kappa chain V-I region Ka                                     | 5.20   | 2 |        |   |
| IPI:IPI00387105.1 | 109  | 11.9  | 6.57 | Ig kappa chain V-I region Mev                                    | 42.97  | 2 |        |   |
| IPI:IPI00387106.1 | 112  | 12.2  | 5.36 | Ig kappa chain V-I region Ni                                     | 26.35  | 2 | 5.57   | 2 |
| IPI:IPI00387098.1 | 108  | 11.8  | 9.91 | Ig kappa chain V-I region OU                                     | 88.11  | 2 |        |   |
| IPI:IPI00387099.1 | 108  | 11.9  | 6.51 | Ig kappa chain V-I region Rei                                    | 114.64 | 2 |        |   |
| IPI:IPI00387101.1 | 108  | 11.8  | 6.00 | Ig kappa chain V-I region Scw                                    | 117.42 | 2 | 56.16  | 2 |
| IPI:IPI00387110.1 | 112  | 12.0  | 9.29 | Ig kappa chain V-II region MIL                                   | 12.46  | 2 | 15.40  | 2 |
| IPI:IPI00854644.3 | 116  | 12.5  | 4.59 | Ig kappa chain V-III region Ti                                   | 95.52  | 2 | 47.09  | 2 |
| IPI:IPI00829834.2 | 116  | 12.7  | 5.94 | Ig kappa chain V-III region VH (Fragment)                        | 26.17  | 2 | 17.81  | 2 |
| IPI:IPI00385985.1 | 111  | 11.9  | 5.08 | Ig lambda chain V-III region LOI                                 | 40.54  | 2 | 26.10  | 3 |
| IPI:IPI00382436.1 | 108  | 11.4  | 6.52 | Ig lambda chain V-III region SH                                  | 34.70  | 2 |        |   |
| IPI:IPI00783471.1 | 129  | 14.5  | 8.78 | Immunoglobulin heavy chain variable region (Fragment)            | 71.90  | 2 | 33.53  | 2 |
| IPI:IPI00966130.1 | 1326 | 147.9 | 8.12 | immunoglobulin superfamily member 22                             | 39.68  | 2 | 30.44  | 2 |
| IPI:IPI00398229.1 | 530  | 59.7  | 7.91 | Inactive ubiquitin carboxyl-terminal hydrolase 17-like protein 7 | 9.30   | 2 |        |   |
| IPI:IPI00291510.3 | 514  | 55.8  | 6.90 | Inosine-5'-monophosphate dehydrogenase 2                         | 15.70  | 2 | 10.30  | 2 |
| IPI:IPI00007205.2 | 1196 | 131.8 | 5.87 | Integrin alpha-E precursor                                       | 24.46  | 2 |        |   |
| IPI:IPI00007641.2 | 460  | 51.5  | 5.41 | Interleukin-1 receptor-associated kinase 4                       | 31.95  | 2 |        |   |
| IPI:IPI00247110.7 | 917  | 106.4 | 6.67 | Isoform 1 of Ankyrin repeat domain-containing protein 62         | 137.61 | 2 | 103.00 | 4 |
| IPI:IPI00295640.3 | 1617 | 184.2 | 7.36 | Isoform 1 of ATP-binding cassette sub-family A member 6          | 27.29  | 2 |        |   |
| IPI:IPI00439184.5 | 177  | 20.2  | 9.07 | Isoform 1 of Centromere protein R                                | 16.39  | 2 |        |   |
| IPI:IPI00794880.1 | 2997 | 335.7 | 6.34 | Isoform 1 of Chromodomain-helicase-DNA-binding protein 7         | 94.49  | 2 | 71.21  | 2 |
| IPI:IPI00913869.3 | 1154 | 134.0 | 4.65 | Isoform 1 of Coiled-coil domain-containing protein 136           | 105.59 | 2 |        |   |
| IPI:IPI00783185.3 | 1101 | 128.7 | 7.02 | Isoform 1 of Coiled-coil domain-containing protein 150           | 31.16  | 2 | 65.49  | 4 |
| IPI:IPI00260630.7 | 950  | 108.1 | 9.72 | Isoform 1 of Coiled-coil domain-containing protein 80            | 29.35  | 2 | 28.87  | 3 |
| IPI:IPI00856012.1 | 2263 | 247.0 | 6.89 | Isoform 1 of Collagen alpha-6(VI) chain                          | 77.44  | 2 |        |   |

|                   |      |       |      |                                                                                  |        |   |        |   |
|-------------------|------|-------|------|----------------------------------------------------------------------------------|--------|---|--------|---|
| IPI:IPI00743825.1 | 443  | 51.6  | 5.53 | Isoform 1 of COP9 signalosome complex subunit 2                                  | 23.94  | 2 |        |   |
| IPI:IPI00940945.2 | 849  | 95.0  | 5.44 | Isoform 1 of Cytosolic phospholipase A2 zeta                                     | 190.15 | 2 | 173.27 | 2 |
| IPI:IPI00746684.4 | 1870 | 215.2 | 7.96 | Isoform 1 of Dedicator of cytokinesis protein 5                                  | 66.02  | 2 |        |   |
| IPI:IPI00902667.1 | 811  | 92.9  | 8.68 | Isoform 1 of DEP domain-containing protein 1A                                    | 69.07  | 2 | 105.16 | 2 |
| IPI:IPI00021941.1 | 977  | 108.8 | 7.08 | Isoform 1 of Disks large-associated protein 1                                    | 51.71  | 2 | 20.48  | 2 |
| IPI:IPI00015287.1 | 481  | 52.4  | 6.47 | Isoform 1 of Docking protein 1                                                   | 18.84  | 2 |        |   |
| IPI:IPI00152462.1 | 4116 | 470.5 | 6.43 | Isoform 1 of Dynein heavy chain 3, axonemal                                      | 95.26  | 2 | 81.23  | 4 |
| IPI:IPI00217405.1 | 1749 | 200.1 | 6.01 | Isoform 1 of E3 ubiquitin-protein ligase UBR1                                    | 56.23  | 2 | 28.51  | 2 |
| IPI:IPI00166663.4 | 309  | 34.1  | 8.46 | Isoform 1 of Epidermal retinol dehydrogenase 2                                   | 19.44  | 2 |        |   |
| IPI:IPI00852806.1 | 811  | 94.1  | 6.46 | Isoform 1 of Exocyst complex component 6B                                        | 24.18  | 2 | 26.59  | 3 |
| IPI:IPI00004047.1 | 718  | 82.2  | 6.55 | Isoform 1 of Exostosin-2                                                         | 25.99  | 2 | 19.42  | 2 |
| IPI:IPI00018019.1 | 528  | 58.9  | 9.09 | Isoform 1 of G patch domain-containing protein 2                                 | 33.23  | 2 | 44.40  | 2 |
| IPI:IPI00030267.3 | 1663 | 180.7 | 6.73 | Isoform 1 of Glutamine-rich protein 2                                            | 205.68 | 2 | 206.25 | 2 |
| IPI:IPI00027424.3 | 524  | 57.5  | 6.32 | Isoform 1 of Glycerol kinase                                                     | 68.02  | 2 | 28.97  | 2 |
| IPI:IPI00016576.3 | 625  | 71.1  | 6.44 | Isoform 1 of Grainyhead-like protein 2 homolog                                   | 66.90  | 2 | 89.31  | 2 |
| IPI:IPI00885180.1 | 1923 | 214.2 | 6.62 | Isoform 1 of GREB1-like protein                                                  | 35.79  | 2 |        |   |
| IPI:IPI00328884.7 | 382  | 42.6  | 6.47 | Isoform 1 of Guanine nucleotide exchange factor for Rab-3A                       | 23.90  | 2 |        |   |
| IPI:IPI00107339.4 | 327  | 35.6  | 7.97 | Isoform 1 of Guanine nucleotide-binding protein subunit beta-like protein 1      | 40.36  | 2 |        |   |
| IPI:IPI00797136.2 | 350  | 39.3  | 9.17 | Isoform 1 of Inhibitor of nuclear factor kappa-B kinase-interacting protein      | 22.19  | 2 |        |   |
| IPI:IPI00028484.1 | 260  | 28.0  | 7.58 | Isoform 1 of Kallikrein-8                                                        | 13.20  | 2 |        |   |
| IPI:IPI00295437.4 | 1761 | 193.4 | 6.35 | Isoform 1 of Laminin subunit beta-4                                              | 36.50  | 2 |        |   |
| IPI:IPI00297362.5 | 343  | 39.7  | 4.65 | Isoform 1 of Leucine-rich repeat-containing protein 23                           | 34.76  | 2 |        |   |
| IPI:IPI00456631.5 | 852  | 92.8  | 6.52 | Isoform 1 of Lysine-specific histone demethylase 1A                              | 26.82  | 2 |        |   |
| IPI:IPI00719714.3 | 306  | 34.5  | 5.97 | Isoform 1 of LysM and putative peptidoglycan-binding domain-containing protein 3 | 19.06  | 2 |        |   |
| IPI:IPI00796450.2 | 3801 | 428.9 | 6.61 | Isoform 1 of Lysosomal-trafficking regulator                                     | 82.37  | 2 | 111.89 | 2 |
| IPI:IPI00296938.1 | 664  | 76.1  | 9.07 | Isoform 1 of Macoilin                                                            | 30.83  | 2 |        |   |
| IPI:IPI00939150.1 | 2116 | 241.4 | 8.57 | Isoform 1 of Myosin-VIIIb                                                        | 92.32  | 2 | 59.87  | 2 |
| IPI:IPI00395569.5 | 2604 | 296.9 | 6.39 | Isoform 1 of Neurobeachin-like protein 1                                         | 38.88  | 2 | 34.28  | 2 |
| IPI:IPI00007729.1 | 257  | 29.4  | 9.67 | Isoform 1 of Nucleolar protein 7                                                 | 28.20  | 2 | 14.38  | 2 |
| IPI:IPI00830041.2 | 579  | 65.0  | 8.79 | Isoform 1 of PARP1-binding protein                                               | 71.43  | 2 | 37.43  | 2 |
| IPI:IPI00789041.2 | 717  | 81.6  | 7.14 | Isoform 1 of Pinin                                                               | 22.45  | 2 |        |   |

|                   |      |       |      |                                                                                         |        |   |       |   |
|-------------------|------|-------|------|-----------------------------------------------------------------------------------------|--------|---|-------|---|
| IPI:IPI00167911.2 | 520  | 60.1  | 8.57 | Isoform 1 of Poly(A)-specific ribonuclease PARN-like domain-containing protein 1        | 94.66  | 2 |       |   |
| IPI:IPI00479743.3 | 1075 | 121.3 | 6.20 | Isoform 1 of POTE ankyrin domain family member E                                        | 27.97  | 2 | 23.81 | 3 |
| IPI:IPI00220302.1 | 396  | 44.2  | 5.19 | Isoform 1 of Pre-mRNA-splicing regulator WTAP                                           | 23.16  | 2 |       |   |
| IPI:IPI00642544.2 | 327  | 35.2  | 7.96 | Isoform 1 of Probable 4-hydroxy-2-oxoglutarate aldolase, mitochondrial                  | 25.06  | 2 |       |   |
| IPI:IPI00642126.6 | 1550 | 174.8 | 5.94 | Isoform 1 of Protein ALO17                                                              | 35.00  | 2 |       |   |
| IPI:IPI00645643.2 | 974  | 104.8 | 8.54 | Isoform 1 of Protein bicaudal C homolog 1                                               | 41.22  | 2 |       |   |
| IPI:IPI00747250.6 | 849  | 98.1  | 6.13 | Isoform 1 of Protein diaphanous homolog 3                                               | 28.37  | 2 | 23.90 | 2 |
| IPI:IPI00954159.1 | 2266 | 252.3 | 6.60 | Isoform 1 of Protein ELYS                                                               | 64.56  | 2 |       |   |
| IPI:IPI00376689.1 | 1361 | 152.9 | 7.85 | Isoform 1 of Protein KIAA1199                                                           | 26.71  | 2 | 20.34 | 2 |
| IPI:IPI00177937.6 | 2002 | 224.2 | 5.55 | Isoform 1 of Protein MICAL-3                                                            | 25.17  | 2 | 15.44 | 2 |
| IPI:IPI00940441.1 | 1090 | 123.2 | 6.65 | Isoform 1 of Protein unc-13 homolog D                                                   | 38.13  | 2 | 32.34 | 2 |
| IPI:IPI00847572.1 | 518  | 56.9  | 6.47 | Isoform 1 of Receptor-interacting serine/threonine-protein kinase 3                     | 23.07  | 2 |       |   |
| IPI:IPI00853256.1 | 1194 | 133.1 | 8.57 | Isoform 1 of Rho GTPase-activating protein SYDE2                                        | 29.58  | 2 | 30.82 | 2 |
| IPI:IPI00014256.2 | 776  | 87.4  | 6.05 | Isoform 1 of Rho guanine nucleotide exchange factor 6                                   | 71.38  | 2 | 36.22 | 3 |
| IPI:IPI00744637.2 | 708  | 79.8  | 5.74 | Isoform 1 of RUN and FYVE domain-containing protein 1                                   | 45.06  | 2 |       |   |
| IPI:IPI00171087.7 | 995  | 111.7 | 8.72 | Isoform 1 of S1 RNA-binding domain-containing protein 1                                 | 33.33  | 2 | 26.05 | 3 |
| IPI:IPI00761054.2 | 993  | 107.5 | 6.30 | Isoform 1 of Serine/threonine-protein phosphatase 6 regulatory ankyrin repeat subunit B | 19.79  | 2 |       |   |
| IPI:IPI00159049.3 | 1596 | 174.9 | 9.74 | Isoform 1 of SET-binding protein                                                        | 60.19  | 2 | 35.97 | 2 |
| IPI:IPI00162549.5 | 689  | 78.3  | 8.87 | Isoform 1 of Sp110 nuclear body protein                                                 | 17.03  | 2 |       |   |
| IPI:IPI00658151.5 | 3223 | 348.7 | 8.35 | Isoform 1 of Striated muscle preferentially expressed protein kinase                    | 52.78  | 2 |       |   |
| IPI:IPI00293093.5 | 395  | 45.4  | 6.71 | Isoform 1 of THAP domain-containing protein 5                                           | 33.09  | 2 |       |   |
| IPI:IPI00301631.5 | 397  | 46.2  | 6.01 | Isoform 1 of Torsin-3A                                                                  | 192.00 | 2 |       |   |
| IPI:IPI00784161.1 | 1726 | 198.9 | 4.91 | Isoform 1 of Transcription elongation factor SPT6                                       | 62.03  | 2 | 60.47 | 2 |
| IPI:IPI00423562.1 | 1406 | 158.6 | 7.71 | Isoform 1 of Ubiquitin carboxyl-terminal hydrolase 6                                    | 24.05  | 2 | 22.07 | 2 |
| IPI:IPI00827994.2 | 534  | 62.6  | 8.79 | Isoform 1 of Uncharacterized coiled-coil domain-containing protein KIAA1984             | 22.92  | 2 | 46.71 | 5 |
| IPI:IPI00607659.2 | 987  | 115.7 | 6.23 | Isoform 1 of Uncharacterized protein C14orf145                                          | 24.02  | 2 | 20.28 | 2 |
| IPI:IPI00174978.4 | 400  | 46.1  | 9.69 | Isoform 1 of Uncharacterized protein C1orf141                                           | 49.85  | 2 | 40.20 | 4 |
| IPI:IPI00465142.2 | 1000 | 110.4 | 5.69 | Isoform 1 of Uncharacterized protein KIAA0528                                           | 20.12  | 2 | 22.94 | 2 |

|                   |      |       |      |                                                                          |        |   |        |   |
|-------------------|------|-------|------|--------------------------------------------------------------------------|--------|---|--------|---|
| IPI:IPI00170692.4 | 249  | 27.9  | 8.62 | Isoform 1 of Vesicle-associated membrane protein-associated protein A    | 14.74  | 2 |        |   |
| IPI:IPI00432723.3 | 865  | 96.7  | 8.22 | Isoform 1 of Xylosyltransferase 2                                        | 31.89  | 2 | 21.43  | 2 |
| IPI:IPI00329547.3 | 1668 | 196.5 | 9.42 | Isoform 1 of Zinc finger CCCH domain-containing protein 13               | 39.73  | 2 | 46.23  | 3 |
| IPI:IPI00941659.1 | 3567 | 393.5 | 6.37 | Isoform 1 of Zinc finger homeobox protein 4                              | 69.98  | 2 | 64.60  | 3 |
| IPI:IPI00001180.6 | 811  | 87.4  | 6.54 | Isoform 1 of Zinc finger protein 839                                     | 60.43  | 2 | 60.93  | 2 |
| IPI:IPI00385631.7 | 2961 | 330.9 | 5.95 | Isoform 1 of Zinc finger ZZ-type and EF-hand domain-containing protein 1 | 105.65 | 2 |        |   |
| IPI:IPI00915417.1 | 1954 | 222.2 | 5.63 | Isoform 15 of Dysferlin                                                  | 44.43  | 2 | 52.74  | 2 |
| IPI:IPI00788157.1 | 874  | 99.9  | 8.02 | Isoform 2 of 5'-3' exoribonuclease 2                                     | 55.71  | 2 | 35.44  | 2 |
| IPI:IPI00843833.1 | 890  | 100.3 | 7.17 | Isoform 2 of Acyl-CoA dehydrogenase family member 10                     | 17.41  | 2 | 6.36   | 2 |
| IPI:IPI00641214.3 | 1518 | 176.5 | 7.59 | Isoform 2 of Adenylate cyclase type 10                                   | 106.03 | 2 | 49.83  | 2 |
| IPI:IPI00221389.2 | 1272 | 140.4 | 8.21 | Isoform 2 of AF4/FMR2 family member 2                                    | 50.64  | 2 |        |   |
| IPI:IPI00740123.2 | 4120 | 454.8 | 6.20 | Isoform 2 of Alstrom syndrome protein 1                                  | 74.88  | 2 | 70.57  | 4 |
| IPI:IPI00448466.3 | 2039 | 232.9 | 7.06 | Isoform 2 of Ankyrin repeat domain-containing protein 12                 | 41.78  | 2 |        |   |
| IPI:IPI00759583.1 | 336  | 36.5  | 9.26 | Isoform 2 of Apoptosis-inducing factor 2                                 | 119.67 | 2 | 101.71 | 3 |
| IPI:IPI00412742.1 | 458  | 51.3  | 5.88 | Isoform 2 of Calcium-binding mitochondrial carrier protein SCaMC-1       | 31.65  | 2 |        |   |
| IPI:IPI00292871.1 | 2386 | 274.2 | 5.03 | Isoform 2 of Centrosome-associated protein CEP250                        | 168.40 | 2 | 80.97  | 2 |
| IPI:IPI00641481.2 | 433  | 47.8  | 6.01 | Isoform 2 of Cholesteryl ester transfer protein                          | 15.02  | 2 |        |   |
| IPI:IPI00954192.1 | 1709 | 196.5 | 7.14 | Isoform 2 of Chromodomain-helicase-DNA-binding protein 1                 | 15.20  | 2 |        |   |
| IPI:IPI00295494.3 | 755  | 88.2  | 6.38 | Isoform 2 of Coiled-coil domain-containing protein 39                    | 15.81  | 2 | 12.35  | 2 |
| IPI:IPI00892863.1 | 2526 | 279.8 | 7.36 | Isoform 2 of Collagen alpha-5(VI) chain                                  | 78.03  | 2 |        |   |
| IPI:IPI00216641.1 | 1007 | 111.8 | 5.77 | Isoform 2 of Contactin-1                                                 | 36.32  | 2 | 23.14  | 2 |
| IPI:IPI00807412.1 | 336  | 37.9  | 7.12 | Isoform 2 of Cytosolic 5'-nucleotidase 3                                 | 22.57  | 2 |        |   |
| IPI:IPI00827974.1 | 1216 | 135.8 | 5.17 | Isoform 2 of E3 ubiquitin-protein ligase HECW2                           | 20.89  | 2 |        |   |
| IPI:IPI00171230.6 | 992  | 113.9 | 6.33 | Isoform 2 of ELKS/Rab6-interacting/CAST family member 1                  | 60.28  | 2 | 20.45  | 2 |
| IPI:IPI00550518.1 | 810  | 88.0  | 7.42 | Isoform 2 of Eukaryotic translation initiation factor 4E transporter     | 61.14  | 2 | 50.96  | 3 |
| IPI:IPI00556476.2 | 803  | 89.2  | 8.43 | Isoform 2 of Exonuclease 1                                               | 52.36  | 2 | 41.71  | 2 |
| IPI:IPI00855962.1 | 1209 | 132.4 | 5.17 | Isoform 2 of FK506-binding protein 15                                    | 124.72 | 2 |        |   |

|                   |      |       |       |                                                                          |        |   |       |   |
|-------------------|------|-------|-------|--------------------------------------------------------------------------|--------|---|-------|---|
| IPI:IPI00640805.3 | 2667 | 295.7 | 4.92  | Isoform 2 of FRAS1-related extracellular matrix protein 2                | 31.50  | 2 | 29.68 | 2 |
| IPI:IPI00471914.6 | 1374 | 154.4 | 7.23  | Isoform 2 of FYVE, RhoGEF and PH domain-containing protein 6             | 28.80  | 2 | 30.60 | 2 |
| IPI:IPI00218910.1 | 536  | 60.8  | 8.59  | Isoform 2 of Growth factor receptor-bound protein 10                     | 12.90  | 2 |       |   |
| IPI:IPI00797232.3 | 1697 | 195.9 | 6.23  | Isoform 2 of Leucine-rich repeat and IQ domain-containing protein 1      | 113.37 | 2 | 58.53 | 2 |
| IPI:IPI00873593.1 | 1326 | 147.0 | 7.78  | Isoform 2 of Leucine-rich repeat-containing protein 16A                  | 51.09  | 2 | 53.59 | 2 |
| IPI:IPI00216484.6 | 665  | 75.5  | 5.55  | Isoform 2 of LisH domain-containing protein ARMC9                        | 36.87  | 2 | 22.87 | 2 |
| IPI:IPI00738581.2 | 809  | 91.9  | 6.80  | Isoform 2 of Lysine-specific demethylase 7                               | 15.82  | 2 | 16.08 | 2 |
| IPI:IPI00604495.3 | 641  | 73.4  | 6.29  | Isoform 2 of MAGUK p55 subfamily member 5                                | 27.55  | 2 |       |   |
| IPI:IPI00439195.1 | 259  | 29.0  | 5.21  | Isoform 2 of Methyl-CpG-binding domain protein 3                         | 14.81  | 2 |       |   |
| IPI:IPI00216268.1 | 2019 | 229.7 | 6.18  | Isoform 2 of Myoferlin                                                   | 50.96  | 2 | 36.12 | 2 |
| IPI:IPI00384038.3 | 367  | 40.6  | 5.60  | Isoform 2 of Nuclear distribution protein nudeE-like 1                   | 11.94  | 2 |       |   |
| IPI:IPI00060650.3 | 130  | 13.5  | 8.29  | Isoform 2 of PEST proteolytic signal-containing nuclear protein          | 82.13  | 2 |       |   |
| IPI:IPI00941211.1 | 663  | 75.5  | 7.71  | Isoform 2 of PHD finger protein 14                                       | 16.02  | 2 |       |   |
| IPI:IPI00237913.3 | 1310 | 147.9 | 7.75  | Isoform 2 of Probable phospholipid-transporting ATPase IK                | 52.27  | 2 |       |   |
| IPI:IPI00003964.4 | 2554 | 290.3 | 5.80  | Isoform 2 of Probable ubiquitin carboxyl-terminal hydrolase FAF-X        | 51.08  | 2 | 20.59 | 3 |
| IPI:IPI00747846.1 | 195  | 21.8  | 8.56  | Isoform 2 of Protein EAN57                                               | 20.64  | 2 |       |   |
| IPI:IPI00607859.1 | 1224 | 135.9 | 6.51  | Isoform 2 of Protein FAM193A                                             | 27.53  | 2 | 19.92 | 2 |
| IPI:IPI00953673.1 | 349  | 39.8  | 6.80  | Isoform 2 of Protein FAM45A                                              | 22.79  | 2 | 15.84 | 2 |
| IPI:IPI00787580.1 | 584  | 66.5  | 8.56  | Isoform 2 of Putative RNA polymerase II subunit B1 CTD phosphatase RPAP2 | 11.05  | 2 |       |   |
| IPI:IPI00465186.3 | 1898 | 211.6 | 6.42  | Isoform 2 of Receptor-type tyrosine-protein phosphatase F                | 76.19  | 2 | 55.37 | 2 |
| IPI:IPI00760919.1 | 1424 | 152.5 | 7.33  | Isoform 2 of Regulation of nuclear pre-mRNA domain-containing protein 2  | 29.97  | 2 | 35.98 | 2 |
| IPI:IPI00478558.3 | 1165 | 130.2 | 7.94  | Isoform 2 of Rho GTPase-activating protein 20                            | 51.37  | 2 | 38.14 | 3 |
| IPI:IPI00216360.1 | 759  | 86.1  | 6.67  | Isoform 2 of Rho GTPase-activating protein 26                            | 71.97  | 2 | 57.71 | 3 |
| IPI:IPI00013988.2 | 1501 | 172.2 | 6.62  | Isoform 2 of Rho GTPase-activating protein 5                             | 31.20  | 2 | 36.79 | 2 |
| IPI:IPI00409629.5 | 505  | 57.6  | 7.23  | Isoform 2 of RING finger protein 31                                      | 45.41  | 2 | 27.57 | 2 |
| IPI:IPI00513877.2 | 250  | 28.4  | 10.51 | Isoform 2 of RNA exonuclease 4                                           | 34.88  | 2 | 48.30 | 2 |
| IPI:IPI00465048.8 | 606  | 70.0  | 5.83  | Isoform 2 of RUN and FYVE domain-containing protein 2                    | 48.14  | 2 |       |   |
| IPI:IPI00895947.1 | 1227 | 129.5 | 6.99  | Isoform 2 of Sal-like protein 1                                          | 49.17  | 2 |       |   |



|                   |      |       |      |                                                                       |        |   |       |   |
|-------------------|------|-------|------|-----------------------------------------------------------------------|--------|---|-------|---|
| IPI:IPI00455330.4 | 896  | 102.2 | 8.31 | Isoform 2 of Schlafen family member 14                                | 21.98  | 2 | 26.01 | 3 |
| IPI:IPI00647904.1 | 384  | 44.9  | 8.41 | Isoform 2 of Serine/threonine-protein kinase Nek2                     | 17.10  | 2 | 19.93 | 2 |
| IPI:IPI00398442.3 | 663  | 73.3  | 6.81 | Isoform 2 of Serine/threonine-protein kinase WNK4                     | 40.66  | 2 | 18.94 | 2 |
| IPI:IPI00890827.1 | 283  | 32.5  | 6.04 | Isoform 2 of Serine/threonine-protein phosphatase 6 catalytic subunit | 10.41  | 2 |       |   |
| IPI:IPI00220666.3 | 2005 | 227.8 | 5.77 | Isoform 2 of Sodium channel protein type 2 subunit alpha              | 119.79 | 2 | 21.75 | 2 |
| IPI:IPI00855755.1 | 406  | 46.8  | 8.75 | Isoform 2 of Sterile alpha motif domain-containing protein 9-like     | 19.17  | 2 | 42.41 | 2 |
| IPI:IPI00549199.2 | 2711 | 298.2 | 5.63 | Isoform 2 of Thyroglobulin                                            | 50.18  | 2 | 33.07 | 2 |
| IPI:IPI00160265.1 | 1709 | 181.9 | 6.58 | Isoform 2 of Trinucleotide repeat-containing gene 6A protein          | 70.90  | 2 | 82.22 | 2 |
| IPI:IPI00004420.8 | 1214 | 134.3 | 6.93 | Isoform 2 of Tripartite motif-containing protein 66                   | 19.76  | 2 |       |   |
| IPI:IPI00645605.3 | 473  | 52.0  | 9.17 | Isoform 2 of tRNA-specific adenosine deaminase 1                      | 19.57  | 2 |       |   |
| IPI:IPI00745978.3 | 1233 | 139.9 | 5.62 | Isoform 2 of Uncharacterized protein C3orf63                          | 70.37  | 2 |       |   |
| IPI:IPI00847343.1 | 425  | 49.8  | 9.07 | Isoform 2 of Uncharacterized protein C9orf117                         | 33.05  | 2 |       |   |
| IPI:IPI00853247.3 | 383  | 43.9  | 7.81 | Isoform 2 of Uncharacterized protein KIAA0748                         | 14.93  | 2 |       |   |
| IPI:IPI00871233.1 | 439  | 48.5  | 6.07 | Isoform 2 of UPF0667 protein C1orf55                                  | 24.66  | 2 | 28.05 | 2 |
| IPI:IPI00215851.2 | 842  | 94.4  | 7.20 | Isoform 2 of Villin-like protein                                      | 63.79  | 2 | 56.49 | 2 |
| IPI:IPI00152251.5 | 623  | 70.9  | 5.96 | Isoform 2 of Zinc finger protein 496                                  | 21.70  | 2 |       |   |
| IPI:IPI00479590.1 | 1232 | 138.9 | 7.81 | Isoform 2 of Zinc finger protein 644                                  | 73.52  | 2 |       |   |
| IPI:IPI00470445.1 | 316  | 36.1  | 7.15 | Isoform 2 of Zona pellucida-binding protein 2                         | 166.15 | 2 |       |   |
| IPI:IPI00879043.1 | 841  | 94.2  | 7.50 | Isoform 3 of Acyl-CoA synthetase family member 4                      | 16.12  | 2 |       |   |
| IPI:IPI00288939.5 | 925  | 107.1 | 6.70 | Isoform 3 of Coiled-coil domain-containing protein 40                 | 37.80  | 2 |       |   |
| IPI:IPI00910891.2 | 1273 | 141.4 | 9.42 | Isoform 3 of Cyclin-dependent kinase 12                               | 24.03  | 2 | 41.80 | 2 |
| IPI:IPI00167753.1 | 603  | 67.2  | 5.39 | Isoform 3 of DIS3-like exonuclease 2                                  | 19.19  | 2 |       |   |
| IPI:IPI00477352.5 | 405  | 45.0  | 9.42 | Isoform 3 of E3 SUMO-protein ligase PIAS2                             | 10.54  | 2 |       |   |
| IPI:IPI00394857.2 | 1379 | 159.0 | 6.04 | Isoform 3 of EF-hand calcium-binding domain-containing protein 5      | 34.28  | 2 |       |   |
| IPI:IPI00022004.2 | 429  | 49.9  | 6.33 | Isoform 3 of Engulfment and cell motility protein 1                   | 21.84  | 2 |       |   |
| IPI:IPI00027801.4 | 999  | 113.9 | 9.38 | Isoform 3 of F-box/WD repeat-containing protein 10                    | 69.99  | 2 | 39.84 | 2 |
| IPI:IPI00550342.2 | 3072 | 327.6 | 5.76 | Isoform 3 of Helicase SRCAP                                           | 39.56  | 2 |       |   |
| IPI:IPI00419894.1 | 1516 | 165.6 | 5.86 | Isoform 3 of Homeobox protein cut-like 1                              | 33.78  | 2 | 37.34 | 2 |

|                   |      |       |      |                                                                           |        |   |        |   |
|-------------------|------|-------|------|---------------------------------------------------------------------------|--------|---|--------|---|
| IPI:IPI00164861.3 | 1749 | 195.9 | 5.69 | Isoform 3 of Kinesin-like protein KIF13A                                  | 53.56  | 2 | 47.10  | 2 |
| IPI:IPI00004068.3 | 2176 | 242.8 | 7.05 | Isoform 3 of Mediator of RNA polymerase II transcription subunit 12       | 58.34  | 2 | 36.27  | 2 |
| IPI:IPI00655820.1 | 449  | 50.4  | 9.50 | Isoform 3 of Microspherule protein 1                                      | 39.11  | 2 |        |   |
| IPI:IPI00289838.5 | 172  | 19.9  | 8.15 | Isoform 3 of N-acetyltransferase ESCO1                                    | 22.53  | 2 |        |   |
| IPI:IPI00171791.7 | 2116 | 246.0 | 5.03 | Isoform 3 of Ninein                                                       | 71.10  | 2 | 50.85  | 3 |
| IPI:IPI00719643.4 | 2644 | 299.2 | 7.21 | Isoform 3 of Probable helicase senataxin                                  | 243.48 | 2 | 101.92 | 2 |
| IPI:IPI00642382.1 | 299  | 30.6  | 4.55 | Isoform 3 of Proline-rich transmembrane protein 2                         | 10.75  | 2 |        |   |
| IPI:IPI00218698.2 | 641  | 71.9  | 6.64 | Isoform 3 of Protein 4.1                                                  | 26.77  | 2 | 15.46  | 2 |
| IPI:IPI00807621.1 | 1214 | 130.8 | 8.16 | Isoform 3 of Protein cordon-bleu                                          | 52.37  | 2 |        |   |
| IPI:IPI00386012.4 | 612  | 69.1  | 4.92 | Isoform 3 of Protein IWS1 homolog                                         | 29.73  | 2 | 24.23  | 2 |
| IPI:IPI00965991.1 | 603  | 66.0  | 8.48 | Isoform 3 of Serine/threonine-protein kinase N1                           | 16.67  | 2 |        |   |
| IPI:IPI00479471.3 | 596  | 69.1  | 7.33 | Isoform 3 of Spermatogenesis-associated protein 13                        | 51.73  | 2 |        |   |
| IPI:IPI00894101.1 | 397  | 45.3  | 8.24 | Isoform 3 of Tetratricopeptide repeat protein 23-like                     | 15.27  | 2 |        |   |
| IPI:IPI00655534.3 | 1061 | 121.7 | 6.20 | Isoform 3 of Ubiquitin conjugation factor E4 B                            | 49.24  | 2 | 26.75  | 4 |
| IPI:IPI00385803.1 | 316  | 35.4  | 7.71 | Isoform 3 of Uncharacterized protein KIAA0895-like                        | 29.42  | 2 | 34.93  | 2 |
| IPI:IPI00218928.2 | 839  | 93.4  | 6.32 | Isoform 3B of Desmocollin-3                                               | 57.29  | 2 |        |   |
| IPI:IPI00216562.3 | 3319 | 365.4 | 4.65 | Isoform 4 of Cadherin-23                                                  | 55.37  | 2 |        |   |
| IPI:IPI00884969.1 | 435  | 48.8  | 6.70 | Isoform 4 of Calcium-binding mitochondrial carrier protein SCaMC-3        | 26.29  | 2 | 32.63  | 3 |
| IPI:IPI00921488.1 | 487  | 55.1  | 6.61 | Isoform 4 of COP9 signalosome complex subunit 1                           | 28.88  | 2 |        |   |
| IPI:IPI00917607.1 | 638  | 74.4  | 5.43 | Isoform 4 of Hyaluronan mediated motility receptor                        | 100.52 | 2 |        |   |
| IPI:IPI00604511.2 | 602  | 68.7  | 6.13 | Isoform 4 of MAGUK p55 subfamily member 4                                 | 13.05  | 2 |        |   |
| IPI:IPI00922436.1 | 759  | 85.3  | 6.93 | Isoform 4 of Mitogen-activated protein kinase kinase kinase 13            | 23.35  | 2 |        |   |
| IPI:IPI00418489.3 | 1049 | 114.0 | 6.02 | Isoform 4 of MKL/myocardin-like protein 2                                 | 17.89  | 2 | 13.17  | 2 |
| IPI:IPI00607778.2 | 1779 | 202.9 | 5.77 | Isoform 4 of Myosin-14                                                    | 32.18  | 2 | 51.12  | 3 |
| IPI:IPI00786896.1 | 1695 | 192.9 | 9.20 | Isoform 4 of Nebulin-related-anchoring protein                            | 53.75  | 2 |        |   |
| IPI:IPI00935789.2 | 337  | 39.0  | 9.33 | Isoform 4 of Phosphatidylinositol-3,4,5-trisphosphate 3-phosphatase TPTE2 | 27.61  | 2 |        |   |
| IPI:IPI00384121.2 | 328  | 36.0  | 5.35 | Isoform 4 of Protein NDRG2                                                | 50.70  | 2 |        |   |
| IPI:IPI00414275.6 | 413  | 49.3  | 9.39 | Isoform 4 of Putative tyrosine-protein phosphatase TPTE                   | 50.92  | 2 | 27.16  | 2 |
| IPI:IPI00477663.1 | 960  | 106.3 | 4.49 | Isoform 4 of Reticulon-4                                                  | 21.72  | 2 | 22.02  | 2 |
| IPI:IPI01008859.1 | 232  | 25.3  | 9.28 | Isoform 4 of SH3 domain-containing protein 21                             | 19.22  | 2 |        |   |

|                   |      |       |      |                                                                             |        |   |       |   |
|-------------------|------|-------|------|-----------------------------------------------------------------------------|--------|---|-------|---|
| IPI:IPI00943921.1 | 910  | 102.5 | 7.96 | Isoform 4 of Synaptotagmin-like protein 2                                   | 29.84  | 2 | 17.76 | 2 |
| IPI:IPI00552923.1 | 1259 | 144.6 | 6.87 | Isoform 4 of Terminal uridylyltransferase 7                                 | 18.57  | 2 |       |   |
| IPI:IPI00296039.7 | 284  | 32.8  | 4.77 | Isoform 4 of Tropomyosin alpha-1 chain                                      | 31.15  | 2 |       |   |
| IPI:IPI00853082.2 | 383  | 44.3  | 9.28 | Isoform 4 of Uncharacterized coiled-coil domain-containing protein KIAA1984 | 18.80  | 2 | 17.86 | 3 |
| IPI:IPI00386049.4 | 1387 | 154.4 | 7.08 | Isoform 5 of DENN domain-containing protein 4C                              | 25.94  | 2 |       |   |
| IPI:IPI00929518.3 | 1322 | 145.4 | 6.90 | Isoform 5 of HEAT repeat-containing protein 8                               | 54.80  | 2 |       |   |
| IPI:IPI00398205.1 | 596  | 67.4  | 8.53 | Isoform 5 of WD and tetratricopeptide repeats protein 1                     | 20.89  | 2 |       |   |
| IPI:IPI00215954.1 | 643  | 72.0  | 7.94 | Isoform 6 of Protein MTO1 homolog, mitochondrial                            | 17.67  | 2 |       |   |
| IPI:IPI00741668.3 | 1347 | 147.0 | 5.55 | Isoform 7 of Homeobox protein cut-like 1                                    | 24.48  | 2 | 36.08 | 2 |
| IPI:IPI00893272.2 | 2552 | 286.0 | 5.17 | Isoform 7 of Transcription factor TFIIB component B" homolog                | 103.80 | 2 |       |   |
| IPI:IPI00887584.1 | 379  | 44.1  | 6.14 | Isoform 8 of GRINL1A complex locus protein 1                                | 45.87  | 2 | 15.95 | 2 |
| IPI:IPI00854577.1 | 536  | 59.1  | 9.41 | Isoform 8 of Methyl-CpG-binding domain protein 1                            | 19.39  | 2 | 32.33 | 2 |
| IPI:IPI00794464.1 | 1843 | 198.4 | 6.15 | Isoform A of Xin actin-binding repeat-containing protein 1                  | 51.31  | 2 |       |   |
| IPI:IPI00219099.1 | 410  | 46.8  | 7.64 | Isoform Alpha-1 of Thyroid hormone receptor alpha                           | 72.97  | 2 |       |   |
| IPI:IPI00220752.3 | 1118 | 121.9 | 5.90 | Isoform Alpha-7X2A of Integrin alpha-7                                      | 18.78  | 2 |       |   |
| IPI:IPI00655927.1 | 1363 | 146.4 | 9.61 | Isoform B of Proteoglycan 4                                                 | 16.95  | 2 | 43.48 | 2 |
| IPI:IPI00002212.1 | 443  | 49.3  | 5.69 | Isoform B of Serine/threonine-protein kinase 24                             | 17.02  | 2 |       |   |
| IPI:IPI00029700.1 | 2012 | 222.1 | 7.68 | Isoform Long of Down syndrome cell adhesion molecule                        | 47.00  | 2 | 29.75 | 2 |
| IPI:IPI00025273.1 | 1010 | 107.7 | 6.70 | Isoform Long of Trifunctional purine biosynthetic protein adenosine-3       | 52.40  | 2 | 52.55 | 2 |
| IPI:IPI00395633.3 | 598  | 69.0  | 8.34 | Isoform PPEF-2(S) of Serine/threonine-protein phosphatase with EF-hands 2   | 22.70  | 2 |       |   |
| IPI:IPI00220207.1 | 752  | 84.0  | 7.24 | Isoform SH-iPLA2 of 85 kDa calcium-independent phospholipase A2             | 10.40  | 2 | 15.01 | 2 |
| IPI:IPI00215972.2 | 802  | 92.8  | 5.52 | Isoform Short of Vacuolar protein sorting-associated protein 41 homolog     | 60.74  | 2 | 43.80 | 2 |
| IPI:IPI00024414.1 | 397  | 45.2  | 9.25 | Isoform SV7 of Cyclin-dependent kinase 11A                                  | 14.24  | 2 |       |   |
| IPI:IPI00215629.1 | 1642 | 181.9 | 4.89 | Isoform V2 of Versican core protein                                         | 20.74  | 2 | 30.98 | 2 |
| IPI:IPI00607777.2 | 2986 | 340.0 | 6.07 | kalirin isoform 1                                                           | 73.30  | 2 | 66.75 | 4 |
| IPI:IPI00328609.3 | 427  | 48.5  | 7.75 | Kallistatin                                                                 | 29.06  | 2 | 20.74 | 2 |

|                   |      |       |       |                                                                       |        |   |        |    |
|-------------------|------|-------|-------|-----------------------------------------------------------------------|--------|---|--------|----|
| IPI:IPI00382577.1 | 116  | 12.7  | 8.00  | Kappa 1 light chain variable region (Fragment)                        | 116.55 | 2 | 56.66  | 2  |
| IPI:IPI00789455.3 | 490  | 55.4  | 6.74  | Katanin p60 ATPase-containing subunit A-like 1                        | 22.65  | 2 |        |    |
| IPI:IPI00031423.1 | 404  | 46.2  | 4.84  | Keratin, type I cuticular Ha3-II                                      | 17.39  | 2 | 16.56  | 2  |
| IPI:IPI00009865.4 | 584  | 58.8  | 5.21  | Keratin, type I cytoskeletal 10                                       | 15.92  | 2 | 63.75  | 6  |
| IPI:IPI00290077.3 | 456  | 49.2  | 4.77  | Keratin, type I cytoskeletal 15                                       | 38.04  | 2 | 34.54  | 3  |
| IPI:IPI00479145.3 | 400  | 44.1  | 5.14  | Keratin, type I cytoskeletal 19                                       | 23.96  | 2 | 10.81  | 2  |
| IPI:IPI00021298.1 | 424  | 48.5  | 5.69  | Keratin, type I cytoskeletal 20                                       | 31.66  | 2 |        |    |
| IPI:IPI00304458.2 | 422  | 48.1  | 6.54  | Keratin, type I cytoskeletal 23                                       | 204.33 | 2 |        |    |
| IPI:IPI00220327.4 | 644  | 66.0  | 8.12  | Keratin, type II cytoskeletal 1                                       | 38.99  | 2 | 198.64 | 15 |
| IPI:IPI00797452.3 | 534  | 57.2  | 6.61  | Keratin, type II cytoskeletal 4                                       | 51.02  | 2 |        |    |
| IPI:IPI00009867.3 | 590  | 62.3  | 7.74  | Keratin, type II cytoskeletal 5                                       | 19.03  | 2 | 44.88  | 6  |
| IPI:IPI01015893.1 | 2011 | 215.1 | 11.97 | KIAA0324                                                              | 21.99  | 2 |        |    |
| IPI:IPI00874228.2 | 1367 | 147.2 | 10.17 | KIAA1683 isoform a                                                    | 102.28 | 2 |        |    |
| IPI:IPI01015315.1 | 1791 | 201.9 | 5.54  | KIF1A variant protein                                                 | 26.87  | 2 | 38.18  | 2  |
| IPI:IPI00642545.1 | 748  | 86.2  | 5.03  | kinesin-associated protein 3 isoform 3                                | 34.17  | 2 | 30.56  | 3  |
| IPI:IPI00394856.7 | 1343 | 150.5 | 6.79  | Kinesin-like protein KIF7                                             | 53.64  | 2 |        |    |
| IPI:IPI00642473.2 | 249  | 28.0  | 5.40  | kinetochore-associated protein DSN1 homolog isoform 2                 | 10.90  | 2 |        |    |
| IPI:IPI00743994.2 | 3277 | 360.0 | 7.24  | laminin subunit alpha-3 isoform 3                                     | 67.72  | 2 | 56.21  | 3  |
| IPI:IPI00013976.4 | 1786 | 197.9 | 4.94  | Laminin subunit beta-1                                                | 48.77  | 2 | 42.59  | 2  |
| IPI:IPI01009486.1 | 477  | 52.9  | 6.76  | LBP protein                                                           | 11.81  | 2 |        |    |
| IPI:IPI00291395.2 | 674  | 74.0  | 6.44  | leucine-rich repeat transmembrane protein FLRT1                       | 110.73 | 2 |        |    |
| IPI:IPI00005516.1 | 653  | 72.7  | 7.05  | Leucine-rich repeat-containing protein 4                              | 71.66  | 2 | 62.20  | 2  |
| IPI:IPI00060474.1 | 670  | 75.9  | 6.23  | Leucine-rich repeat-containing protein 45                             | 28.78  | 2 |        |    |
| IPI:IPI00855741.1 | 398  | 45.5  | 6.84  | Lipase member N                                                       | 46.65  | 2 |        |    |
| IPI:IPI00788666.3 | 2211 | 252.4 | 5.43  | lipoygenase homology domain-containing protein 1 isoform 1            | 57.12  | 2 | 52.93  | 2  |
| IPI:IPI00006375.1 | 373  | 42.5  | 8.37  | Lipoyltransferase 1, mitochondrial                                    | 55.12  | 2 | 29.68  | 2  |
| IPI:IPI00219217.3 | 334  | 36.6  | 6.05  | L-lactate dehydrogenase B chain                                       | 15.52  | 2 |        |    |
| IPI:IPI00642982.1 | 763  | 85.6  | 6.04  | LONP1 protein                                                         | 13.06  | 2 |        |    |
| IPI:IPI00741005.7 | 2856 | 315.0 | 6.84  | MAX gene-associated protein isoform 2                                 | 89.57  | 2 | 57.26  | 2  |
| IPI:IPI00301082.1 | 309  | 34.3  | 4.86  | Melanoma-associated antigen 1                                         | 25.12  | 2 |        |    |
| IPI:IPI01012840.1 | 552  | 60.4  | 7.14  | metal transporter CNNM2 isoform 3                                     | 10.38  | 2 |        |    |
| IPI:IPI00929575.7 | 363  | 39.8  | 8.75  | methenyltetrahydrofolate synthase domain-containing protein isoform 5 | 19.59  | 2 |        |    |
| IPI:IPI00797802.1 | 263  | 28.5  | 9.89  | mitochondrial 2-oxoglutarate/malate carrier protein isoform 3         | 50.67  | 2 |        |    |
| IPI:IPI00306516.1 | 452  | 51.3  | 8.32  | Mitochondrial import inner membrane translocase subunit TIM44         | 17.20  | 2 |        |    |
| IPI:IPI00855985.2 | 1512 | 164.4 | 7.74  | Mitogen-activated protein kinase kinase kinase 1                      | 34.56  | 2 | 25.17  | 2  |
| IPI:IPI00465246.5 | 1711 | 189.6 | 6.06  | MON2 protein                                                          | 38.76  | 2 | 23.75  | 2  |
| IPI:IPI00006620.2 | 523  | 57.4  | 7.81  | Monocarboxylate transporter 7                                         | 6.77   | 2 |        |    |

|                   |      |       |       |                                                                       |        |   |        |   |
|-------------------|------|-------|-------|-----------------------------------------------------------------------|--------|---|--------|---|
| IPI:IPI00556050.1 | 272  | 29.4  | 5.26  | mu-crystallin homolog isoform 2                                       | 31.30  | 2 |        |   |
| IPI:IPI00385965.1 | 214  | 23.6  | 11.62 | My017 protein                                                         | 22.49  | 2 |        |   |
| IPI:IPI00552823.1 | 144  | 16.5  | 8.73  | Myosin, heavy chain 7B, cardiac muscle, beta                          | 15.49  | 2 |        |   |
| IPI:IPI00025879.2 | 1939 | 223.0 | 5.74  | Myosin-1                                                              | 70.73  | 2 | 62.35  | 2 |
| IPI:IPI00854841.1 | 117  | 12.8  | 5.36  | Myosin-reactive immunoglobulin heavy chain variable region            | 43.56  | 2 | 19.76  | 2 |
| IPI:IPI00384392.1 | 118  | 12.9  | 6.58  | Myosin-reactive immunoglobulin heavy chain variable region (Fragment) | 285.93 | 2 | 139.42 | 2 |
| IPI:IPI00384407.1 | 124  | 13.6  | 8.43  | Myosin-reactive immunoglobulin heavy chain variable region (Fragment) | 154.20 | 2 | 65.19  | 4 |
| IPI:IPI00384409.1 | 119  | 13.2  | 8.79  | Myosin-reactive immunoglobulin heavy chain variable region (Fragment) | 137.92 | 2 | 45.25  | 3 |
| IPI:IPI00384401.1 | 109  | 11.8  | 8.51  | Myosin-reactive immunoglobulin kappa chain variable region (Fragment) | 73.01  | 2 | 47.57  | 2 |
| IPI:IPI00398220.1 | 108  | 11.7  | 7.96  | Myosin-reactive immunoglobulin light chain variable region (Fragment) | 126.90 | 2 |        |   |
| IPI:IPI00384398.1 | 107  | 11.5  | 8.48  | Myosin-reactive immunoglobulin light chain variable region (Fragment) | 117.80 | 2 |        |   |
| IPI:IPI00975656.1 | 156  | 19.0  | 7.15  | NADH dehydrogenase [ubiquinone] 1 beta subcomplex subunit 9-like      | 86.38  | 2 |        |   |
| IPI:IPI00103483.1 | 580  | 65.7  | 6.13  | Negative elongation factor B                                          | 43.91  | 2 | 18.93  | 3 |
| IPI:IPI00045550.4 | 817  | 89.3  | 4.97  | neurabin-2                                                            | 9.68   | 2 | 11.27  | 2 |
| IPI:IPI01011585.1 | 2943 | 327.3 | 6.16  | Neurobeachin, isoform CRA_e                                           | 71.93  | 2 | 31.65  | 2 |
| IPI:IPI00979646.1 | 890  | 102.9 | 5.02  | neuroblastoma breakpoint family member 20-like isoform 4              | 23.37  | 2 |        |   |
| IPI:IPI00334238.1 | 500  | 52.8  | 6.21  | Neuronal pentraxin receptor                                           | 28.19  | 2 |        |   |
| IPI:IPI00025474.1 | 257  | 29.3  | 9.39  | Neurotrophin-3                                                        | 25.62  | 2 | 24.84  | 2 |
| IPI:IPI00815773.1 | 598  | 67.5  | 6.21  | Neutrophil cytosol factor 2 variant (Fragment)                        | 20.41  | 2 | 23.03  | 2 |
| IPI:IPI00297241.4 | 2271 | 254.2 | 6.47  | Nucleolar pre-ribosomal-associated protein 1                          | 103.84 | 2 |        |   |
| IPI:IPI00383451.1 | 100  | 11.2  | 7.94  | OSBPL1A protein                                                       | 15.73  | 2 |        |   |
| IPI:IPI00515017.5 | 638  | 73.6  | 7.61  | outer dense fiber protein 2 isoform 7                                 | 71.76  | 2 | 55.02  | 3 |
| IPI:IPI00956229.1 | 166  | 18.6  | 9.23  | patatin-like phospholipase domain-containing protein 4 isoform 2      | 19.12  | 2 | 20.42  | 3 |
| IPI:IPI00853162.3 | 388  | 43.9  | 9.23  | Pentatricopeptide repeat-containing protein 2                         | 54.15  | 2 |        |   |
| IPI:IPI00065484.1 | 246  | 27.7  | 10.17 | Peptidyl-tRNA hydrolase 2, mitochondrial precursor                    | 21.43  | 2 | 15.28  | 2 |
| IPI:IPI00816500.1 | 324  | 36.9  | 9.98  | PEX12 protein (Fragment)                                              | 7.47   | 2 |        |   |
| IPI:IPI00979246.1 | 193  | 23.0  | 8.63  | phosphatidylinositol-3,4,5-trisphosphate 3-phosphatase TPTE2-like     | 52.83  | 2 |        |   |
| IPI:IPI00006114.5 | 418  | 46.3  | 6.38  | Pigment epithelium-derived factor                                     | 13.18  | 2 | 10.72  | 3 |

|                   |      |       |       |                                                                                |        |   |        |   |
|-------------------|------|-------|-------|--------------------------------------------------------------------------------|--------|---|--------|---|
| IPI:IPI00550995.2 | 290  | 32.3  | 5.14  | PIH1 domain-containing protein 1                                               | 14.35  | 2 |        |   |
| IPI:IPI00171516.2 | 442  | 50.6  | 8.79  | Plasmalemma vesicle-associated protein                                         | 14.29  | 2 | 22.29  | 2 |
| IPI:IPI00855913.1 | 166  | 18.7  | 7.85  | Plasminogen                                                                    | 16.46  | 2 | 20.31  | 4 |
| IPI:IPI01015497.1 | 68   | 7.8   | 8.18  | Plasminogen-related protein A (Fragment)                                       | 64.29  | 2 |        |   |
| IPI:IPI00022445.1 | 128  | 13.9  | 8.79  | Platelet basic protein                                                         | 26.07  | 2 |        |   |
| IPI:IPI00642944.1 | 615  | 67.9  | 9.45  | Poly(A) binding protein, cytoplasmic 4 (Inducible form), isoform CRA_e         | 43.27  | 2 | 69.35  | 2 |
| IPI:IPI00299040.2 | 968  | 109.6 | 5.69  | Polycystin-2                                                                   | 46.69  | 2 | 34.86  | 3 |
| IPI:IPI00790334.1 | 2259 | 258.2 | 6.46  | Polymerase (DNA directed), epsilon, isoform CRA_a                              | 45.38  | 2 | 48.90  | 2 |
| IPI:IPI00744711.2 | 783  | 85.9  | 7.77  | Polyribonucleotide nucleotidyltransferase 1, mitochondrial                     | 26.81  | 2 | 32.99  | 2 |
| IPI:IPI00936321.2 | 483  | 54.5  | 7.65  | POTE ankyrin domain family member D-like isoform 2, partial                    | 55.93  | 2 | 11.48  | 2 |
| IPI:IPI00385453.3 | 691  | 76.8  | 8.79  | PR domain zinc finger protein 1 isoform 2                                      | 32.13  | 2 |        |   |
| IPI:IPI00177381.9 | 908  | 105.4 | 7.03  | Pre-mRNA-splicing factor CWC22 homolog                                         | 42.59  | 2 | 27.12  | 3 |
| IPI:IPI00017391.5 | 347  | 37.3  | 9.33  | probable bifunctional methylenetetrahydrofolate dehydrogenase/cyclohydrolase 2 | 391.67 | 2 |        |   |
| IPI:IPI00291138.1 | 776  | 88.1  | 8.19  | Probable E3 ubiquitin-protein ligase HECTD2                                    | 36.16  | 2 | 23.06  | 2 |
| IPI:IPI00064461.4 | 797  | 88.9  | 8.46  | Probable G-protein coupled receptor 128                                        | 37.68  | 2 | 29.94  | 2 |
| IPI:IPI00374975.2 | 254  | 28.8  | 6.65  | Probable phosphoglycerate mutase 4                                             | 17.76  | 2 |        |   |
| IPI:IPI00246058.1 | 868  | 96.0  | 6.52  | Programmed cell death 6-interacting protein                                    | 25.70  | 2 | 21.20  | 2 |
| IPI:IPI00550815.1 | 585  | 64.3  | 10.35 | Proline-rich protein 14                                                        | 36.45  | 2 |        |   |
| IPI:IPI00552419.3 | 681  | 75.0  | 7.36  | propionyl-CoA carboxylase alpha chain, mitochondrial isoform c precursor       | 214.56 | 2 | 154.95 | 2 |
| IPI:IPI00555749.1 | 345  | 38.7  | 6.47  | Proteasome 26S ATPase subunit 5 variant (Fragment)                             | 120.54 | 2 | 82.51  | 2 |
| IPI:IPI00979663.1 | 192  | 21.7  | 5.33  | Protein                                                                        | 31.01  | 2 |        |   |
| IPI:IPI01015972.1 | 197  | 21.8  | 9.44  | Protein                                                                        | 27.77  | 2 | 21.32  | 2 |
| IPI:IPI00964376.1 | 217  | 23.4  | 9.17  | Protein                                                                        | 45.47  | 2 |        |   |
| IPI:IPI00894050.1 | 269  | 29.0  | 7.08  | Protein                                                                        | 25.88  | 2 | 45.16  | 2 |
| IPI:IPI01011593.1 | 396  | 44.1  | 8.18  | Protein                                                                        | 18.35  | 2 | 42.16  | 2 |
| IPI:IPI00979880.1 | 148  | 16.4  | 10.54 | Protein                                                                        | 10.98  | 2 |        |   |
| IPI:IPI00967932.1 | 245  | 28.4  | 6.15  | Protein                                                                        | 42.65  | 2 | 47.68  | 2 |
| IPI:IPI01011700.1 | 165  | 17.7  | 8.84  | Protein                                                                        | 27.36  | 2 |        |   |
| IPI:IPI00828098.2 | 5256 | 596.1 | 6.43  | protein ALO17 isoform 1                                                        | 89.02  | 2 | 69.10  | 7 |
| IPI:IPI00291723.3 | 608  | 69.5  | 8.27  | Protein FAM116A                                                                | 40.30  | 2 |        |   |
| IPI:IPI00297208.7 | 1060 | 121.0 | 6.18  | Protein FAM184B                                                                | 44.97  | 2 | 37.24  | 2 |
| IPI:IPI00217802.2 | 893  | 103.7 | 9.01  | Protein FAM186B                                                                | 23.22  | 2 | 30.00  | 2 |
| IPI:IPI00394830.6 | 304  | 34.8  | 8.66  | Protein FAM92B                                                                 | 42.91  | 2 |        |   |
| IPI:IPI00746419.1 | 3016 | 339.1 | 5.86  | Protein furry homolog                                                          | 65.99  | 2 | 46.62  | 3 |
| IPI:IPI00184572.5 | 683  | 77.8  | 7.77  | Protein kinase C eta type                                                      | 53.82  | 2 | 51.38  | 2 |
| IPI:IPI00328350.6 | 928  | 103.1 | 4.78  | Protein Niban                                                                  | 28.69  | 2 | 30.04  | 3 |

|                   |      |       |       |                                                                                                    |       |   |       |   |
|-------------------|------|-------|-------|----------------------------------------------------------------------------------------------------|-------|---|-------|---|
| IPI:IPI00604451.1 | 652  | 73.8  | 4.88  | protein OS-9 isoform 4 precursor                                                                   | 31.80 | 2 |       |   |
| IPI:IPI00064744.3 | 210  | 24.6  | 10.68 | Putative ALMS1-like protein                                                                        | 19.21 | 2 |       |   |
| IPI:IPI00981564.1 | 421  | 47.7  | 7.20  | putative alpha-1-antitrypsin-related protein-like                                                  | 48.90 | 2 | 38.62 | 2 |
| IPI:IPI00004069.2 | 761  | 85.0  | 7.39  | Putative deoxyribonuclease TATDN2                                                                  | 19.56 | 2 |       |   |
| IPI:IPI00152688.1 | 469  | 51.7  | 7.96  | Putative methyltransferase NSUN6                                                                   | 53.62 | 2 | 44.32 | 2 |
| IPI:IPI00736595.4 | 583  | 65.9  | 6.98  | Putative rhopilin-2-like protein                                                                   | 32.39 | 2 |       |   |
| IPI:IPI00065521.5 | 529  | 60.2  | 6.54  | Putative tRNA pseudouridine synthase Pus10                                                         | 35.47 | 2 | 14.37 | 2 |
| IPI:IPI00737068.4 | 335  | 38.6  | 8.22  | putative ubiquitin carboxyl-terminal hydrolase 41                                                  | 27.66 | 2 | 32.25 | 2 |
| IPI:IPI00412107.5 | 292  | 35.0  | 5.50  | Putative uncharacterized protein DKFZp781D1722                                                     | 43.75 | 2 | 41.45 | 2 |
| IPI:IPI00871170.3 | 634  | 73.4  | 9.79  | Putative uncharacterized protein ENSP00000382790                                                   | 28.42 | 2 |       |   |
| IPI:IPI00873709.4 | 505  | 55.3  | 13.30 | Putative uncharacterized protein ENSP00000383309                                                   | 11.03 | 2 |       |   |
| IPI:IPI00807371.2 | 824  | 94.7  | 7.93  | Putative uncharacterized protein FLJ21901                                                          | 86.89 | 2 | 25.38 | 2 |
| IPI:IPI00029426.1 | 43   | 4.9   | 8.62  | Putative uncharacterized protein PRO1716                                                           | 17.53 | 2 |       |   |
| IPI:IPI00784524.3 | 223  | 24.6  | 10.46 | Putative UPF0607 protein LOC392364                                                                 | 15.35 | 2 |       |   |
| IPI:IPI00383970.2 | 696  | 79.0  | 4.97  | PWWP domain-containing protein MUMIL1                                                              | 21.95 | 2 |       |   |
| IPI:IPI00955815.2 | 359  | 40.2  | 8.28  | pyruvate dehydrogenase E1 component subunit alpha, somatic form, mitochondrial isoform 4 precursor | 10.80 | 2 |       |   |
| IPI:IPI00792427.1 | 1159 | 133.8 | 7.34  | RAD51-associated protein 2                                                                         | 25.63 | 2 | 40.99 | 3 |
| IPI:IPI00017367.6 | 604  | 71.0  | 6.71  | Radixin, isoform CRA_a                                                                             | 31.17 | 2 | 28.82 | 2 |
| IPI:IPI00921207.2 | 1758 | 197.4 | 6.33  | RanBP2-like and GRIP domain-containing protein 3                                                   | 56.96 | 2 | 38.02 | 3 |
| IPI:IPI00049961.1 | 507  | 56.9  | 5.41  | Ras association domain-containing protein 10                                                       | 14.04 | 2 |       |   |
| IPI:IPI00006854.1 | 1139 | 128.5 | 8.24  | Ras GTPase-activating protein nGAP                                                                 | 56.80 | 2 |       |   |
| IPI:IPI00016513.5 | 200  | 22.5  | 8.38  | Ras-related protein Rab-10                                                                         | 6.64  | 2 | 10.97 | 2 |
| IPI:IPI00795882.2 | 1257 | 143.1 | 7.28  | ras-specific guanine nucleotide-releasing factor 1 isoform 3                                       | 44.40 | 2 |       |   |
| IPI:IPI00217874.2 | 523  | 58.0  | 9.01  | REST corepressor 2                                                                                 | 21.42 | 2 |       |   |
| IPI:IPI00219718.3 | 197  | 22.3  | 6.13  | retinol-binding protein 1 isoform a                                                                | 11.93 | 2 |       |   |
| IPI:IPI00829887.1 | 280  | 32.5  | 9.85  | Reverse transcriptase-like protein                                                                 | 29.91 | 2 | 20.27 | 2 |
| IPI:IPI00815662.1 | 119  | 12.8  | 8.79  | Rheumatoid factor G9 heavy chain (Fragment)                                                        | 90.01 | 2 |       |   |
| IPI:IPI00157442.1 | 1522 | 167.6 | 5.50  | Rho guanine nucleotide exchange factor 11                                                          | 55.42 | 2 |       |   |
| IPI:IPI00023467.1 | 621  | 68.2  | 9.33  | RNA polymerase II elongation factor ELL                                                            | 16.61 | 2 |       |   |
| IPI:IPI00940357.2 | 195  | 21.9  | 9.61  | RNA-directed DNA polymerase (reverse transcriptase) domain containing protein                      | 15.82 | 2 | 27.43 | 2 |

|                   |      |       |       |                                                                        |        |   |        |   |
|-------------------|------|-------|-------|------------------------------------------------------------------------|--------|---|--------|---|
| IPI:IPI00975939.1 | 208  | 23.3  | 8.98  | SAA2-SAA2 protein                                                      | 20.56  | 2 | 9.57   | 2 |
| IPI:IPI00010970.3 | 894  | 100.5 | 6.55  | Scm-like with four MBT domains protein 2                               | 288.16 | 2 | 143.64 | 2 |
| IPI:IPI00217690.1 | 436  | 49.6  | 8.35  | Serine/threonine-protein kinase NIM1                                   | 45.89  | 2 |        |   |
| IPI:IPI00807602.1 | 1275 | 142.4 | 6.29  | Serine/threonine-protein kinase ULK4                                   | 31.97  | 2 | 13.31  | 2 |
| IPI:IPI00304557.2 | 249  | 27.0  | 5.59  | Short palate, lung and nasal epithelium carcinoma-associated protein 2 | 22.22  | 2 |        |   |
| IPI:IPI00916907.2 | 1260 | 143.9 | 7.68  | shugoshin-like 2 isoform 2                                             | 31.57  | 2 |        |   |
| IPI:IPI00187002.8 | 1264 | 137.8 | 9.16  | sickle tail protein homolog isoform 2                                  | 45.04  | 2 | 35.64  | 2 |
| IPI:IPI00929464.1 | 455  | 50.3  | 8.94  | signal recognition particle 54 kDa protein isoform 2                   | 39.85  | 2 |        |   |
| IPI:IPI00976496.1 | 115  | 12.7  | 8.47  | Similar to Cold agglutinin FS-1 H-chain                                | 146.09 | 2 |        |   |
| IPI:IPI00829759.3 | 118  | 12.9  | 7.85  | Similar to Immunglobulin heavy chain variable region                   | 36.70  | 2 |        |   |
| IPI:IPI00872947.2 | 1909 | 212.5 | 6.60  | Similar to Plexin A2                                                   | 30.70  | 2 | 30.16  | 2 |
| IPI:IPI00738099.2 | 683  | 74.4  | 11.65 | Similar to polycystic kidney disease 1-like 3                          | 21.13  | 2 | 26.76  | 2 |
| IPI:IPI00985211.1 | 178  | 18.8  | 6.60  | Similar to VH-3 family (VH26)D/J protein                               | 20.00  | 2 |        |   |
| IPI:IPI00854667.1 | 117  | 12.7  | 7.87  | Single chain Fv                                                        | 23.23  | 2 |        |   |
| IPI:IPI00004970.5 | 2785 | 318.2 | 7.39  | Small subunit processome component 20 homolog                          | 54.90  | 2 |        |   |
| IPI:IPI00167024.4 | 556  | 64.7  | 5.91  | SNX25 protein                                                          | 51.22  | 2 |        |   |
| IPI:IPI00295376.3 | 691  | 76.4  | 8.57  | Solute carrier organic anion transporter family member 1B1             | 26.01  | 2 | 17.84  | 2 |
| IPI:IPI00927272.1 | 612  | 67.6  | 8.53  | solute carrier organic anion transporter family member 1C1 isoform 4   | 15.97  | 2 |        |   |
| IPI:IPI00844345.4 | 469  | 52.2  | 7.17  | Spermatogenesis-associated protein 21                                  | 12.76  | 2 |        |   |
| IPI:IPI00029764.1 | 501  | 58.8  | 5.38  | Splicing factor 3A subunit 3                                           | 192.31 | 2 |        |   |
| IPI:IPI00954850.2 | 4700 | 516.0 | 6.32  | stAR-related lipid transfer protein 9                                  | 108.81 | 2 |        |   |
| IPI:IPI00221101.5 | 1827 | 209.3 | 5.64  | Sucrase-isomaltase, intestinal                                         | 30.53  | 2 | 39.40  | 2 |
| IPI:IPI00290561.4 | 302  | 35.5  | 8.19  | Sulfotransferase 1C4                                                   | 27.24  | 2 |        |   |
| IPI:IPI00973480.1 | 173  | 19.8  | 7.62  | T-cell receptor gamma chain C region 1                                 | 20.80  | 2 |        |   |
| IPI:IPI00922278.1 | 219  | 24.7  | 6.76  | T-cell receptor gamma chain C region PT-gamma-1/2                      | 16.87  | 2 |        |   |
| IPI:IPI00032988.3 | 1034 | 114.9 | 7.83  | Teashirt homolog 2                                                     | 38.50  | 2 | 29.08  | 3 |
| IPI:IPI00010369.2 | 3069 | 346.4 | 6.34  | Testis expressed sequence 15, isoform CRA_a                            | 61.02  | 2 |        |   |
| IPI:IPI00005634.3 | 1564 | 175.4 | 7.53  | Tetratricopeptide repeat protein 37                                    | 60.07  | 2 | 28.54  | 3 |
| IPI:IPI00374151.1 | 238  | 25.8  | 7.46  | thioredoxin-dependent peroxide reductase, mitochondrial isoform b      | 37.40  | 2 |        |   |
| IPI:IPI00642105.1 | 251  | 27.6  | 9.55  | Transcription initiation factor TFIID subunit 9B                       | 27.22  | 2 |        |   |
| IPI:IPI00000075.3 | 390  | 44.3  | 8.53  | Transforming growth factor beta-1                                      | 69.49  | 2 |        |   |



|                   |      |       |       |                                                                  |        |   |        |   |
|-------------------|------|-------|-------|------------------------------------------------------------------|--------|---|--------|---|
| IPI:IPI00183666.8 | 764  | 85.9  | 5.83  | Transient receptor potential cation channel subfamily V member 2 | 21.70  | 2 |        |   |
| IPI:IPI00031104.5 | 498  | 61.0  | 6.54  | Trichoplein keratin filament-binding protein                     | 45.39  | 2 | 27.33  | 2 |
| IPI:IPI00788628.3 | 164  | 19.3  | 5.88  | Tripartite motif-containing 15                                   | 31.02  | 2 |        |   |
| IPI:IPI00297940.5 | 891  | 101.2 | 8.94  | tubulin polyglutamylase TTLL6 isoform 1                          | 24.92  | 2 |        |   |
| IPI:IPI00657708.2 | 1927 | 208.9 | 4.67  | tumor suppressor p53-binding protein 1 isoform 2                 | 161.59 | 2 | 249.96 | 2 |
| IPI:IPI00304999.4 | 943  | 104.7 | 6.55  | Tyrosine-protein kinase transmembrane receptor ROR2              | 67.66  | 2 |        |   |
| IPI:IPI00914628.2 | 2460 | 277.2 | 6.28  | Ubiquitin carboxyl-terminal hydrolase                            | 511.93 | 2 | 53.71  | 2 |
| IPI:IPI00011092.1 | 913  | 104.0 | 8.70  | Ubiquitin carboxyl-terminal hydrolase 26                         | 134.04 | 2 | 35.56  | 2 |
| IPI:IPI00783378.3 | 1292 | 141.2 | 5.12  | Ubiquitin-conjugating enzyme E2 O                                | 47.55  | 2 |        |   |
| IPI:IPI00917717.2 | 416  | 47.6  | 9.07  | Uncharacterized protein                                          | 795.69 | 2 |        |   |
| IPI:IPI00647664.7 | 859  | 93.2  | 8.37  | Uncharacterized protein                                          | 179.94 | 2 | 237.65 | 2 |
| IPI:IPI00796758.1 | 630  | 73.0  | 7.99  | Uncharacterized protein                                          | 44.35  | 2 |        |   |
| IPI:IPI00908776.2 | 417  | 47.7  | 8.44  | Uncharacterized protein                                          | 22.92  | 2 | 22.34  | 2 |
| IPI:IPI00943799.2 | 321  | 36.6  | 9.03  | Uncharacterized protein                                          | 47.14  | 2 | 37.05  | 2 |
| IPI:IPI00893078.2 | 1934 | 221.6 | 7.03  | Uncharacterized protein                                          | 58.06  | 2 | 40.72  | 2 |
| IPI:IPI00979409.1 | 146  | 15.7  | 9.25  | Uncharacterized protein                                          | 20.54  | 2 |        |   |
| IPI:IPI00185911.5 | 329  | 38.4  | 8.84  | Uncharacterized protein                                          | 20.34  | 2 |        |   |
| IPI:IPI00384764.3 | 499  | 53.1  | 9.33  | Uncharacterized protein                                          | 48.34  | 2 |        |   |
| IPI:IPI00852802.1 | 51   | 5.7   | 7.34  | Uncharacterized protein                                          | 16.88  | 2 |        |   |
| IPI:IPI00028645.4 | 998  | 112.3 | 5.59  | Uncharacterized protein                                          | 49.92  | 2 | 30.41  | 2 |
| IPI:IPI00749279.2 | 100  | 10.9  | 9.99  | Uncharacterized protein                                          | 22.65  | 2 | 14.59  | 2 |
| IPI:IPI00878325.2 | 262  | 30.0  | 8.37  | Uncharacterized protein                                          | 76.99  | 2 |        |   |
| IPI:IPI00980579.1 | 721  | 82.6  | 6.84  | Uncharacterized protein                                          | 18.14  | 2 |        |   |
| IPI:IPI00979987.1 | 976  | 109.1 | 6.84  | Uncharacterized protein                                          | 34.14  | 2 |        |   |
| IPI:IPI00975481.1 | 221  | 24.9  | 10.05 | Uncharacterized protein                                          | 9.87   | 2 |        |   |
| IPI:IPI00976241.3 | 498  | 56.2  | 8.46  | Uncharacterized protein                                          | 23.20  | 2 |        |   |
| IPI:IPI00939255.2 | 1367 | 155.4 | 8.97  | Uncharacterized protein                                          | 23.88  | 2 | 33.51  | 2 |
| IPI:IPI00978749.1 | 119  | 13.5  | 9.88  | Uncharacterized protein                                          | 16.13  | 2 | 30.19  | 2 |
| IPI:IPI00793583.2 | 963  | 110.5 | 7.94  | Uncharacterized protein                                          | 43.02  | 2 | 55.23  | 2 |
| IPI:IPI00985333.1 | 231  | 26.6  | 9.57  | Uncharacterized protein                                          | 7.72   | 2 | 12.71  | 2 |
| IPI:IPI00927458.1 | 133  | 15.6  | 11.44 | Uncharacterized protein                                          | 29.02  | 2 |        |   |
| IPI:IPI00966326.1 | 158  | 18.3  | 9.33  | Uncharacterized protein                                          | 13.50  | 2 |        |   |
| IPI:IPI00807384.2 | 554  | 62.9  | 6.54  | Uncharacterized protein                                          | 24.69  | 2 |        |   |
| IPI:IPI00910144.2 | 478  | 52.4  | 7.17  | Uncharacterized protein                                          | 15.79  | 2 | 12.72  | 2 |
| IPI:IPI00815918.2 | 778  | 87.6  | 8.82  | Uncharacterized protein                                          | 30.36  | 2 | 19.38  | 2 |
| IPI:IPI00975919.1 | 723  | 81.6  | 8.75  | Uncharacterized protein                                          | 62.81  | 2 | 64.70  | 2 |
| IPI:IPI00984044.1 | 517  | 57.2  | 8.63  | Uncharacterized protein                                          | 17.96  | 2 |        |   |
| IPI:IPI00514320.4 | 565  | 62.8  | 6.18  | Uncharacterized protein                                          | 61.14  | 2 |        |   |
| IPI:IPI00968165.1 | 1151 | 130.6 | 7.97  | Uncharacterized protein                                          | 29.30  | 2 |        |   |
| IPI:IPI00947253.1 | 117  | 12.9  | 4.59  | Uncharacterized protein                                          | 17.88  | 2 |        |   |
| IPI:IPI00909521.2 | 296  | 32.9  | 8.75  | Uncharacterized protein                                          | 27.63  | 2 |        |   |
| IPI:IPI00335273.3 | 258  | 29.1  | 9.54  | Uncharacterized protein                                          | 10.75  | 2 | 18.36  | 3 |
| IPI:IPI01018029.1 | 123  | 13.6  | 7.96  | Uncharacterized protein                                          | 18.58  | 2 | 21.66  | 2 |
| IPI:IPI00945801.1 | 273  | 30.5  | 9.69  | Uncharacterized protein                                          | 23.99  | 2 | 44.52  | 2 |
| IPI:IPI00966854.1 | 283  | 30.5  | 7.91  | Uncharacterized protein                                          | 8.18   | 2 |        |   |
| IPI:IPI00964389.2 | 54   | 6.4   | 9.82  | Uncharacterized protein                                          | 20.23  | 2 |        |   |
| IPI:IPI00965555.1 | 124  | 14.1  | 8.46  | Uncharacterized protein                                          | 36.42  | 2 |        |   |
| IPI:IPI01008799.1 | 107  | 12.2  | 5.80  | Uncharacterized protein                                          | 8.16   | 2 |        |   |
| IPI:IPI00514967.3 | 239  | 27.2  | 8.69  | Uncharacterized protein                                          | 21.89  | 2 |        |   |

|                   |      |       |       |                                                                         |        |   |       |   |
|-------------------|------|-------|-------|-------------------------------------------------------------------------|--------|---|-------|---|
| IPI:IPI00893362.1 | 4869 | 551.5 | 5.69  | Uncharacterized protein                                                 | 93.95  | 2 | 89.29 | 2 |
| IPI:IPI00925086.1 | 339  | 38.6  | 8.88  | Uncharacterized protein                                                 | 26.88  | 2 | 14.09 | 2 |
| IPI:IPI00975595.1 | 316  | 35.7  | 8.68  | Uncharacterized protein                                                 | 10.23  | 2 | 11.48 | 2 |
| IPI:IPI00647185.3 | 1624 | 179.5 | 7.18  | Uncharacterized protein                                                 | 44.70  | 2 | 25.63 | 2 |
| IPI:IPI00419908.4 | 2368 | 257.3 | 5.71  | Uncharacterized protein                                                 | 342.33 | 2 | 64.04 | 2 |
| IPI:IPI00798352.1 | 289  | 32.7  | 8.09  | Uncharacterized protein                                                 | 8.70   | 2 |       |   |
| IPI:IPI00944970.1 | 475  | 52.6  | 9.41  | Uncharacterized protein                                                 | 19.58  | 2 |       |   |
| IPI:IPI00868970.4 | 777  | 89.0  | 6.25  | Uncharacterized protein                                                 | 19.16  | 2 |       |   |
| IPI:IPI00965736.1 | 1232 | 134.4 | 5.80  | Uncharacterized protein                                                 | 22.32  | 2 |       |   |
| IPI:IPI00977236.1 | 65   | 7.3   | 10.21 | Uncharacterized protein                                                 | 4.51   | 2 |       |   |
| IPI:IPI00792449.1 | 210  | 22.5  | 9.83  | Uncharacterized protein                                                 | 8.30   | 2 |       |   |
| IPI:IPI00979864.1 | 265  | 27.6  | 5.76  | Uncharacterized protein                                                 | 4.95   | 2 |       |   |
| IPI:IPI00977795.1 | 258  | 29.2  | 7.40  | Uncharacterized protein                                                 | 12.50  | 2 |       |   |
| IPI:IPI00963922.1 | 234  | 26.6  | 5.07  | Uncharacterized protein                                                 | 18.34  | 2 |       |   |
| IPI:IPI00654633.3 | 415  | 46.4  | 9.11  | Uncharacterized protein                                                 | 7.76   | 2 |       |   |
| IPI:IPI00042444.7 | 611  | 70.6  | 9.16  | Uncharacterized protein                                                 | 12.26  | 2 |       |   |
| IPI:IPI00171500.5 | 529  | 61.9  | 9.04  | Uncharacterized protein<br>C14orf45                                     | 32.86  | 2 | 21.86 | 2 |
| IPI:IPI00182427.4 | 570  | 63.1  | 9.20  | Uncharacterized protein<br>C17orf47                                     | 26.10  | 2 | 31.03 | 2 |
| IPI:IPI00645901.1 | 408  | 44.9  | 8.92  | Uncharacterized protein C1orf94                                         | 18.06  | 2 |       |   |
| IPI:IPI00738216.3 | 2266 | 247.7 | 5.48  | Uncharacterized protein<br>KIAA0947                                     | 82.88  | 2 | 54.78 | 2 |
| IPI:IPI00935155.1 | 1595 | 172.7 | 8.78  | uncharacterized protein<br>KIAA1671-like                                | 28.70  | 2 |       |   |
| IPI:IPI00297121.6 | 306  | 33.9  | 8.59  | UPF0549 protein C20orf43                                                | 38.00  | 2 | 26.45 | 3 |
| IPI:IPI00656021.2 | 832  | 94.3  | 6.70  | vacuolar protein sorting-<br>associated protein 53 homolog<br>isoform 1 | 13.30  | 2 |       |   |
| IPI:IPI00827690.1 | 111  | 12.3  | 8.31  | VH-3 family (VH26)D/J protein<br>(Fragment)                             | 33.58  | 2 |       |   |
| IPI:IPI00383732.1 | 147  | 15.8  | 8.38  | VH3 protein (Fragment)                                                  | 38.19  | 2 | 64.97 | 2 |
| IPI:IPI00796070.1 | 372  | 43.0  | 7.40  | Vitamin D 24-hydroxylase splice<br>variant                              | 50.16  | 2 | 13.97 | 2 |
| IPI:IPI00409700.1 | 501  | 57.3  | 7.61  | Vitamin D 25-hydroxylase                                                | 21.68  | 2 |       |   |
| IPI:IPI00888541.1 | 1140 | 129.0 | 6.30  | Werner syndrome ATP-<br>dependent helicase-like, partial                | 36.55  | 2 | 27.12 | 2 |
| IPI:IPI00294542.3 | 523  | 60.1  | 8.59  | WUGSC:H_2G3A.1 protein                                                  | 133.86 | 2 |       |   |
| IPI:IPI00217777.5 | 435  | 49.0  | 6.55  | Zinc finger and BTB domain-<br>containing protein 25                    | 60.21  | 2 | 36.76 | 2 |
| IPI:IPI00183642.2 | 737  | 83.0  | 9.11  | Zinc finger protein 280C                                                | 23.67  | 2 | 23.63 | 2 |
| IPI:IPI00852669.1 | 1163 | 124.2 | 8.72  | Zinc finger protein 516                                                 | 39.20  | 2 | 38.12 | 3 |
| IPI:IPI00006046.4 | 1300 | 141.3 | 7.27  | Zinc finger protein 536                                                 | 69.08  | 2 |       |   |
| IPI:IPI00032442.3 | 538  | 60.5  | 7.61  | Zinc finger protein 554                                                 | 48.78  | 2 | 59.58 | 2 |
| IPI:IPI00787687.3 | 601  | 69.0  | 9.22  | Zinc finger protein 90                                                  | 23.60  | 2 |       |   |
| IPI:IPI00985494.2 | 590  | 67.1  | 8.70  | Zinc finger protein zfp30                                               | 106.97 | 2 | 58.48 | 2 |
| IPI:IPI00926275.1 | 350  | 40.0  | 9.28  | zona pellucida-binding protein 1<br>isoform 2                           | 31.91  | 2 | 20.54 | 2 |
| IPI:IPI01009211.1 | 97   | 11.0  | 8.16  | 11 kDa protein                                                          |        |   | 7.01  | 2 |
| IPI:IPI00974570.1 | 99   | 11.7  | 10.36 | 12 kDa protein                                                          |        |   | 9.28  | 2 |
| IPI:IPI01014757.1 | 154  | 17.3  | 8.59  | 17 kDa protein                                                          |        |   | 23.85 | 2 |
| IPI:IPI01012887.1 | 179  | 20.4  | 4.94  | 20 kDa protein                                                          |        |   | 12.58 | 2 |
| IPI:IPI01011513.1 | 1873 | 207.7 | 6.67  | 208 kDa protein                                                         |        |   | 16.75 | 2 |
| IPI:IPI00977275.1 | 189  | 21.9  | 8.73  | 22 kDa protein                                                          |        |   | 16.21 | 2 |
| IPI:IPI01011154.1 | 199  | 23.8  | 4.72  | 24 kDa protein                                                          |        |   | 12.49 | 2 |
| IPI:IPI00294242.2 | 395  | 45.3  | 9.29  | 28S ribosomal protein S31,<br>mitochondrial                             |        |   | 14.36 | 2 |

|                   |      |       |      |                                                                                                    |  |  |       |   |
|-------------------|------|-------|------|----------------------------------------------------------------------------------------------------|--|--|-------|---|
| IPI:IPI00178897.1 | 302  | 33.3  | 9.11 | 33 kDa protein                                                                                     |  |  | 14.34 | 2 |
| IPI:IPI00980409.1 | 400  | 45.1  | 6.68 | 45 kDa protein                                                                                     |  |  | 13.49 | 2 |
| IPI:IPI00924617.1 | 535  | 61.8  | 5.64 | 62 kDa protein                                                                                     |  |  | 35.84 | 2 |
| IPI:IPI00853248.1 | 554  | 61.5  | 8.90 | 62 kDa protein                                                                                     |  |  | 21.51 | 2 |
| IPI:IPI00946462.1 | 585  | 65.6  | 8.37 | 66 kDa protein                                                                                     |  |  | 24.42 | 2 |
| IPI:IPI01011555.1 | 657  | 71.4  | 6.60 | 71 kDa protein                                                                                     |  |  | 41.12 | 2 |
| IPI:IPI01011035.1 | 636  | 71.7  | 7.58 | 72 kDa protein                                                                                     |  |  | 14.08 | 2 |
| IPI:IPI01011251.1 | 680  | 77.8  | 7.53 | 78 kDa protein                                                                                     |  |  | 37.79 | 3 |
| IPI:IPI00887675.4 | 628  | 78.0  | 5.39 | 78 kDa protein                                                                                     |  |  | 29.24 | 3 |
| IPI:IPI01014601.1 | 756  | 85.1  | 5.26 | 85 kDa protein                                                                                     |  |  | 26.77 | 2 |
| IPI:IPI01011340.1 | 822  | 94.8  | 5.69 | 95 kDa protein                                                                                     |  |  | 47.25 | 2 |
| IPI:IPI00830122.2 | 117  | 12.8  | 8.68 | A30                                                                                                |  |  | 5.00  | 2 |
| IPI:IPI00064737.4 | 376  | 41.7  | 6.79 | Actin-related protein T1                                                                           |  |  | 18.24 | 2 |
| IPI:IPI00419215.6 | 1454 | 161.0 | 5.73 | Alpha-2-macroglobulin-like protein 1                                                               |  |  | 26.55 | 3 |
| IPI:IPI00004957.1 | 460  | 53.6  | 6.70 | Angiopoietin-related protein 3                                                                     |  |  | 28.48 | 2 |
| IPI:IPI00004294.4 | 319  | 36.2  | 7.50 | Ankyrin repeat domain-containing protein 1                                                         |  |  | 42.18 | 2 |
| IPI:IPI00807679.3 | 337  | 36.6  | 8.41 | ankyrin repeat domain-containing protein 60                                                        |  |  | 10.99 | 2 |
| IPI:IPI00956602.1 | 108  | 11.6  | 6.54 | Anti-streptococcal/anti-myosin immunoglobulin lambda light chain variable region (Fragment)        |  |  | 17.69 | 2 |
| IPI:IPI00880121.3 | 74   | 8.7   | 4.88 | Apolipoprotein L, 2                                                                                |  |  | 11.17 | 2 |
| IPI:IPI00975485.1 | 1124 | 125.1 | 6.52 | BAL1-associated protein 3 isoform 5                                                                |  |  | 18.97 | 2 |
| IPI:IPI00184848.5 | 1321 | 146.3 | 6.57 | Bile salt export pump                                                                              |  |  | 42.66 | 2 |
| IPI:IPI00386849.4 | 728  | 79.5  | 4.60 | Cadherin-like 23                                                                                   |  |  | 11.93 | 2 |
| IPI:IPI00220361.3 | 261  | 30.0  | 4.83 | Calbindin                                                                                          |  |  | 9.36  | 2 |
| IPI:IPI00176702.4 | 1249 | 134.7 | 8.35 | Calmodulin-regulated spectrin-associated protein 3                                                 |  |  | 23.51 | 2 |
| IPI:IPI00166153.3 | 835  | 95.3  | 7.05 | Cap-specific mRNA (nucleoside-2'-O-)-methyltransferase 1                                           |  |  | 10.36 | 2 |
| IPI:IPI00017262.1 | 305  | 34.7  | 7.61 | Carbonic anhydrase 5A, mitochondrial                                                               |  |  | 4.73  | 2 |
| IPI:IPI00012213.2 | 1004 | 113.2 | 5.92 | Caspase recruitment domain-containing protein 14                                                   |  |  | 52.93 | 4 |
| IPI:IPI00465436.4 | 527  | 59.7  | 7.39 | Catalase                                                                                           |  |  | 27.04 | 2 |
| IPI:IPI00256795.2 | 398  | 46.4  | 6.30 | Cation channel sperm-associated protein 3                                                          |  |  | 19.31 | 2 |
| IPI:IPI00306723.4 | 1054 | 120.9 | 5.94 | CCAAT/enhancer-binding protein zeta                                                                |  |  | 28.72 | 2 |
| IPI:IPI00921496.2 | 619  | 69.9  | 5.02 | cDNA FLJ16614 fis, clone TESTI4013365                                                              |  |  | 27.28 | 2 |
| IPI:IPI00647578.2 | 276  | 31.5  | 8.98 | cDNA FLJ25467 fis, clone TST09387                                                                  |  |  | 12.26 | 2 |
| IPI:IPI00927743.2 | 334  | 37.0  | 8.28 | cDNA FLJ25692 fis, clone TST04461                                                                  |  |  | 12.64 | 2 |
| IPI:IPI01015239.1 | 504  | 59.1  | 7.42 | cDNA FLJ35854 fis, clone TESTI2007113, highly similar to Afadin- and alpha-actinin-binding protein |  |  | 36.77 | 3 |

|                   |     |       |       |                                                                                                                                                     |  |  |       |   |
|-------------------|-----|-------|-------|-----------------------------------------------------------------------------------------------------------------------------------------------------|--|--|-------|---|
| IPI:IPI01011129.1 | 626 | 68.1  | 9.44  | cDNA FLJ38453 fis, clone FEBRA2019663, highly similar to Homo sapiens DEAD (Asp-Glu-Ala-Asp) box polypeptide 42 (DDX42), transcript variant 2, mRNA |  |  | 54.30 | 2 |
| IPI:IPI00788696.3 | 391 | 44.8  | 9.57  | cDNA FLJ40464 fis, clone TESTI2042264                                                                                                               |  |  | 14.24 | 3 |
| IPI:IPI00644079.4 | 750 | 83.0  | 8.79  | cDNA FLJ44920 fis, clone BRAMY3011501, highly similar to Heterogeneous nuclear ribonucleoprotein U                                                  |  |  | 17.10 | 2 |
| IPI:IPI00217823.7 | 412 | 46.3  | 8.69  | cDNA FLJ45081 fis, clone BRAWH3027880, highly similar to Probable palmitoyltransferase ZDHHC23                                                      |  |  | 17.55 | 2 |
| IPI:IPI01012127.1 | 617 | 67.8  | 7.90  | cDNA FLJ45113 fis, clone BRAWH3034743, weakly similar to Mus musculus microtubule-associated protein 7 (Mtap7), mRNA                                |  |  | 76.02 | 2 |
| IPI:IPI01013531.1 | 962 | 106.9 | 8.19  | cDNA FLJ46254 fis, clone TESTI4023096, highly similar to Solute carrier family 12 member 6                                                          |  |  | 14.33 | 2 |
| IPI:IPI00792841.2 | 445 | 49.0  | 5.48  | cDNA FLJ46620 fis, clone TLUNG2000654, highly similar to Keratin, type II cytoskeletal 7                                                            |  |  | 33.25 | 4 |
| IPI:IPI00337602.4 | 493 | 55.5  | 5.05  | cDNA FLJ50345, highly similar to Zinc finger protein 326                                                                                            |  |  | 22.53 | 2 |
| IPI:IPI00942257.2 | 520 | 55.8  | 6.48  | cDNA FLJ51361, highly similar to Keratin, type II cytoskeletal 6A                                                                                   |  |  | 42.15 | 5 |
| IPI:IPI00921948.1 | 555 | 61.7  | 5.71  | cDNA FLJ52306, highly similar to Kelch-like protein 1                                                                                               |  |  | 52.59 | 2 |
| IPI:IPI00792575.2 | 362 | 42.1  | 10.32 | cDNA FLJ52308                                                                                                                                       |  |  | 23.39 | 2 |
| IPI:IPI00909911.1 | 253 | 28.9  | 7.02  | cDNA FLJ52884                                                                                                                                       |  |  | 16.02 | 2 |
| IPI:IPI01012599.1 | 311 | 35.1  | 5.22  | cDNA FLJ53454, highly similar to Interferon-induced protein with tetratricopeptide repeats 3                                                        |  |  | 15.65 | 2 |
| IPI:IPI00910248.1 | 248 | 27.4  | 8.05  | cDNA FLJ53708, highly similar to Retinol dehydrogenase 11                                                                                           |  |  | 12.60 | 2 |
| IPI:IPI00908843.1 | 434 | 50.5  | 7.75  | cDNA FLJ53857, highly similar to Interferon-induced protein with tetratricopeptide repeats 5                                                        |  |  | 22.82 | 2 |
| IPI:IPI00872684.2 | 554 | 65.5  | 5.91  | cDNA FLJ54141, highly similar to Ezrin                                                                                                              |  |  | 14.14 | 2 |
| IPI:IPI00923551.1 | 599 | 68.5  | 6.13  | cDNA FLJ54318, highly similar to Complement C1r subcomponent                                                                                        |  |  | 19.92 | 2 |
| IPI:IPI00910690.1 | 298 | 33.9  | 8.00  | cDNA FLJ54603, moderately similar to Homo sapiens leucine rich repeat containing 28 (LRR28), mRNA                                                   |  |  | 11.13 | 2 |
| IPI:IPI00909720.1 | 376 | 42.4  | 9.55  | cDNA FLJ54694, highly similar to Pleckstrin and Sec7 domain-containing protein3                                                                     |  |  | 13.16 | 2 |

|                   |      |       |       |                                                                                                             |  |  |       |   |
|-------------------|------|-------|-------|-------------------------------------------------------------------------------------------------------------|--|--|-------|---|
| IPI:IPI00909238.1 | 179  | 20.5  | 11.19 | cDNA FLJ55068, highly similar to Glial fibrillary acidic protein, astrocyte                                 |  |  | 13.26 | 2 |
| IPI:IPI00909987.1 | 373  | 43.2  | 9.06  | cDNA FLJ55620, highly similar to Kinesin-like protein KIF3B                                                 |  |  | 23.90 | 2 |
| IPI:IPI00640187.4 | 1361 | 150.2 | 8.85  | cDNA FLJ56363                                                                                               |  |  | 33.04 | 3 |
| IPI:IPI00909845.2 | 492  | 55.5  | 9.19  | cDNA FLJ56409, highly similar to Serine/threonine-protein kinase Chk1                                       |  |  | 21.58 | 3 |
| IPI:IPI00909600.1 | 972  | 111.2 | 4.74  | cDNA FLJ56563, highly similar to Golgin subfamily B member 1 (Fragment)                                     |  |  | 29.47 | 2 |
| IPI:IPI00909639.1 | 162  | 18.9  | 9.95  | cDNA FLJ56585, highly similar to Homo sapiens sodium channel modifier 1 (SCNM1), transcript variant 1, mRNA |  |  | 7.24  | 2 |
| IPI:IPI00909472.1 | 639  | 70.5  | 7.62  | cDNA FLJ56792, highly similar to Leucine-rich repeat and fibronectin type-III domain-containing protein 5   |  |  | 13.12 | 2 |
| IPI:IPI00909702.2 | 398  | 44.1  | 6.55  | cDNA FLJ57173, highly similar to Phospholipid transfer protein                                              |  |  | 42.85 | 2 |
| IPI:IPI01009807.1 | 206  | 22.7  | 4.72  | cDNA FLJ57273, highly similar to Alpha- and gamma-adaptin-binding protein p34                               |  |  | 28.29 | 2 |
| IPI:IPI00470722.2 | 400  | 44.1  | 7.49  | cDNA FLJ57480, moderately similar to Platelet endothelial cell adhesion molecule                            |  |  | 13.36 | 2 |
| IPI:IPI00966910.1 | 778  | 91.5  | 5.78  | cDNA FLJ57581                                                                                               |  |  | 53.87 | 2 |
| IPI:IPI00909684.1 | 267  | 29.9  | 9.29  | cDNA FLJ57602, highly similar to Creatine kinase M-type                                                     |  |  | 9.89  | 2 |
| IPI:IPI00982009.2 | 679  | 75.2  | 6.57  | cDNA FLJ57955, highly similar to Adapter-related protein complex 2 alpha-2 subunit                          |  |  | 14.65 | 2 |
| IPI:IPI00909890.1 | 429  | 44.8  | 9.00  | cDNA FLJ58049, highly similar to RNA-binding protein FUS                                                    |  |  | 15.23 | 2 |
| IPI:IPI00965073.1 | 1193 | 131.9 | 6.96  | cDNA FLJ58150, highly similar to Centaurin-delta 3                                                          |  |  | 14.16 | 2 |
| IPI:IPI01015484.1 | 840  | 96.2  | 6.89  | cDNA FLJ58368, highly similar to Rap guanine nucleotide exchange factor 4                                   |  |  | 51.62 | 2 |
| IPI:IPI00965964.2 | 1130 | 129.1 | 7.78  | cDNA FLJ58466, highly similar to Leucyl-tRNA synthetase, cytoplasmic                                        |  |  | 41.48 | 3 |
| IPI:IPI00910994.1 | 549  | 60.8  | 4.86  | cDNA FLJ58480, highly similar to Protocadherin beta 14                                                      |  |  | 30.47 | 3 |
| IPI:IPI00909508.1 | 251  | 26.9  | 11.81 | cDNA FLJ58921                                                                                               |  |  | 18.34 | 2 |
| IPI:IPI01009889.1 | 634  | 71.7  | 6.20  | cDNA FLJ59371, highly similar to Exportin-2                                                                 |  |  | 22.01 | 2 |
| IPI:IPI00917968.2 | 543  | 62.3  | 8.13  | cDNA FLJ59496, highly similar to Beta-chimaerin                                                             |  |  | 36.85 | 2 |
| IPI:IPI00290307.4 | 385  | 42.7  | 8.38  | cDNA FLJ59723, highly similar to Tribbles homolog 3                                                         |  |  | 26.85 | 2 |
| IPI:IPI00023532.9 | 588  | 65.1  | 9.66  | cDNA FLJ59751, weakly similar to Mus musculus spermatogenesis associated, serine-rich 2 (Spats2), mRNA      |  |  | 30.20 | 2 |

|                   |      |       |       |                                                                                                                                                         |  |  |       |   |
|-------------------|------|-------|-------|---------------------------------------------------------------------------------------------------------------------------------------------------------|--|--|-------|---|
| IPI:IPI00922687.1 | 736  | 81.3  | 6.01  | cDNA FLJ59769, highly similar to Homo sapiens pleckstrin homology domain containing, family G (with RhoGef domain) member 5, transcript variant 1, mRNA |  |  | 12.29 | 2 |
| IPI:IPI01014329.1 | 819  | 94.1  | 5.01  | cDNA FLJ60304, highly similar to Rab GTPase-binding effector protein 1                                                                                  |  |  | 36.11 | 3 |
| IPI:IPI00926778.2 | 465  | 53.2  | 8.66  | cDNA FLJ60318, highly similar to RNA-binding protein 6                                                                                                  |  |  | 62.76 | 2 |
| IPI:IPI01015251.1 | 949  | 99.3  | 5.31  | cDNA FLJ60962, highly similar to Homo sapiens retrotransposon gag domain containing 1 (RGAG1), mRNA                                                     |  |  | 15.82 | 2 |
| IPI:IPI00908420.2 | 544  | 60.9  | 6.64  | cDNA FLJ60989, highly similar to Bardet-Biedl syndrome 5 protein                                                                                        |  |  | 10.59 | 2 |
| IPI:IPI01009604.1 | 697  | 78.1  | 7.06  | cDNA FLJ61316                                                                                                                                           |  |  | 22.57 | 3 |
| IPI:IPI00419863.3 | 808  | 90.3  | 8.38  | cDNA FLJ75103, highly similar to Homo sapiens protein tyrosine phosphatase domain containing 1 (PTPDC1), transcript variant 1, mRNA                     |  |  | 36.85 | 2 |
| IPI:IPI01013787.1 | 430  | 48.9  | 6.39  | cDNA PSEC0206 fis, clone HEMBA1002913, weakly similar to                                                                                                |  |  | 14.75 | 2 |
| IPI:IPI00979750.1 | 315  | 34.6  | 7.85  | cDNA, FLJ79127, highly similar to Galactosylgalactosylxylosylprotein 3-beta-glucuronosyltransferase 3                                                   |  |  | 6.43  | 2 |
| IPI:IPI00012322.1 | 762  | 87.4  | 8.47  | cGMP-dependent protein kinase 2                                                                                                                         |  |  | 19.61 | 2 |
| IPI:IPI00879866.1 | 101  | 11.5  | 9.32  | Chibby homolog 1                                                                                                                                        |  |  | 32.46 | 2 |
| IPI:IPI00171540.2 | 524  | 51.4  | 12.41 | Chromosome transmission fidelity protein 8 homolog isoform 2                                                                                            |  |  | 10.63 | 2 |
| IPI:IPI00979180.1 | 389  | 45.1  | 9.41  | coiled-coil domain-containing protein 162-like isoform 2                                                                                                |  |  | 24.55 | 3 |
| IPI:IPI00097490.4 | 740  | 87.1  | 5.38  | Coiled-coil domain-containing protein 164                                                                                                               |  |  | 17.24 | 2 |
| IPI:IPI00477003.2 | 936  | 110.5 | 9.60  | Coiled-coil domain-containing protein KIAA1407                                                                                                          |  |  | 37.44 | 2 |
| IPI:IPI00018279.8 | 1745 | 172.0 | 6.87  | Collagen alpha-3(V) chain                                                                                                                               |  |  | 9.36  | 2 |
| IPI:IPI00921156.1 | 123  | 13.4  | 10.59 | Conserved hypothetical protein                                                                                                                          |  |  | 17.59 | 2 |
| IPI:IPI00983780.1 | 85   | 9.4   | 7.91  | Conserved hypothetical protein                                                                                                                          |  |  | 27.40 | 2 |
| IPI:IPI00982053.1 | 369  | 40.7  | 12.04 | Conserved hypothetical protein                                                                                                                          |  |  | 19.15 | 2 |
| IPI:IPI00980051.1 | 109  | 11.4  | 10.80 | Conserved hypothetical protein                                                                                                                          |  |  | 5.96  | 2 |
| IPI:IPI00419507.5 | 170  | 19.6  | 8.02  | Conserved hypothetical protein                                                                                                                          |  |  | 15.52 | 2 |
| IPI:IPI00985472.1 | 78   | 9.3   | 10.07 | Conserved hypothetical protein                                                                                                                          |  |  | 12.63 | 2 |
| IPI:IPI00219249.4 | 1384 | 156.2 | 7.05  | Contactin-associated protein 1                                                                                                                          |  |  | 30.83 | 2 |
| IPI:IPI00970962.1 | 1266 | 135.1 | 8.10  | Crm, cramped-like                                                                                                                                       |  |  | 20.40 | 2 |
| IPI:IPI00167918.2 | 436  | 50.2  | 9.07  | Cyclic nucleotide-binding domain-containing protein 1                                                                                                   |  |  | 18.83 | 3 |
| IPI:IPI00399234.3 | 664  | 76.0  | 6.24  | Cyclic nucleotide-gated olfactory channel                                                                                                               |  |  | 18.48 | 2 |
| IPI:IPI00879221.1 | 421  | 47.5  | 5.53  | cyclin-A1 isoform c                                                                                                                                     |  |  | 12.67 | 2 |

|                   |      |       |       |                                                                         |  |  |        |   |
|-------------------|------|-------|-------|-------------------------------------------------------------------------|--|--|--------|---|
| IPI:IPI00746301.2 | 1030 | 115.5 | 9.54  | Cyclin-dependent kinase-like 5                                          |  |  | 39.14  | 3 |
| IPI:IPI00020039.5 | 651  | 74.2  | 9.67  | Cylicin-1                                                               |  |  | 16.02  | 2 |
| IPI:IPI01018126.1 | 388  | 44.3  | 8.37  | cytochrome P450 2C8 isoform c                                           |  |  | 100.63 | 2 |
| IPI:IPI00787865.3 | 996  | 105.5 | 7.88  | cytoplasmic polyadenylation element-binding protein 2 isoform A         |  |  | 21.82  | 2 |
| IPI:IPI00294728.2 | 3027 | 337.6 | 6.34  | DmX-like protein 1                                                      |  |  | 28.75  | 2 |
| IPI:IPI00018281.1 | 910  | 102.9 | 8.12  | DNA repair and recombination protein RAD54B                             |  |  | 25.40  | 2 |
| IPI:IPI00293921.4 | 1522 | 170.6 | 6.96  | DNA topoisomerase 2-binding protein 1                                   |  |  | 36.45  | 2 |
| IPI:IPI00916060.1 | 1659 | 187.7 | 7.39  | DNA-directed RNA polymerase                                             |  |  | 58.12  | 4 |
| IPI:IPI01013053.1 | 924  | 104.4 | 7.05  | DNA-directed RNA polymerase                                             |  |  | 52.71  | 2 |
| IPI:IPI00798000.1 | 461  | 52.3  | 8.65  | dual specificity protein phosphatase CDC14B isoform 3                   |  |  | 51.90  | 2 |
| IPI:IPI00152653.3 | 4624 | 528.7 | 6.10  | Dynein heavy chain 5, axonemal                                          |  |  | 66.82  | 3 |
| IPI:IPI00005826.2 | 4834 | 526.9 | 6.28  | E3 ubiquitin-protein ligase HERC2                                       |  |  | 68.58  | 2 |
| IPI:IPI00024579.2 | 495  | 56.2  | 7.58  | E3 ubiquitin-protein ligase RAD18                                       |  |  | 23.89  | 2 |
| IPI:IPI00978711.1 | 681  | 78.6  | 5.82  | E3 ubiquitin-protein ligase RNF103 isoform 2                            |  |  | 9.66   | 2 |
| IPI:IPI00921564.1 | 490  | 56.0  | 9.41  | EF-hand calcium-binding domain-containing protein 3 isoform a           |  |  | 55.64  | 3 |
| IPI:IPI00984945.1 | 317  | 36.2  | 8.92  | EF-Hand type domain containing protein                                  |  |  | 70.15  | 2 |
| IPI:IPI00290614.8 | 297  | 32.6  | 9.50  | Endonuclease G, mitochondrial                                           |  |  | 4.59   | 2 |
| IPI:IPI00023711.2 | 2033 | 231.5 | 6.96  | Envoplakin                                                              |  |  | 58.46  | 4 |
| IPI:IPI00916323.3 | 935  | 104.4 | 7.05  | Ephrin receptor                                                         |  |  | 25.21  | 2 |
| IPI:IPI00247492.7 | 904  | 104.8 | 8.40  | Epithelial cell-transforming sequence 2 oncogene-like                   |  |  | 41.20  | 3 |
| IPI:IPI00968296.1 | 404  | 45.4  | 5.57  | Eukaryotic translation termination factor 1, isoform CRA b              |  |  | 14.57  | 2 |
| IPI:IPI00028264.3 | 725  | 81.7  | 5.49  | Exocyst complex component 8                                             |  |  | 19.85  | 2 |
| IPI:IPI01014004.1 | 2022 | 229.1 | 6.04  | FANCM protein                                                           |  |  | 72.47  | 4 |
| IPI:IPI00552091.5 | 972  | 106.9 | 8.18  | F-box protein 10                                                        |  |  | 33.62  | 3 |
| IPI:IPI00397801.4 | 2391 | 247.9 | 8.31  | Filaggrin-2                                                             |  |  | 20.19  | 2 |
| IPI:IPI00922081.1 | 287  | 31.1  | 7.08  | Fructose-bisphosphate aldolase                                          |  |  | 26.36  | 2 |
| IPI:IPI00383468.2 | 441  | 45.4  | 10.07 | GATA-4 transcription factor                                             |  |  | 55.45  | 2 |
| IPI:IPI00646850.1 | 872  | 98.7  | 7.17  | Glutamate/kainate receptor subtype GluR7                                |  |  | 12.28  | 2 |
| IPI:IPI00296219.4 | 602  | 66.3  | 7.30  | Glutaminase liver isoform, mitochondrial                                |  |  | 12.43  | 2 |
| IPI:IPI00976337.1 | 650  | 72.9  | 6.43  | Golgin subfamily A member 8-like protein 1-like                         |  |  | 25.41  | 3 |
| IPI:IPI00640649.1 | 718  | 82.3  | 5.90  | HCG1811050, isoform CRA_b                                               |  |  | 22.02  | 5 |
| IPI:IPI00464999.2 | 1181 | 128.7 | 7.03  | HEAT repeat-containing protein 6                                        |  |  | 43.99  | 2 |
| IPI:IPI00294787.5 | 1467 | 162.7 | 6.09  | Helicase ARIP4                                                          |  |  | 20.07  | 2 |
| IPI:IPI00910614.1 | 532  | 59.6  | 9.16  | heterogeneous nuclear ribonucleoprotein R isoform 4                     |  |  | 11.19  | 2 |
| IPI:IPI00979570.1 | 385  | 43.3  | 6.84  | HLA class I histocompatibility antigen, A-69 alpha chain-like isoform 7 |  |  | 13.22  | 2 |

|                    |      |       |      |                                                                                 |  |  |        |   |
|--------------------|------|-------|------|---------------------------------------------------------------------------------|--|--|--------|---|
| IPI:IPI00005172.1  | 255  | 28.0  | 4.88 | HLA class II histocompatibility antigen, DQ alpha 2 chain                       |  |  | 12.91  | 2 |
| IPI:IPI00945760.1  | 466  | 52.4  | 7.88 | hydroxymethylglutaryl-CoA synthase, mitochondrial isoform 2 precursor           |  |  | 6.17   | 2 |
| IPI:IPI00401026.8  | 2970 | 330.4 | 5.20 | hypothetical protein LOC131544                                                  |  |  | 54.73  | 2 |
| IPI:IPI00926022.1  | 417  | 48.1  | 9.10 | hypothetical protein LOC23366 isoform 5                                         |  |  | 22.89  | 2 |
| IPI:IPI00985373.1  | 723  | 90.5  | 5.14 | hypothetical protein LOC440233 isoform 2                                        |  |  | 40.27  | 4 |
| IPI:IPI00387109.1  | 113  | 12.7  | 7.94 | Ig kappa chain V-II region FR                                                   |  |  | 10.26  | 2 |
| IPI:IPI00387119.1  | 109  | 11.9  | 8.94 | Ig kappa chain V-III region POM                                                 |  |  | 17.83  | 2 |
| IPI:IPI00385254.1  | 109  | 11.7  | 6.54 | Ig lambda chain V-I region WAH                                                  |  |  | 19.39  | 2 |
| IPI:IPI00019471.1  | 1242 | 131.5 | 8.54 | Insulin receptor substrate 1                                                    |  |  | 16.43  | 2 |
| IPI:IPI00294949.3  | 213  | 24.8  | 9.67 | Insulin-like peptide INSL6                                                      |  |  | 73.43  | 2 |
| IPI:IPI00329100.1  | 208  | 24.4  | 8.57 | Interferon epsilon                                                              |  |  | 23.18  | 2 |
| IPI:IPI00936057.2  | 185  | 20.0  | 8.72 | IQ motif and SEC7 domain-containing protein 3-like                              |  |  | 14.72  | 2 |
| IPI:IPI00027223.2  | 414  | 46.6  | 7.01 | Isocitrate dehydrogenase [NADP] cytoplasmic                                     |  |  | 13.51  | 2 |
| IPI:IPI00002245.4  | 686  | 74.7  | 8.63 | Isoform 1 of Acyl-CoA synthetase short-chain family member 3, mitochondrial     |  |  | 4.84   | 2 |
| IPI:IPI00002606.5  | 715  | 80.4  | 5.71 | Isoform 1 of Adseverin                                                          |  |  | 22.90  | 2 |
| IPI:IPI00889046.2  | 1778 | 199.6 | 7.83 | Isoform 1 of Ankyrin repeat domain-containing protein 36C                       |  |  | 34.48  | 2 |
| IPI:IPI00872133.1  | 476  | 54.3  | 8.41 | Isoform 1 of Calcium uptake protein 1, mitochondrial                            |  |  | 12.40  | 2 |
| IPI:IPI00550987.2  | 1140 | 133.4 | 6.21 | Isoform 1 of Centrosomal protein of 135 kDa                                     |  |  | 22.33  | 2 |
| IPI:IPI00150881.3  | 805  | 91.8  | 6.33 | Isoform 1 of Coiled-coil domain-containing protein C6orf204                     |  |  | 27.29  | 2 |
| IPI:IPI00292445.7  | 656  | 75.7  | 8.24 | Isoform 1 of CpG-binding protein                                                |  |  | 5.58   | 2 |
| IPI:IPI00791537.3  | 1236 | 135.2 | 5.68 | Isoform 1 of Cullin-associated NEDD8-dissociated protein 2                      |  |  | 39.04  | 2 |
| IPI:IPI00470607.3  | 584  | 66.2  | 7.74 | Isoform 1 of Dentin matrix protein 4                                            |  |  | 15.50  | 2 |
| IPI:IPI00031519.4  | 1616 | 183.0 | 7.75 | Isoform 1 of DNA (cytosine-5)-methyltransferase 1                               |  |  | 22.95  | 3 |
| IPI:IPI00477535.6  | 1186 | 133.0 | 5.22 | Isoform 1 of DNA repair protein complementing XP-G cells                        |  |  | 15.97  | 2 |
| IPI:IPI00784869.5  | 4471 | 514.5 | 5.88 | Isoform 1 of Dynein heavy chain 10, axonemal                                    |  |  | 101.84 | 2 |
| IPI:IPI00414315.10 | 715  | 80.6  | 6.84 | Isoform 1 of Epidermal growth factor receptor kinase substrate 8-like protein 2 |  |  | 36.25  | 2 |
| IPI:IPI00163516.4  | 1100 | 121.8 | 5.72 | Isoform 1 of Formin-like protein 1                                              |  |  | 25.80  | 2 |
| IPI:IPI00218823.4  | 2715 | 293.3 | 8.22 | Isoform 1 of Histone-lysine N-methyltransferase MLL4                            |  |  | 39.06  | 2 |
| IPI:IPI00307733.6  | 2564 | 287.4 | 6.14 | Isoform 1 of Histone-lysine N-methyltransferase SETD2                           |  |  | 50.57  | 4 |



|                   |      |       |       |                                                                      |  |  |        |   |
|-------------------|------|-------|-------|----------------------------------------------------------------------|--|--|--------|---|
| IPI:IPI00174775.2 | 540  | 58.9  | 7.23  | Isoform 1 of Keratin, type II cytoskeletal 73                        |  |  | 58.40  | 5 |
| IPI:IPI00477227.3 | 520  | 56.8  | 6.02  | Isoform 1 of Keratin, type II cytoskeletal 78                        |  |  | 37.26  | 4 |
| IPI:IPI00328753.1 | 1357 | 156.2 | 5.64  | Isoform 1 of Kinectin                                                |  |  | 66.73  | 3 |
| IPI:IPI00409638.3 | 995  | 107.3 | 5.27  | Isoform 1 of KN motif and ankyrin repeat domain-containing protein 4 |  |  | 18.89  | 2 |
| IPI:IPI01009573.1 | 1947 | 221.8 | 5.38  | Isoform 1 of Lipoxigenase homology domain-containing protein 1       |  |  | 45.24  | 3 |
| IPI:IPI00783294.2 | 1494 | 159.8 | 8.98  | Isoform 1 of Methyl-CpG-binding domain protein 5                     |  |  | 18.40  | 2 |
| IPI:IPI00180781.4 | 471  | 54.4  | 8.82  | Isoform 1 of Mixed lineage kinase domain-like protein                |  |  | 8.99   | 3 |
| IPI:IPI00745746.2 | 2839 | 301.5 | 7.43  | Isoform 1 of PDZ domain-containing protein 2                         |  |  | 61.99  | 2 |
| IPI:IPI00329589.2 | 511  | 57.8  | 6.18  | Isoform 1 of PR domain-containing protein 11                         |  |  | 8.02   | 2 |
| IPI:IPI00178185.1 | 824  | 93.5  | 5.44  | Isoform 1 of Protein bicaudal D homolog 2                            |  |  | 21.93  | 2 |
| IPI:IPI00783563.2 | 559  | 64.9  | 8.60  | Isoform 1 of Protein FAM55B                                          |  |  | 20.02  | 2 |
| IPI:IPI00400986.7 | 2601 | 295.0 | 6.00  | Isoform 1 of Protein KIAA1731                                        |  |  | 54.08  | 2 |
| IPI:IPI00168885.5 | 1386 | 155.5 | 7.71  | Isoform 1 of Putative ATP-dependent RNA helicase DHX57               |  |  | 21.09  | 3 |
| IPI:IPI00871452.1 | 755  | 81.9  | 9.00  | Isoform 1 of PWWP domain-containing protein 2A                       |  |  | 33.84  | 4 |
| IPI:IPI00289188.3 | 401  | 44.2  | 5.59  | Isoform 1 of Rab-interacting lysosomal protein                       |  |  | 34.78  | 2 |
| IPI:IPI00329591.3 | 449  | 51.6  | 8.69  | Isoform 1 of Required for meiotic nuclear division protein 1 homolog |  |  | 33.39  | 2 |
| IPI:IPI00220967.1 | 1407 | 152.1 | 8.66  | Isoform 1 of Ribosome-binding protein 1                              |  |  | 61.78  | 2 |
| IPI:IPI00470806.4 | 897  | 102.0 | 6.96  | Isoform 1 of Schlafen family member 13                               |  |  | 23.01  | 2 |
| IPI:IPI00002232.2 | 1001 | 116.0 | 7.65  | Isoform 1 of Serine/threonine-protein kinase TAO1                    |  |  | 59.08  | 2 |
| IPI:IPI00552528.3 | 342  | 36.9  | 5.66  | Isoform 1 of Signal-regulatory protein beta-2                        |  |  | 7.34   | 2 |
| IPI:IPI00020542.3 | 550  | 59.9  | 8.62  | Isoform 1 of Solute carrier family 22 member 11                      |  |  | 53.27  | 2 |
| IPI:IPI00165995.6 | 805  | 92.5  | 10.02 | Isoform 1 of Splicing factor, arginine/serine-rich 18                |  |  | 38.13  | 2 |
| IPI:IPI00023344.2 | 1274 | 141.1 | 6.13  | Isoform 1 of Symplekin                                               |  |  | 105.32 | 2 |
| IPI:IPI00024214.1 | 500  | 55.5  | 9.17  | Isoform 1 of Telomeric repeat-binding factor 2                       |  |  | 12.23  | 2 |
| IPI:IPI00289861.4 | 1644 | 185.0 | 7.97  | Isoform 1 of Terminal uridylyltransferase 4                          |  |  | 46.23  | 2 |
| IPI:IPI00761041.1 | 1127 | 125.2 | 6.01  | Isoform 1 of Testis-expressed sequence 2 protein                     |  |  | 26.23  | 2 |
| IPI:IPI00305374.5 | 657  | 75.6  | 4.98  | Isoform 1 of THO complex subunit 1                                   |  |  | 17.78  | 2 |
| IPI:IPI00018381.1 | 1013 | 114.6 | 6.02  | Isoform 1 of Tolloid-like protein 1                                  |  |  | 49.85  | 4 |

|                   |      |       |      |                                                                                               |  |  |       |   |
|-------------------|------|-------|------|-----------------------------------------------------------------------------------------------|--|--|-------|---|
| IPI:IPI00167051.3 | 288  | 34.2  | 6.05 | Isoform 1 of Transmembrane and coiled-coil domain-containing protein 5A                       |  |  | 8.50  | 2 |
| IPI:IPI00030572.5 | 1690 | 175.9 | 6.96 | Isoform 1 of Trinucleotide repeat-containing gene 6C protein                                  |  |  | 38.77 | 2 |
| IPI:IPI00607723.1 | 1036 | 115.6 | 6.65 | Isoform 1 of UDP-N-acetylglucosamine--peptide N-acetylglucosaminyltransferase 110 kDa subunit |  |  | 54.47 | 2 |
| IPI:IPI00479789.2 | 769  | 84.5  | 9.72 | Isoform 1 of Uncharacterized protein C1orf103                                                 |  |  | 27.66 | 3 |
| IPI:IPI00464950.2 | 728  | 82.0  | 8.38 | Isoform 1 of Uncharacterized protein C1orf168                                                 |  |  | 29.87 | 2 |
| IPI:IPI00177820.4 | 920  | 101.1 | 6.95 | Isoform 1 of Urea transporter 2                                                               |  |  | 6.67  | 2 |
| IPI:IPI00879625.1 | 236  | 25.8  | 8.27 | Isoform 1 of V-set and transmembrane domain-containing protein 2A                             |  |  | 7.08  | 2 |
| IPI:IPI00969184.1 | 1250 | 144.9 | 5.80 | Isoform 1 of WD repeat-containing protein 65                                                  |  |  | 45.33 | 2 |
| IPI:IPI00103772.1 | 949  | 100.0 | 8.18 | Isoform 1 of Zinc finger CCHC domain-containing protein 14                                    |  |  | 23.23 | 2 |
| IPI:IPI00783879.2 | 2718 | 296.7 | 7.84 | Isoform 1 of Zinc finger protein 40                                                           |  |  | 52.21 | 2 |
| IPI:IPI00852632.2 | 2506 | 284.5 | 7.58 | Isoform 1 of Zinc finger protein 462                                                          |  |  | 28.18 | 2 |
| IPI:IPI00043403.4 | 729  | 81.9  | 8.40 | Isoform 1 of Zinc finger protein 778                                                          |  |  | 37.00 | 2 |
| IPI:IPI00884448.1 | 1169 | 131.6 | 7.23 | Isoform 1 of Zinc finger protein 862                                                          |  |  | 23.04 | 2 |
| IPI:IPI00455176.1 | 660  | 73.9  | 7.52 | Isoform 12 of Basic fibroblast growth factor receptor 1                                       |  |  | 77.23 | 2 |
| IPI:IPI00376206.3 | 300  | 33.6  | 8.98 | Isoform 2 of 17-beta-hydroxysteroid dehydrogenase 13                                          |  |  | 34.62 | 3 |
| IPI:IPI00411930.7 | 1082 | 119.7 | 8.53 | Isoform 2 of A disintegrin and metalloproteinase with thrombospondin motifs 18                |  |  | 53.87 | 2 |
| IPI:IPI00455138.3 | 814  | 90.8  | 5.29 | Isoform 2 of Actin filament-associated protein 1-like 2                                       |  |  | 21.78 | 2 |
| IPI:IPI00642759.2 | 582  | 65.5  | 6.29 | Isoform 2 of Actin-binding protein IPP                                                        |  |  | 28.99 | 2 |
| IPI:IPI00884099.2 | 701  | 79.5  | 5.73 | Isoform 2 of Aminopeptidase Q                                                                 |  |  | 21.61 | 2 |
| IPI:IPI00221392.1 | 343  | 38.4  | 7.23 | Isoform 2 of Carbonic anhydrase 12                                                            |  |  | 8.47  | 2 |
| IPI:IPI00478736.2 | 991  | 111.2 | 8.31 | Isoform 2 of Centrosomal protein CP110                                                        |  |  | 41.81 | 3 |
| IPI:IPI00853635.2 | 876  | 101.5 | 6.58 | Isoform 2 of Centrosome and spindle pole-associated protein 1                                 |  |  | 12.44 | 2 |
| IPI:IPI00556059.1 | 1127 | 128.4 | 6.16 | Isoform 2 of Chromosome-associated kinesin KIF4A                                              |  |  | 35.35 | 2 |
| IPI:IPI00784583.1 | 796  | 92.5  | 6.40 | Isoform 2 of Coiled-coil domain-containing protein 110                                        |  |  | 42.06 | 3 |
| IPI:IPI00065153.3 | 463  | 50.3  | 5.34 | Isoform 2 of Coiled-coil domain-containing protein 114                                        |  |  | 8.66  | 2 |
| IPI:IPI00472887.3 | 1972 | 218.4 | 8.06 | Isoform 2 of Cytoskeleton-associated protein 5                                                |  |  | 38.18 | 3 |

|                   |      |       |      |                                                                          |  |  |       |   |
|-------------------|------|-------|------|--------------------------------------------------------------------------|--|--|-------|---|
| IPI:IPI01012860.1 | 2068 | 236.3 | 7.31 | Isoform 2 of Dedicator of cytokinesis protein 9                          |  |  | 59.06 | 5 |
| IPI:IPI00337801.1 | 1068 | 122.2 | 7.23 | Isoform 2 of Disheveled-associated activator of morphogenesis 1          |  |  | 34.89 | 2 |
| IPI:IPI00514780.5 | 1579 | 176.9 | 6.93 | Isoform 2 of Disks large homolog 5                                       |  |  | 26.90 | 3 |
| IPI:IPI00289113.4 | 696  | 80.4  | 6.00 | Isoform 2 of E3 ubiquitin-protein ligase LRSAM1                          |  |  | 41.76 | 2 |
| IPI:IPI00969571.1 | 398  | 45.0  | 6.70 | Isoform 2 of E3 ubiquitin-protein ligase TRIM21                          |  |  | 12.86 | 2 |
| IPI:IPI00456685.3 | 1621 | 183.6 | 6.42 | Isoform 2 of Eukaryotic translation initiation factor 2-alpha kinase 4   |  |  | 38.03 | 3 |
| IPI:IPI00782985.1 | 869  | 98.1  | 6.99 | Isoform 2 of Eukaryotic translation initiation factor 4 gamma 2          |  |  | 29.93 | 2 |
| IPI:IPI00029717.1 | 644  | 69.7  | 8.06 | Isoform 2 of Fibrinogen alpha chain                                      |  |  | 21.74 | 3 |
| IPI:IPI00477324.3 | 1133 | 130.1 | 6.61 | Isoform 2 of Filamin A-interacting protein 1-like                        |  |  | 21.27 | 3 |
| IPI:IPI00873498.1 | 1318 | 134.1 | 9.23 | Isoform 2 of Glioma tumor suppressor candidate region gene 1 protein     |  |  | 13.61 | 2 |
| IPI:IPI00456373.2 | 421  | 46.1  | 5.35 | Isoform 2 of Homeobox protein Meis3                                      |  |  | 18.78 | 2 |
| IPI:IPI00792971.2 | 288  | 31.4  | 6.24 | Isoform 2 of Isocitrate dehydrogenase [NAD] subunit alpha, mitochondrial |  |  | 22.62 | 2 |
| IPI:IPI00394852.2 | 388  | 42.8  | 7.85 | Isoform 2 of LanC-like protein 3                                         |  |  | 9.75  | 2 |
| IPI:IPI00411690.1 | 1019 | 116.4 | 9.09 | Isoform 2 of La-related protein 1                                        |  |  | 33.28 | 2 |
| IPI:IPI00409742.2 | 1753 | 196.7 | 5.22 | Isoform 2 of NEDD4-binding protein 2                                     |  |  | 32.59 | 2 |
| IPI:IPI00856073.1 | 655  | 76.0  | 6.25 | Isoform 2 of NEDD4-binding protein 2-like 2                              |  |  | 30.00 | 2 |
| IPI:IPI00385001.4 | 1638 | 182.2 | 6.83 | Isoform 2 of Nucleoporin NUP188 homolog                                  |  |  | 22.72 | 2 |
| IPI:IPI00923514.1 | 937  | 105.7 | 9.04 | Isoform 2 of Piwi-like protein 2                                         |  |  | 31.97 | 2 |
| IPI:IPI00909290.1 | 371  | 41.1  | 8.19 | Isoform 2 of Pre-mRNA-splicing factor RBM22                              |  |  | 27.84 | 2 |
| IPI:IPI00943123.2 | 705  | 79.8  | 7.05 | Isoform 2 of Probable E3 ubiquitin-protein ligase MID2                   |  |  | 12.21 | 2 |
| IPI:IPI00643693.1 | 216  | 25.1  | 9.22 | Isoform 2 of Progesterone-induced-blocking factor 1                      |  |  | 21.94 | 2 |
| IPI:IPI00896404.1 | 365  | 40.5  | 8.69 | Isoform 2 of Prospero homeobox protein 2                                 |  |  | 12.52 | 2 |
| IPI:IPI00796463.3 | 2291 | 257.2 | 6.40 | Isoform 2 of Protein dopey-2                                             |  |  | 26.11 | 3 |
| IPI:IPI00443687.2 | 211  | 24.5  | 7.05 | Isoform 2 of Protein GRINL1A                                             |  |  | 28.27 | 2 |
| IPI:IPI00955447.1 | 960  | 106.1 | 9.33 | Isoform 2 of Protein Jumonji                                             |  |  | 31.57 | 2 |
| IPI:IPI00939232.1 | 532  | 59.1  | 9.42 | Isoform 2 of Protein shisa-6 homolog                                     |  |  | 72.50 | 2 |
| IPI:IPI00872423.1 | 1141 | 122.6 | 5.74 | Isoform 2 of Protein very KIND                                           |  |  | 37.41 | 2 |
| IPI:IPI00939198.1 | 625  | 70.7  | 6.19 | Isoform 2 of Receptor-interacting serine/threonine-protein kinase 1      |  |  | 40.21 | 4 |

|                   |      |       |      |                                                                                       |  |  |        |   |
|-------------------|------|-------|------|---------------------------------------------------------------------------------------|--|--|--------|---|
| IPI:IPI00845446.3 | 1391 | 158.2 | 8.59 | Isoform 2 of Sister chromatid cohesion protein PDS5 homolog B                         |  |  | 36.30  | 2 |
| IPI:IPI00645688.2 | 1129 | 129.3 | 7.12 | Isoform 2 of Sodium/hydrogen exchanger 10                                             |  |  | 77.97  | 2 |
| IPI:IPI00413860.4 | 658  | 71.9  | 8.65 | Isoform 2 of Spermatid perinuclear RNA-binding protein                                |  |  | 20.24  | 2 |
| IPI:IPI00641475.1 | 412  | 47.3  | 6.76 | Isoform 2 of Spermatid-associated protein                                             |  |  | 65.74  | 2 |
| IPI:IPI00220583.4 | 419  | 48.2  | 6.62 | Isoform 2 of Telomeric repeat-binding factor 1                                        |  |  | 19.95  | 2 |
| IPI:IPI00786950.1 | 983  | 112.9 | 5.48 | Isoform 2 of Ubiquitin carboxyl-terminal hydrolase 48                                 |  |  | 25.06  | 3 |
| IPI:IPI00619903.3 | 1531 | 174.9 | 5.60 | Isoform 2 of UDP-glucose:glycoprotein glucosyltransferase 1                           |  |  | 22.91  | 2 |
| IPI:IPI00167498.3 | 1229 | 142.2 | 6.79 | Isoform 2 of Uncharacterized protein C9orf93                                          |  |  | 113.12 | 2 |
| IPI:IPI00552287.1 | 204  | 21.8  | 5.20 | Isoform 2 of Vasohibin-1                                                              |  |  | 6.32   | 2 |
| IPI:IPI00410359.4 | 704  | 80.2  | 9.00 | Isoform 2 of Zinc finger protein 62 homolog                                           |  |  | 24.30  | 2 |
| IPI:IPI00900379.1 | 834  | 96.7  | 9.48 | Isoform 2 of Zinc finger protein 808                                                  |  |  | 30.45  | 2 |
| IPI:IPI00073454.2 | 828  | 87.2  | 5.92 | Isoform 2C2A' of Collagen alpha-2(VI) chain                                           |  |  | 15.01  | 2 |
| IPI:IPI00549517.2 | 1044 | 117.3 | 8.78 | Isoform 3 of 5-azacytidine-induced protein 1                                          |  |  | 73.00  | 2 |
| IPI:IPI00187145.1 | 281  | 31.2  | 4.51 | Isoform 3 of CDK5 regulatory subunit-associated protein 3                             |  |  | 9.73   | 2 |
| IPI:IPI00619925.2 | 2580 | 301.6 | 5.57 | Isoform 3 of Centromere-associated protein E                                          |  |  | 121.17 | 6 |
| IPI:IPI00746795.2 | 2882 | 323.9 | 6.92 | Isoform 3 of Chromodomain-helicase-DNA-binding protein 9                              |  |  | 110.92 | 2 |
| IPI:IPI00216274.1 | 322  | 36.7  | 9.23 | Isoform 3 of CMP-N-acetylneuraminate-beta-galactosamide-alpha-2,3-sialyltransferase 4 |  |  | 38.40  | 3 |
| IPI:IPI00178066.6 | 1778 | 197.8 | 6.46 | Isoform 3 of Deleted in lung and esophageal cancer protein 1                          |  |  | 37.17  | 3 |
| IPI:IPI00869161.6 | 730  | 77.0  | 5.24 | Isoform 3 of Fanconi anemia-associated protein of 100 kDa                             |  |  | 11.28  | 2 |
| IPI:IPI00954901.1 | 313  | 36.1  | 8.32 | Isoform 3 of Gamma-aminobutyric acid receptor subunit beta-2                          |  |  | 12.47  | 2 |
| IPI:IPI00333696.6 | 1982 | 214.9 | 7.42 | Isoform 3 of HEAT repeat-containing protein 5B                                        |  |  | 35.54  | 2 |
| IPI:IPI00221241.3 | 1006 | 115.0 | 5.78 | Isoform 3 of Leucyl-cystinyl aminopeptidase                                           |  |  | 23.27  | 2 |
| IPI:IPI00472094.2 | 1823 | 199.0 | 4.91 | Isoform 3 of Microtubule-associated protein 2                                         |  |  | 40.41  | 2 |
| IPI:IPI00883737.2 | 1401 | 152.8 | 5.38 | Isoform 3 of Obscurin-like protein 1                                                  |  |  | 17.11  | 3 |
| IPI:IPI00072541.4 | 376  | 43.3  | 8.63 | Isoform 3 of PCI domain-containing protein 2                                          |  |  | 13.07  | 2 |

|                   |      |       |      |                                                                           |  |  |        |   |
|-------------------|------|-------|------|---------------------------------------------------------------------------|--|--|--------|---|
| IPI:IPI00784922.1 | 558  | 63.8  | 8.10 | Isoform 3 of Peptide-N(4)-(N-acetyl-beta-glucosaminy)l)asparagine amidase |  |  | 14.70  | 2 |
| IPI:IPI00219042.1 | 905  | 100.8 | 6.29 | Isoform 3 of Peptidyl-glycine alpha-amidating monooxygenase               |  |  | 38.68  | 2 |
| IPI:IPI00787604.1 | 868  | 99.4  | 5.94 | Isoform 3 of Poly(ADP-ribose) glycohydrolase                              |  |  | 39.64  | 3 |
| IPI:IPI00412281.1 | 461  | 51.9  | 9.82 | Isoform 3 of Pysin and HIN domain-containing protein 1                    |  |  | 49.44  | 3 |
| IPI:IPI00896497.2 | 1235 | 135.1 | 5.57 | Isoform 3 of Rho guanine nucleotide exchange factor 10-like protein       |  |  | 42.43  | 2 |
| IPI:IPI00719345.1 | 791  | 88.9  | 4.58 | Isoform 3 of Serine/threonine-protein phosphatase 6 regulatory subunit 3  |  |  | 26.14  | 2 |
| IPI:IPI00746112.1 | 496  | 56.0  | 5.87 | Isoform 3 of Synembryn-B                                                  |  |  | 25.07  | 2 |
| IPI:IPI00910439.1 | 530  | 60.8  | 8.98 | Isoform 3 of Uncharacterized protein C17orf66                             |  |  | 36.91  | 2 |
| IPI:IPI00302008.2 | 1660 | 184.0 | 6.98 | Isoform 3 of Zinc finger protein 407                                      |  |  | 36.05  | 2 |
| IPI:IPI00968160.1 | 731  | 81.8  | 7.53 | Isoform 3 of Zinc finger protein 827                                      |  |  | 24.88  | 2 |
| IPI:IPI00025976.3 | 179  | 20.8  | 9.72 | Isoform 4 of Dual serine/threonine and tyrosine protein kinase            |  |  | 5.75   | 2 |
| IPI:IPI00062809.4 | 770  | 86.6  | 8.05 | Isoform 4 of Myosin-XIX                                                   |  |  | 15.36  | 2 |
| IPI:IPI00419950.5 | 1340 | 148.2 | 5.78 | Isoform 4 of Rho guanine nucleotide exchange factor 10                    |  |  | 11.34  | 2 |
| IPI:IPI00909179.1 | 1189 | 135.2 | 5.62 | Isoform 4 of Serine/threonine-protein kinase Nek1                         |  |  | 32.55  | 3 |
| IPI:IPI00396130.6 | 1183 | 127.0 | 9.38 | Isoform 4 of SRC kinase signaling inhibitor 1                             |  |  | 34.85  | 3 |
| IPI:IPI00549688.1 | 330  | 37.3  | 6.80 | Isoform 4 of Target of rapamycin complex 2 subunit MAPKAP1                |  |  | 8.99   | 2 |
| IPI:IPI00926649.1 | 801  | 88.9  | 7.21 | Isoform 4 of Transcription factor SOX-6                                   |  |  | 166.12 | 2 |
| IPI:IPI00953262.1 | 1079 | 121.8 | 5.15 | Isoform 4 of Voltage-dependent calcium channel subunit alpha-2/delta-1    |  |  | 22.06  | 4 |
| IPI:IPI00869114.1 | 1353 | 150.3 | 6.14 | Isoform 5 of Myomegalin                                                   |  |  | 60.83  | 2 |
| IPI:IPI00896467.2 | 1067 | 117.6 | 5.92 | Isoform 5 of Rho guanine nucleotide exchange factor 10-like protein       |  |  | 27.59  | 2 |
| IPI:IPI00915914.1 | 280  | 29.8  | 8.56 | Isoform 5 of Visual system homeobox 1                                     |  |  | 7.78   | 2 |
| IPI:IPI00397554.6 | 2240 | 254.2 | 8.35 | Isoform 7 of Voltage-dependent P/Q-type calcium channel subunit alpha-1A  |  |  | 29.15  | 2 |
| IPI:IPI00807698.1 | 315  | 36.4  | 8.07 | Isoform 8 of Lymphoid-specific helicase                                   |  |  | 32.34  | 2 |
| IPI:IPI00332453.2 | 993  | 111.6 | 7.46 | Isoform A3 of Tight junction protein ZO-2                                 |  |  | 15.72  | 2 |
| IPI:IPI00219710.1 | 906  | 103.4 | 7.58 | Isoform D of Leptin receptor                                              |  |  | 28.62  | 4 |

|                   |      |       |      |                                                                                                    |  |  |       |   |
|-------------------|------|-------|------|----------------------------------------------------------------------------------------------------|--|--|-------|---|
| IPI:IPI00219543.1 | 570  | 66.1  | 7.56 | Isoform Delta-2 of Serine/threonine-protein phosphatase 2A 56 kDa regulatory subunit delta isoform |  |  | 22.90 | 3 |
| IPI:IPI00217573.1 | 617  | 67.1  | 8.95 | Isoform DON-1B of Pro-neuregulin-2, membrane-bound isoform                                         |  |  | 18.35 | 2 |
| IPI:IPI00218648.2 | 1188 | 134.9 | 4.98 | Isoform III of AT-rich interactive domain-containing protein 4A                                    |  |  | 40.20 | 2 |
| IPI:IPI00969544.1 | 1282 | 143.9 | 6.24 | Isoform JM-B CYT-2 of Receptor tyrosine-protein kinase erbB-4                                      |  |  | 49.50 | 3 |
| IPI:IPI00031545.4 | 2701 | 307.9 | 6.43 | Isoform Long of Inositol 1,4,5-trisphosphate receptor type 2                                       |  |  | 86.05 | 2 |
| IPI:IPI00217332.1 | 487  | 53.0  | 8.65 | Isoform PACE4B of Proprotein convertase subtilisin/kexin type 6                                    |  |  | 98.36 | 2 |
| IPI:IPI00418663.3 | 486  | 53.0  | 5.48 | Keratin 25D                                                                                        |  |  | 15.38 | 2 |
| IPI:IPI00297641.2 | 456  | 50.4  | 4.84 | Keratin, type I cuticular Ha8                                                                      |  |  | 22.62 | 2 |
| IPI:IPI00019359.4 | 623  | 62.0  | 5.24 | Keratin, type I cytoskeletal 9                                                                     |  |  | 93.28 | 7 |
| IPI:IPI00376379.4 | 578  | 61.9  | 5.99 | Keratin, type II cytoskeletal 1b                                                                   |  |  | 28.04 | 3 |
| IPI:IPI00008359.2 | 638  | 65.8  | 8.12 | Keratin, type II cytoskeletal 2 oral                                                               |  |  | 61.67 | 5 |
| IPI:IPI00290857.3 | 628  | 64.4  | 6.48 | Keratin, type II cytoskeletal 3                                                                    |  |  | 29.20 | 5 |
| IPI:IPI00293665.9 | 564  | 60.0  | 8.00 | Keratin, type II cytoskeletal 6B                                                                   |  |  | 46.65 | 5 |
| IPI:IPI00329306.3 | 529  | 57.8  | 7.71 | Keratin, type II cytoskeletal 74                                                                   |  |  | 26.19 | 4 |
| IPI:IPI00005859.5 | 551  | 59.5  | 7.74 | Keratin, type II cytoskeletal 75                                                                   |  |  | 49.33 | 5 |
| IPI:IPI00554648.3 | 483  | 53.7  | 5.59 | Keratin, type II cytoskeletal 8                                                                    |  |  | 45.81 | 4 |
| IPI:IPI00017870.1 | 499  | 55.1  | 4.91 | Keratin-8-like protein 1                                                                           |  |  | 35.02 | 2 |
| IPI:IPI00306400.9 | 673  | 73.7  | 8.98 | Kinesin-like protein KIFC1                                                                         |  |  | 30.93 | 2 |
| IPI:IPI00914853.1 | 394  | 44.9  | 5.60 | leucine-rich repeat flightless-interacting protein 1 isoform 2                                     |  |  | 23.74 | 2 |
| IPI:IPI00465126.4 | 708  | 79.4  | 7.83 | Leucine-rich repeat neuronal protein 3                                                             |  |  | 19.78 | 2 |
| IPI:IPI00743133.2 | 55   | 6.7   | 9.41 | Leukemia-associated protein 2                                                                      |  |  | 9.48  | 2 |
| IPI:IPI00177494.2 | 162  | 18.8  | 9.77 | Line-1 reverse transcriptase (Fragment)                                                            |  |  | 26.69 | 3 |
| IPI:IPI00644131.1 | 1010 | 113.5 | 7.28 | lysosomal alpha-mannosidase isoform 2 precursor                                                    |  |  | 22.47 | 2 |
| IPI:IPI00010388.1 | 599  | 65.1  | 4.55 | Major centromere autoantigen B                                                                     |  |  | 34.07 | 2 |
| IPI:IPI00018244.1 | 122  | 13.1  | 9.55 | MCM3-associated gene antisense protein                                                             |  |  | 8.32  | 2 |
| IPI:IPI00879645.1 | 161  | 18.4  | 9.41 | Megakaryoblastic leukemia (Translocation) 1, isoform CRA b                                         |  |  | 5.18  | 2 |
| IPI:IPI00303112.2 | 2136 | 235.2 | 8.24 | Methylcytosine dioxygenase TET1                                                                    |  |  | 31.13 | 2 |
| IPI:IPI00880007.2 | 2297 | 245.3 | 6.23 | Microtubule-associated protein                                                                     |  |  | 48.59 | 2 |
| IPI:IPI00008868.4 | 2468 | 270.5 | 4.81 | Microtubule-associated protein 1B                                                                  |  |  | 47.35 | 2 |
| IPI:IPI00010156.2 | 587  | 65.9  | 5.45 | Mitogen-activated protein kinase 4                                                                 |  |  | 27.20 | 2 |
| IPI:IPI00412433.1 | 1374 | 154.4 | 5.78 | Mitogen-activated protein kinase kinase kinase 5                                                   |  |  | 18.30 | 2 |
| IPI:IPI00219365.3 | 577  | 67.8  | 6.40 | Moesin                                                                                             |  |  | 30.88 | 2 |

|                   |      |       |       |                                                                                |  |  |        |   |
|-------------------|------|-------|-------|--------------------------------------------------------------------------------|--|--|--------|---|
| IPI:IPI00878953.1 | 288  | 32.5  | 7.18  | MRNA for apolipoprotein E                                                      |  |  | 21.05  | 2 |
| IPI:IPI00045914.1 | 3664 | 402.0 | 7.64  | Msx2-interacting protein                                                       |  |  | 100.55 | 2 |
| IPI:IPI00220342.5 | 285  | 31.1  | 5.81  | N(G),N(G)-dimethylarginine dimethylaminohydrolase 1                            |  |  | 4.72   | 2 |
| IPI:IPI00087498.4 | 601  | 68.3  | 9.39  | N-acetyltransferase ESCO2                                                      |  |  | 30.83  | 2 |
| IPI:IPI00328970.1 | 655  | 75.0  | 7.20  | NACHT, LRR and PYD domains-containing protein 10                               |  |  | 19.16  | 2 |
| IPI:IPI00005667.5 | 896  | 100.3 | 5.36  | NEDD4-binding protein 1                                                        |  |  | 16.58  | 2 |
| IPI:IPI00048230.1 | 271  | 31.1  | 8.63  | Neurexophilin-1                                                                |  |  | 9.39   | 2 |
| IPI:IPI00555717.1 | 921  | 105.8 | 4.58  | Neuroblastoma breakpoint family member 14                                      |  |  | 22.84  | 2 |
| IPI:IPI00868727.1 | 540  | 59.4  | 4.75  | neurofilament medium polypeptide isoform 2                                     |  |  | 20.01  | 2 |
| IPI:IPI00936559.1 | 559  | 62.4  | 6.37  | neuron navigator 1-like                                                        |  |  | 38.00  | 2 |
| IPI:IPI00002349.2 | 695  | 76.1  | 8.70  | Nuclear fragile X mental retardation-interacting protein 2                     |  |  | 12.40  | 2 |
| IPI:IPI00010196.1 | 1158 | 126.9 | 8.18  | Nuclear receptor-interacting protein 1                                         |  |  | 49.33  | 3 |
| IPI:IPI00169066.1 | 323  | 36.3  | 9.22  | Olfactory receptor 6T1                                                         |  |  | 15.15  | 2 |
| IPI:IPI00168956.2 | 345  | 38.4  | 8.15  | olfactory receptor 7G2                                                         |  |  | 13.35  | 2 |
| IPI:IPI00294934.2 | 1001 | 109.9 | 6.60  | Par-3 partitioning defective 3 homolog                                         |  |  | 27.74  | 2 |
| IPI:IPI00514708.3 | 250  | 27.7  | 5.54  | Peptidyl-prolyl cis-trans isomerase                                            |  |  | 15.94  | 2 |
| IPI:IPI00291916.6 | 1821 | 206.6 | 8.85  | PH-interacting protein                                                         |  |  | 41.25  | 2 |
| IPI:IPI00292690.1 | 1102 | 126.4 | 7.50  | Phosphatidylinositol-4,5-bisphosphate 3-kinase catalytic subunit gamma isoform |  |  | 60.49  | 2 |
| IPI:IPI00022446.1 | 101  | 10.8  | 8.62  | Platelet factor 4                                                              |  |  | 11.22  | 3 |
| IPI:IPI00917284.1 | 555  | 62.9  | 5.59  | PMS1 nirs variant 4                                                            |  |  | 17.77  | 2 |
| IPI:IPI00375881.1 | 1732 | 195.8 | 8.48  | Polycystic kidney disease protein 1-like 3                                     |  |  | 33.31  | 2 |
| IPI:IPI00218919.7 | 1035 | 114.0 | 5.81  | Potassium-transporting ATPase alpha chain 1                                    |  |  | 8.66   | 2 |
| IPI:IPI00472974.2 | 1481 | 162.0 | 6.84  | PR domain zinc finger protein 2 isoform c                                      |  |  | 24.89  | 2 |
| IPI:IPI00001189.1 | 68   | 7.4   | 10.36 | PRO0823                                                                        |  |  | 4.38   | 2 |
| IPI:IPI00032423.3 | 599  | 67.5  | 9.67  | Probable ATP-dependent RNA helicase DDX52                                      |  |  | 26.65  | 3 |
| IPI:IPI00024229.1 | 507  | 55.6  | 5.73  | Probable E3 ubiquitin-protein ligase makorin-3                                 |  |  | 13.06  | 2 |
| IPI:IPI00017060.2 | 433  | 49.2  | 9.31  | Probable G-protein coupled receptor 22                                         |  |  | 6.38   | 2 |
| IPI:IPI00022048.8 | 879  | 98.5  | 6.61  | Prostaglandin F2 receptor negative regulator                                   |  |  | 35.23  | 3 |
| IPI:IPI00966266.1 | 127  | 15.4  | 9.07  | Protein                                                                        |  |  | 36.24  | 2 |
| IPI:IPI00981534.1 | 537  | 60.4  | 7.91  | Protein                                                                        |  |  | 24.33  | 2 |
| IPI:IPI00945074.1 | 505  | 57.0  | 5.53  | Protein                                                                        |  |  | 27.83  | 2 |
| IPI:IPI00796034.2 | 970  | 111.1 | 6.96  | Protein                                                                        |  |  | 30.65  | 2 |
| IPI:IPI00924950.1 | 122  | 13.9  | 9.85  | Protein                                                                        |  |  | 6.55   | 2 |
| IPI:IPI01011065.1 | 120  | 13.9  | 10.36 | Protein                                                                        |  |  | 40.06  | 2 |
| IPI:IPI00946381.1 | 179  | 20.0  | 5.22  | Protein                                                                        |  |  | 13.29  | 2 |
| IPI:IPI00845457.1 | 1347 | 148.5 | 8.81  | Protein FAM75A1                                                                |  |  | 28.06  | 2 |
| IPI:IPI00647018.3 | 1347 | 148.6 | 8.85  | Protein FAM75A2                                                                |  |  | 29.57  | 2 |
| IPI:IPI00556472.2 | 316  | 36.4  | 8.90  | Protein tyrosine phosphatase, non-receptor type 2, isoform CRA d               |  |  | 10.00  | 2 |

|                   |      |       |      |                                                                               |  |  |       |   |
|-------------------|------|-------|------|-------------------------------------------------------------------------------|--|--|-------|---|
| IPI:IPI00007199.5 | 444  | 50.7  | 8.27 | Protein Z-dependent protease inhibitor                                        |  |  | 13.84 | 2 |
| IPI:IPI00376483.3 | 766  | 88.1  | 5.62 | Protein zer-1 homolog                                                         |  |  | 13.47 | 2 |
| IPI:IPI00982309.1 | 498  | 56.4  | 7.37 | putative IQ motif and ankyrin repeat domain-containing protein LOC642574-like |  |  | 29.71 | 2 |
| IPI:IPI00455971.3 | 341  | 37.9  | 6.37 | Putative MAGE domain-containing protein MAGEA13P                              |  |  | 13.83 | 2 |
| IPI:IPI00737624.3 | 464  | 49.6  | 9.89 | Putative protein FAM90A18/FAM90A19                                            |  |  | 14.98 | 2 |
| IPI:IPI00796817.2 | 223  | 27.0  | 9.72 | Putative uncharacterized protein DKFZp781D2453                                |  |  | 20.49 | 2 |
| IPI:IPI00335409.1 | 716  | 83.2  | 9.61 | Putative zinc finger protein 840                                              |  |  | 14.06 | 2 |
| IPI:IPI00514622.2 | 1105 | 124.6 | 5.01 | Ran-binding protein 6                                                         |  |  | 26.04 | 3 |
| IPI:IPI00023105.3 | 435  | 50.0  | 5.31 | Ras association domain-containing protein 9                                   |  |  | 14.18 | 2 |
| IPI:IPI00853148.1 | 230  | 25.6  | 7.61 | Regulatory factor X, 5                                                        |  |  | 9.02  | 2 |
| IPI:IPI00455626.2 | 784  | 90.7  | 6.92 | Repetin                                                                       |  |  | 36.83 | 3 |
| IPI:IPI00168399.2 | 569  | 64.7  | 4.75 | Retrotransposon gag domain-containing protein 4                               |  |  | 7.01  | 2 |
| IPI:IPI00290332.2 | 786  | 89.3  | 7.18 | Rho GTPase-activating protein 10                                              |  |  | 44.93 | 2 |
| IPI:IPI00738852.4 | 1052 | 118.0 | 5.72 | RNA-binding protein 44                                                        |  |  | 24.01 | 2 |
| IPI:IPI00924858.1 | 1154 | 130.9 | 6.58 | S phase cyclin A-associated protein in the endoplasmic reticulum isoform b    |  |  | 22.48 | 2 |
| IPI:IPI00828051.2 | 701  | 81.8  | 6.39 | SEC15-like protein 3                                                          |  |  | 20.76 | 2 |
| IPI:IPI00243995.5 | 708  | 81.4  | 8.87 | Serine/threonine-protein kinase Nek5                                          |  |  | 61.38 | 2 |
| IPI:IPI00028974.1 | 314  | 33.9  | 4.59 | SERTA domain-containing protein 2                                             |  |  | 11.24 | 2 |
| IPI:IPI00922456.1 | 374  | 41.6  | 5.97 | SH3-domain GRB2-like endophilin B2                                            |  |  | 13.85 | 2 |
| IPI:IPI00007836.1 | 973  | 111.3 | 7.30 | Short transient receptor potential channel 5                                  |  |  | 14.40 | 2 |
| IPI:IPI00645934.2 | 165  | 17.7  | 8.24 | Similar to Cyclin M3 isoform 2                                                |  |  | 30.88 | 2 |
| IPI:IPI00936444.2 | 5706 | 590.4 | 6.67 | Similar to Mucin-5B precursor                                                 |  |  | 17.18 | 2 |
| IPI:IPI00157837.5 | 599  | 67.5  | 8.92 | Similar to PHD finger protein 19 isoform b                                    |  |  | 19.92 | 2 |
| IPI:IPI00292393.5 | 1836 | 207.9 | 5.10 | Sodium channel protein type 4 subunit alpha                                   |  |  | 24.52 | 2 |
| IPI:IPI00550598.1 | 513  | 54.9  | 5.30 | Solute carrier family 41 member 1                                             |  |  | 4.32  | 2 |
| IPI:IPI00020134.2 | 1332 | 152.9 | 6.84 | Son of sevenless homolog 2                                                    |  |  | 18.42 | 2 |
| IPI:IPI00032831.4 | 258  | 29.0  | 5.81 | Synaptosomal-associated protein 29                                            |  |  | 41.86 | 2 |
| IPI:IPI00219274.4 | 419  | 46.8  | 7.99 | Synaptotagmin-2                                                               |  |  | 13.08 | 2 |
| IPI:IPI00296387.3 | 430  | 49.6  | 5.55 | Tektin-2                                                                      |  |  | 87.04 | 2 |
| IPI:IPI00018769.4 | 1172 | 129.9 | 4.83 | Thrombospondin-1                                                              |  |  | 21.80 | 2 |
| IPI:IPI00043467.4 | 591  | 67.3  | 8.46 | Tigger transposable element-derived protein 1                                 |  |  | 21.24 | 2 |
| IPI:IPI00979947.1 | 555  | 63.2  | 7.34 | transcriptional activator Myb isoform 5                                       |  |  | 16.14 | 2 |
| IPI:IPI00783250.1 | 1722 | 192.0 | 6.49 | TRIP12 protein                                                                |  |  | 57.21 | 2 |
| IPI:IPI00244346.6 | 210  | 24.0  | 9.86 | Troponin I, cardiac muscle                                                    |  |  | 29.95 | 2 |
| IPI:IPI00983009.1 | 491  | 54.7  | 7.87 | tumor protein p73 isoform g                                                   |  |  | 9.66  | 2 |
| IPI:IPI00925754.1 | 885  | 99.7  | 5.45 | Ubiquitin carboxyl-terminal hydrolase                                         |  |  | 20.70 | 2 |



|                   |      |       |       |                                           |  |  |        |   |
|-------------------|------|-------|-------|-------------------------------------------|--|--|--------|---|
| IPI:IPI01009333.1 | 920  | 105.8 | 5.35  | Ubiquitin carboxyl-terminal hydrolase     |  |  | 40.95  | 2 |
| IPI:IPI00185661.5 | 1604 | 181.5 | 6.44  | Ubiquitin carboxyl-terminal hydrolase 32  |  |  | 41.20  | 3 |
| IPI:IPI00893786.2 | 1744 | 196.1 | 8.75  | Uncharacterized protein                   |  |  | 49.83  | 3 |
| IPI:IPI00554533.2 | 466  | 53.2  | 8.66  | Uncharacterized protein                   |  |  | 18.92  | 3 |
| IPI:IPI00442135.2 | 847  | 94.8  | 7.23  | Uncharacterized protein                   |  |  | 28.07  | 3 |
| IPI:IPI00256095.5 | 732  | 82.0  | 6.60  | Uncharacterized protein                   |  |  | 23.33  | 3 |
| IPI:IPI00973723.1 | 1270 | 141.0 | 6.46  | Uncharacterized protein                   |  |  | 32.03  | 3 |
| IPI:IPI00965101.1 | 688  | 78.1  | 6.13  | Uncharacterized protein                   |  |  | 14.59  | 3 |
| IPI:IPI00981458.1 | 197  | 22.8  | 9.50  | Uncharacterized protein                   |  |  | 22.10  | 2 |
| IPI:IPI00981451.1 | 277  | 30.8  | 9.04  | Uncharacterized protein                   |  |  | 14.02  | 2 |
| IPI:IPI00966367.1 | 676  | 75.6  | 8.18  | Uncharacterized protein                   |  |  | 19.83  | 2 |
| IPI:IPI00877648.1 | 891  | 99.3  | 8.56  | Uncharacterized protein                   |  |  | 20.06  | 2 |
| IPI:IPI00964041.1 | 1203 | 137.4 | 7.33  | Uncharacterized protein                   |  |  | 37.36  | 2 |
| IPI:IPI00946535.1 | 130  | 14.4  | 9.13  | Uncharacterized protein                   |  |  | 34.78  | 2 |
| IPI:IPI00927698.1 | 137  | 15.3  | 8.51  | Uncharacterized protein                   |  |  | 12.61  | 2 |
| IPI:IPI00946526.1 | 191  | 21.7  | 9.61  | Uncharacterized protein                   |  |  | 15.10  | 2 |
| IPI:IPI00974499.1 | 245  | 27.2  | 5.94  | Uncharacterized protein                   |  |  | 16.50  | 2 |
| IPI:IPI00101049.4 | 218  | 25.0  | 8.69  | Uncharacterized protein                   |  |  | 6.19   | 2 |
| IPI:IPI00643948.3 | 229  | 24.1  | 9.16  | Uncharacterized protein                   |  |  | 11.22  | 2 |
| IPI:IPI00942353.1 | 669  | 73.8  | 9.67  | Uncharacterized protein                   |  |  | 69.32  | 2 |
| IPI:IPI00642249.1 | 597  | 68.4  | 8.06  | Uncharacterized protein                   |  |  | 23.46  | 2 |
| IPI:IPI00979950.1 | 860  | 95.3  | 8.81  | Uncharacterized protein                   |  |  | 16.02  | 2 |
| IPI:IPI00940678.2 | 565  | 62.5  | 9.39  | Uncharacterized protein                   |  |  | 23.91  | 2 |
| IPI:IPI00967419.1 | 622  | 69.4  | 7.11  | Uncharacterized protein                   |  |  | 21.65  | 2 |
| IPI:IPI00979106.1 | 789  | 88.9  | 6.76  | Uncharacterized protein                   |  |  | 47.81  | 2 |
| IPI:IPI00945220.1 | 668  | 78.7  | 4.74  | Uncharacterized protein                   |  |  | 45.24  | 2 |
| IPI:IPI00981749.1 | 901  | 97.2  | 5.00  | Uncharacterized protein                   |  |  | 44.20  | 2 |
| IPI:IPI00947525.1 | 775  | 86.4  | 4.96  | Uncharacterized protein                   |  |  | 24.21  | 2 |
| IPI:IPI00155855.2 | 977  | 108.2 | 8.87  | Uncharacterized protein                   |  |  | 15.74  | 2 |
| IPI:IPI00983716.1 | 2792 | 308.4 | 5.85  | Uncharacterized protein                   |  |  | 77.15  | 2 |
| IPI:IPI00964700.1 | 95   | 10.7  | 11.84 | Uncharacterized protein                   |  |  | 7.37   | 2 |
| IPI:IPI00973984.1 | 166  | 19.7  | 9.57  | Uncharacterized protein                   |  |  | 7.70   | 2 |
| IPI:IPI00983836.1 | 289  | 31.6  | 5.31  | Uncharacterized protein                   |  |  | 9.48   | 2 |
| IPI:IPI00642427.1 | 273  | 31.8  | 8.35  | Uncharacterized protein                   |  |  | 6.11   | 2 |
| IPI:IPI00984893.1 | 250  | 27.8  | 10.30 | Uncharacterized protein                   |  |  | 11.57  | 2 |
| IPI:IPI00964123.1 | 413  | 45.6  | 6.68  | Uncharacterized protein                   |  |  | 9.18   | 2 |
| IPI:IPI00784236.3 | 630  | 68.7  | 8.73  | Uncharacterized protein                   |  |  | 9.14   | 2 |
| IPI:IPI00981054.1 | 620  | 73.4  | 8.70  | Uncharacterized protein                   |  |  | 30.98  | 2 |
| IPI:IPI00169407.8 | 1168 | 133.1 | 5.54  | Uncharacterized protein                   |  |  | 12.75  | 2 |
| IPI:IPI00739770.3 | 552  | 66.4  | 8.87  | Uncharacterized protein C2orf77           |  |  | 39.73  | 3 |
| IPI:IPI00783612.2 | 329  | 38.5  | 6.96  | Uncharacterized protein C6orf163          |  |  | 142.53 | 2 |
| IPI:IPI00297973.6 | 590  | 68.4  | 7.31  | Uncharacterized protein C7orf31           |  |  | 17.09  | 2 |
| IPI:IPI00401834.5 | 506  | 59.1  | 6.44  | UPF0639 protein                           |  |  | 15.60  | 2 |
| IPI:IPI00973032.1 | 117  | 12.3  | 5.91  | V1-17 protein                             |  |  | 22.91  | 2 |
| IPI:IPI00719366.1 | 196  | 22.7  | 7.20  | V-type proton ATPase subunit E1 isoform c |  |  | 14.18  | 2 |
| IPI:IPI00029107.2 | 1432 | 162.4 | 6.34  | Werner syndrome ATP-dependent helicase    |  |  | 22.20  | 3 |
| IPI:IPI00000388.1 | 711  | 81.6  | 8.66  | Zinc finger protein 175                   |  |  | 8.38   | 3 |
| IPI:IPI00007821.2 | 517  | 60.0  | 8.72  | Zinc finger protein 215                   |  |  | 42.02  | 3 |
| IPI:IPI00478170.1 | 648  | 74.2  | 9.11  | Zinc finger protein 595                   |  |  | 26.16  | 2 |
| IPI:IPI00478824.2 | 722  | 83.1  | 9.25  | Zinc finger protein 600                   |  |  | 21.82  | 2 |
| IPI:IPI00107595.4 | 615  | 67.2  | 6.98  | Zinc finger protein 653                   |  |  | 11.82  | 2 |

|                   |      |       |      |                         |  |  |        |   |
|-------------------|------|-------|------|-------------------------|--|--|--------|---|
| IPI:IPI00218025.6 | 581  | 65.8  | 5.58 | Zinc finger protein 654 |  |  | 13.18  | 2 |
| IPI:IPI00964583.2 | 1181 | 136.8 | 9.50 | zinc finger protein 729 |  |  | 121.48 | 2 |
| IPI:IPI00093195.4 | 691  | 80.0  | 9.55 | Zinc finger protein 770 |  |  | 23.57  | 2 |
| IPI:IPI00396098.1 | 664  | 75.2  | 9.47 | Zinc finger protein 800 |  |  | 22.41  | 2 |
| IPI:IPI01015739.1 | 672  | 76.8  | 6.32 | ZW10 protein            |  |  | 65.06  | 3 |
