# Supplementary material for: Analysis of the whole serum proteome using an integrated 2D LC-MS/MS system
Source: Royal Society of Chemistry journal article supplement (doi:10.1039/c4ay01274g), 2014-01-01
Supplement: c4ay01274g2.pdf [file c4ay01274g2.pdf]

**Table S2.** List of proteins detected in HCC serum.

| Accession   | Coverage | # PSMs | # Peptides | MW [kDa] | calc. pI | Score   | Description                                                                                                                                             |
|-------------|----------|--------|------------|----------|----------|---------|---------------------------------------------------------------------------------------------------------------------------------------------------------|
| gi105990532 | 25.03    | 1012   | 66         | 515.2    | 7.05     | 1343.34 | apolipoprotein B-100 precursor [Homo sapiens]                                                                                                           |
| gi225311    | 25.31    | 977    | 66         | 512.6    | 6.98     | 1324.72 | lipoprotein B100                                                                                                                                        |
| gi225310    | 24.57    | 972    | 65         | 515.2    | 7.06     | 1310.41 | lipoprotein B100                                                                                                                                        |
| gi119370332 | 52.25    | 1738   | 59         | 187.0    | 6.40     | 1995.72 | Complement C3                                                                                                                                           |
| gi122920512 | 76.07    | 4583   | 49         | 66.4     | 5.87     | 8935.61 | Chain A, Human Serum Albumin Complexed With Myristate And Aspirin                                                                                       |
| gi55669910  | 75.52    | 4500   | 46         | 65.2     | 5.80     | 8730.74 | Chain A, Crystal Structure Of The Ga Module Complexed With Human Serum Albumin                                                                          |
| gi308153640 | 36.77    | 1109   | 35         | 163.2    | 6.46     | 1690.96 | RecName: Full=Alpha-2-macroglobulin; Short=Alpha-2-M; AltName: Full=C3 and PZP-like alpha-2-macroglobulin domain-containing protein 5; Flags: Precursor |
| gi66932947  | 36.77    | 1103   | 35         | 163.2    | 6.42     | 1690.30 | alpha-2-macroglobulin precursor [Homo sapiens]                                                                                                          |
| gi118138017 | 49.95    | 975    | 30         | 103.9    | 5.29     | 1091.77 | Chain B, Human Complement Component C3b                                                                                                                 |
| gi110590600 | 52.22    | 903    | 29         | 74.8     | 7.12     | 1859.56 | Chain B, Apo-Human Serum Transferrin (Glycosylated)                                                                                                     |
| gi317455058 | 64.17    | 761    | 29         | 71.0     | 7.30     | 891.66  | Chain C, Crystal Structure Of Complement C3b In Complex With Factors B And D                                                                            |
| gi157831597 | 38.81    | 582    | 28         | 120.0    | 5.68     | 888.21  | Chain A, X-Ray Crystal Structure Of Human Ceruloplasmin At 3.0 Angstroms                                                                                |
| gi81175167  | 27.58    | 334    | 26         | 192.7    | 7.15     | 517.84  | Complement C4-B                                                                                                                                         |
| gi178557739 | 26.89    | 339    | 25         | 192.6    | 7.27     | 506.65  | complement C4-B preproprotein [Homo sapiens]                                                                                                            |
| gi123508    | 60.34    | 1354   | 24         | 45.2     | 6.58     | 3004.14 | RecName: Full=Haptoglobin; Contains: RecName: Full=Haptoglobin alpha chain; Contains: RecName: Full=Haptoglobin beta chain; Flags: Precursor            |
| gi166007177 | 43.59    | 3152   | 21         | 56.7     | 8.41     | 4295.30 | Chain T, Solution Structure Of Human Immunoglobulin M                                                                                                   |
| gi157831596 | 57.61    | 1653   | 20         | 44.2     | 5.59     | 2307.47 | Chain A, Alpha1-Antitrypsin                                                                                                                             |
| gi15825648  | 44.42    | 2655   | 19         | 50.4     | 8.32     | 3520.77 | Chain K, Crystal Structure Of The Intact Human Igg B12 With Broad And Potent Activity Against Primary Hiv-1 Isolates: A Template For Hiv Vaccine Design |
| gi90108666  | 63.37    | 418    | 19         | 28.1     | 5.38     | 965.32  | Chain C, Crystal Structure Of Lipid-Free Human Apolipoprotein A-I                                                                                       |
| gi494350    | 44.86    | 2768   | 18         | 46.8     | 8.88     | 3390.67 | Chain H, Three-Dimensional Structure Of A Human Immunoglobulin With A Hinge Deletion                                                                    |
| gi7546268   | 56.59    | 1541   | 18         | 37.6     | 5.67     | 1880.46 | Chain A, Crystal Structure Of Cleaved Antitrypsin Polymer                                                                                               |
| gi11514321  | 59.10    | 1526   | 18         | 37.6     | 5.47     | 1867.41 | Chain A, Crystal Structure Of A Serpin:protease Complex                                                                                                 |
| gi34810821  | 52.03    | 1522   | 18         | 44.2     | 5.80     | 1859.46 | Chain A, Non-Covalent Complex Between Alpha-1-Pi-Pittsburgh And S195a Trypsin                                                                           |
| gi343781254 | 56.33    | 1457   | 18         | 41.8     | 5.97     | 1577.18 | Chain A, Crystal Structure Of An Alpha-1-Antitrypsin Trimer                                                                                             |

|             |       |      |    |        |      |         |                                                                                                                                                                                                                                                                                                                      |
|-------------|-------|------|----|--------|------|---------|----------------------------------------------------------------------------------------------------------------------------------------------------------------------------------------------------------------------------------------------------------------------------------------------------------------------|
| gi239781889 | 24.65 | 298  | 17 | 136.9  | 6.54 | 414.57  | Chain A, Solution Structure Of Human Complement Factor H In 250 Mm Nacl Buffer                                                                                                                                                                                                                                       |
| gi230581    | 34.73 | 2695 | 16 | 49.7   | 8.15 | 3240.78 | Chain H, Dir Primaerstruktur Des Kristallisierbaren Monoklonalen Immunoglobulins Igg1 Kol. Ii. Aminosaeuresequenz Der L- Kette, Lambda-Typ, Subgruppe I (German)                                                                                                                                                     |
| gi2146957   | 42.25 | 2552 | 16 | 41.8   | 7.61 | 3226.61 | Ig heavy chain V region precursor - human                                                                                                                                                                                                                                                                            |
| gi18655427  | 56.55 | 319  | 15 | 51.2   | 5.26 | 478.52  | Chain B, A Structural Basis For The Unique Binding Features Of The Human Vitamin D-Binding Protein                                                                                                                                                                                                                   |
| gi8569503   | 61.84 | 2643 | 14 | 23.5   | 7.83 | 3098.71 | Chain B, Fc Fragment Of Human Igg1 In Complex With An Engineered 13 Residue Peptide Dcawhlgelvwct-Nh2                                                                                                                                                                                                                |
| gi113584    | 62.89 | 546  | 14 | 37.6   | 6.51 | 935.12  | RecName: Full=Ig alpha-1 chain C region                                                                                                                                                                                                                                                                              |
| gi193806361 | 35.28 | 490  | 14 | 41.3   | 7.90 | 1203.70 | RecName: Full=Ig gamma-3 chain C region; AltName: Full=HDC; AltName: Full=Heavy chain disease protein                                                                                                                                                                                                                |
| gi45580723  | 39.08 | 334  | 14 | 39.0   | 7.09 | 1126.07 | haptoglobin-related protein precursor [Homo sapiens]                                                                                                                                                                                                                                                                 |
| gi218512079 | 49.39 | 1208 | 13 | 35.9   | 7.59 | 2307.25 | RecName: Full=Ig gamma-2 chain C region                                                                                                                                                                                                                                                                              |
| gi443345    | 41.67 | 651  | 13 | 40.6   | 5.24 | 794.34  | Chain A, Crystal Structure Of Cleaved Human Alpha1-Antichymotrypsin At 2.7 Angstroms Resolution And Its Comparison With Other Serpins                                                                                                                                                                                |
| gi6980544   | 35.66 | 458  | 13 | 45.3   | 5.43 | 710.87  | Chain A, Alpha1-Antichymotrypsin Serpin In The Delta Conformation (Partial Loop Insertion)                                                                                                                                                                                                                           |
| gi243169    | 42.24 | 2486 | 12 | 38.7   | 6.84 | 2496.30 | Ig gamma 2 H chain, BUR [human, Peptide Mutant, 348 aa]                                                                                                                                                                                                                                                              |
| gi13096340  | 74.42 | 1425 | 12 | 23.3   | 6.01 | 2944.94 | Chain C, Structure Of The Fab Fragment From A Human Igm Cold Agglutinin                                                                                                                                                                                                                                              |
| gi262050538 | 27.67 | 475  | 12 | 99.8   | 6.47 | 433.29  | inter-alpha-trypsin inhibitor heavy chain H4 isoform 2 precursor [Homo sapiens]                                                                                                                                                                                                                                      |
| gi584908    | 26.05 | 188  | 12 | 85.5   | 7.06 | 212.88  | RecName: Full=Complement factor B; AltName: Full=C3/C5 convertase; AltName: Full=Glycine-rich beta glycoprotein; Short=GBG; AltName: Full=PBF2; AltName: Full=Properdin factor B; Contains: RecName: Full=Complement factor B Ba fragment; Contains: RecName: Full=Complement factor B Bb fragment; Flags: Precursor |
| gi291045225 | 0.51  | 55   | 12 | 3711.3 | 6.52 | 648.39  | titin isoform N2-A [Homo sapiens]                                                                                                                                                                                                                                                                                    |
| gi290560071 | 57.21 | 1392 | 11 | 25.1   | 5.62 | 2886.90 | Chain L, Crystal Structure Of The Humanized Recombinant Fab Fragment Of A Murine; Antibody                                                                                                                                                                                                                           |
| gi238537877 | 70.14 | 1385 | 11 | 23.1   | 7.77 | 2856.45 | Chain L, Crystal Structure Of The Fab Fragment Of Anti-Cd20 Antibody Ofatumumab                                                                                                                                                                                                                                      |
| gi42543644  | 61.79 | 1363 | 11 | 23.1   | 7.20 | 2821.93 | Chain L, Crystal Structure Of Human Anti-Hiv-1 Gp120-Reactive Antibody 48d                                                                                                                                                                                                                                           |
| gi386853    | 43.79 | 124  | 11 | 47.9   | 6.65 | 144.22  | kininogen [Homo sapiens]                                                                                                                                                                                                                                                                                             |
| gi160877748 | 55.14 | 1429 | 10 | 23.3   | 8.03 | 2929.64 | Chain L, Neuropilin-1 B1 Domain In Complex With A Vegf-Blocking Fab                                                                                                                                                                                                                                                  |
| gi15825713  | 58.41 | 1423 | 10 | 23.3   | 8.05 | 2908.70 | Chain C, Antibody-Antigen Complex                                                                                                                                                                                                                                                                                    |

|             |       |      |    |      |      |         |                                                                                                                                                  |
|-------------|-------|------|----|------|------|---------|--------------------------------------------------------------------------------------------------------------------------------------------------|
| gi442828    | 58.96 | 1403 | 10 | 23.2 | 8.03 | 2877.12 | Chain L, Structure Of A Human Monoclonal Antibody Fab Fragment Against Gp41 Of Human Immunodeficiency Virus Type I                               |
| gi7438712   | 54.88 | 1402 | 10 | 23.4 | 7.72 | 2891.32 | Ig kappa chain NIG93 precursor - human                                                                                                           |
| gi268612304 | 53.95 | 1398 | 10 | 23.5 | 7.15 | 2931.09 | Chain A, Structure Of Hiv-1 Gp120 (Core With V3) In Complex With Cd4- Binding-Site Antibody F105                                                 |
| gi99031801  | 54.88 | 1398 | 10 | 23.3 | 6.55 | 2908.40 | Chain L, Crystal Structure Of A Glycosylated Fab From An Igm Cryoglobulin With Properties Of A Natural Proteolytic Antibody                      |
| gi223673815 | 58.41 | 1393 | 10 | 23.4 | 7.25 | 2888.17 | Chain L, Crystal Structure Of The Major Grass Pollen Allergen Phl P 2 In Complex With Its Specific Ige-Fab                                       |
| gi122920237 | 58.41 | 1392 | 10 | 23.3 | 7.77 | 2913.68 | Chain M, Crystal Structure Of Hiv-1 Neutralizing Human Fab 4e10 In Complex With A Thioether-Linked Peptide Encompassing The 4e10 Epitope On Gp41 |
| gi219109302 | 58.41 | 1384 | 10 | 23.2 | 6.54 | 2853.39 | Chain O, Solution Structure Of Human Siga2                                                                                                       |
| gi168177215 | 55.40 | 1380 | 10 | 23.0 | 7.30 | 2844.66 | Chain L, Crystal Structure Of The Extracellular Region Of The Epidermal Growth Factor Receptor In Complex With The Fab Fragment Of Imc-11f8      |
| gi42543648  | 55.14 | 1380 | 10 | 23.4 | 7.77 | 2877.92 | Chain C, Crystal Structure Of Human Anti-Hiv-1 Gp120-Reactive Antibody 17b                                                                       |
| gi344189791 | 58.41 | 1376 | 10 | 23.2 | 7.17 | 2848.27 | Chain L, Structural Basis For The Function Of Two Anti-Vegf Receptor Antibodies                                                                  |
| gi42543655  | 58.41 | 1374 | 10 | 23.4 | 8.05 | 2792.70 | Chain D, Crystal Structure Of Human Anti-Hiv-1 Gp120 Reactive Antibody 412d                                                                      |
| gi238284    | 55.14 | 1371 | 10 | 23.6 | 6.76 | 2845.69 | light chain kappa Sci, k Sci=Bence Jones protein [human, Peptide, 214 aa]                                                                        |
| gi6435718   | 58.62 | 102  | 10 | 35.4 | 7.90 | 258.11  | Chain A, Crystal Structure Of The Glycosylated Five-Domain Human Beta2-Glycoprotein I Purified From Blood Plasma                                 |
| gi69990     | 37.76 | 98   | 10 | 51.9 | 5.97 | 206.06  | alpha-1-B-glycoprotein - human                                                                                                                   |
| gi7439150   | 35.32 | 76   | 10 | 49.4 | 6.77 | 203.60  | Ig mu chain C region - human                                                                                                                     |
| gi343197335 | 50.00 | 1419 | 9  | 23.9 | 5.22 | 2934.37 | Chain L, Crystal Structure Of Antirsvf Fab B21m                                                                                                  |
| gi67464527  | 49.55 | 1388 | 9  | 24.2 | 6.55 | 2893.45 | Chain G, The Structure Of An Antitumor Ch2-Domain-Deleted Humanized Antibody                                                                     |
| gi298508414 | 49.77 | 1382 | 9  | 23.5 | 7.69 | 2828.30 | Chain L, Crystal Structure Of Igf-Ii Antibody Complex                                                                                            |
| gi118137446 | 52.40 | 1375 | 9  | 22.7 | 7.78 | 2828.95 | Chain L, Crystal Structure Of The Hiv-1 Neutralizing Antibody D5 Fab Bound To The Gp41 Inner-Core Mimetic 5-Helix                                |
| gi307776479 | 50.93 | 1371 | 9  | 23.3 | 7.33 | 2824.82 | Chain L, Hiv-1 Antibody 2f5 In Complex With Epitope Scaffold Es2                                                                                 |
| gi7438710   | 50.70 | 1371 | 9  | 23.4 | 8.06 | 2830.19 | Ig kappa chain NIG2 precursor - human                                                                                                            |
| gi20150130  | 50.00 | 1371 | 9  | 23.8 | 6.90 | 2830.20 | Chain Y, Structure Of Cd40l In Complex With The Fab Fragment Of Humanized 5c8 Antibody                                                           |
| gi5542066   | 50.93 | 1370 | 9  | 23.6 | 6.33 | 2835.78 | Chain L, Comparison Of The Three-Dimensional Structures Of A Humanized And A Chimeric Fab Of An Anti-Gamma-Interferon Antibody                   |

|             |       |      |   |       |      |         |                                                                                                                                                                                                                                                                                       |
|-------------|-------|------|---|-------|------|---------|---------------------------------------------------------------------------------------------------------------------------------------------------------------------------------------------------------------------------------------------------------------------------------------|
| gi165761039 | 49.77 | 1369 | 9 | 23.3  | 6.52 | 2826.88 | Chain L, Crystal Structure Analysis Of Anti-Hiv-1 V3-Fab F425-B4e8 In Complex With A V3-Peptide                                                                                                                                                                                       |
| gi15825650  | 50.23 | 1288 | 9 | 23.7  | 8.73 | 2568.94 | Chain M, Crystal Structure Of The Intact Human Igg B12 With Broad And Potent Activity Against Primary Hiv-1 Isolates: A Template For Hiv Vaccine Design                                                                                                                               |
| gi15825659  | 54.98 | 1133 | 9 | 22.9  | 8.13 | 2257.99 | Chain A, Human Factor Viii C2 Domain Complexed To Human Monoclonal Bo2c11 Fab.                                                                                                                                                                                                        |
| gi47132549  | 9.79  | 67   | 9 | 239.5 | 5.88 | 128.54  | fibronectin isoform 6 preproprotein [Homo sapiens]                                                                                                                                                                                                                                    |
| gi146386605 | 34.87 | 58   | 9 | 43.8  | 7.68 | 100.55  | Chain A, Crystal Structure Of Latent Human C1-Inhibitor                                                                                                                                                                                                                               |
| gi343197707 | 51.18 | 548  | 8 | 22.4  | 6.89 | 1213.72 | Chain N, Influenza Hemagglutinin In Complex With A Neutralizing Antibody                                                                                                                                                                                                              |
| gi229597973 | 56.22 | 547  | 8 | 22.6  | 6.30 | 1221.74 | Chain L, Crystal Structure Of Pcsk9 In Complex With Fab From Ldlr Competitive Antibody                                                                                                                                                                                                |
| gi443561    | 52.36 | 546  | 8 | 22.7  | 7.17 | 1207.14 | Chain C, Crystal Structure Of The Fab Fragment From The Human Myeloma Immunoglobulin Igg Hil At 1.8 Angstroms Resolution                                                                                                                                                              |
| gi241913396 | 51.85 | 545  | 8 | 23.1  | 5.88 | 1232.32 | Chain A, Hecidin-Fab Complex                                                                                                                                                                                                                                                          |
| gi312208150 | 49.30 | 537  | 8 | 22.6  | 8.12 | 1217.78 | Chain L, Crystal Structure Of The Cluster Ii Fab 1281 In Complex With Hiv-1 Gp41 Ectodomain                                                                                                                                                                                           |
| gi106657    | 45.13 | 534  | 8 | 24.3  | 7.66 | 1207.40 | Ig lambda chain - human (fragment)                                                                                                                                                                                                                                                    |
| gi215794600 | 38.02 | 472  | 8 | 22.7  | 5.21 | 1066.84 | Chain A, Crystal Structure Of Human Alpha 1 Acid Glycoprotein                                                                                                                                                                                                                         |
| gi2135473   | 45.29 | 392  | 8 | 36.5  | 6.27 | 630.49  | Ig alpha-2 chain - human (fragment)                                                                                                                                                                                                                                                   |
| gi1708182   | 28.35 | 322  | 8 | 51.6  | 7.02 | 508.14  | RecName: Full=Hemopexin; AltName: Full=Beta-1B-glycoprotein; Flags: Precursor                                                                                                                                                                                                         |
| gi4502511   | 24.87 | 151  | 8 | 63.1  | 5.59 | 172.97  | complement component C9 precursor [Homo sapiens]                                                                                                                                                                                                                                      |
| gi130316    | 19.75 | 40   | 8 | 90.5  | 7.24 | 124.43  | RecName: Full=Plasminogen; Contains: RecName: Full=Plasmin heavy chain A; Contains: RecName: Full=Activation peptide; Contains: RecName: Full=Angiostatin; Contains: RecName: Full=Plasmin heavy chain A, short form; Contains: RecName: Full=Plasmin light chain B; Flags: Precursor |
| gi3659940   | 52.43 | 2236 | 7 | 23.4  | 7.42 | 1674.44 | Chain A, Crystal Structure Of A Human Igm Rheumatoid Factor Fab In Complex With Its Autoantigen Igg Fc                                                                                                                                                                                |
| gi106482    | 38.53 | 2226 | 7 | 23.7  | 5.31 | 1911.62 | Ig heavy chain V-III region (ART) - human (fragments)                                                                                                                                                                                                                                 |
| gi67464528  | 25.00 | 2167 | 7 | 36.9  | 8.19 | 1817.16 | Chain H, The Structure Of An Antitumor Ch2-Domain-Deleted Humanized Antibody                                                                                                                                                                                                          |
| gi106654    | 42.92 | 538  | 7 | 24.5  | 7.24 | 1198.57 | Ig lambda chain - human                                                                                                                                                                                                                                                               |
| gi300508598 | 42.99 | 533  | 7 | 22.6  | 8.06 | 1201.82 | Chain L, Crystal Structure Of Anti-Hiv-1 V3 Fab 3074 In Complex With A Vi191 V3                                                                                                                                                                                                       |
| gi106640    | 40.25 | 533  | 7 | 24.8  | 7.06 | 1190.05 | Ig lambda chain - human                                                                                                                                                                                                                                                               |

|             |       |      |   |       |      |         |                                                                                                                                                                                                                                                                                                            |
|-------------|-------|------|---|-------|------|---------|------------------------------------------------------------------------------------------------------------------------------------------------------------------------------------------------------------------------------------------------------------------------------------------------------------|
| gi46015319  | 41.86 | 532  | 7 | 22.7  | 7.77 | 1188.66 | Chain M, Crystal Structure Analysis Of Anti-Hiv-1 Fab 447-52d In Complex With V3 Peptide                                                                                                                                                                                                                   |
| gi146387536 | 44.44 | 455  | 7 | 24.7  | 7.99 | 830.60  | Chain M, Crystal Structure Of An Autoimmune Complex Between A Human Igm Rheumatoid Factor And Igg1 Fc Reveals A Novel Fc Epitope And Evidence For Affinity Maturation                                                                                                                                      |
| gi254220856 | 38.67 | 278  | 7 | 23.6  | 9.06 | 523.61  | Chain K, Structure Of Il-17a In Complex With A Potent, Fully Human Neutralising Antibody                                                                                                                                                                                                                   |
| gi270047628 | 37.34 | 239  | 7 | 25.4  | 8.50 | 531.61  | Chain H, Crystal Structure Of Anti-Hiv-1 Fab 537-10d In Complex With V3 Peptide Mn                                                                                                                                                                                                                         |
| gi157836282 | 45.25 | 126  | 7 | 23.3  | 8.50 | 424.16  | Chain X, Structure Of Vegf Complexed To A Fab Containing Tyr And Ser In The Cdrs                                                                                                                                                                                                                           |
| gi163931036 | 42.67 | 124  | 7 | 23.7  | 8.72 | 416.59  | Chain H, Protease Domain Of Hgfa With Inhibitor Fab58                                                                                                                                                                                                                                                      |
| gi119389707 | 43.53 | 123  | 7 | 24.4  | 8.53 | 417.35  | Chain H, Crystal Structure Of Hbr3 Bound To Cb3s-Fab                                                                                                                                                                                                                                                       |
| gi281306950 | 44.20 | 115  | 7 | 23.5  | 8.51 | 389.67  | Chain H, Crystal Structure Of Hgfa In Complex With The Allosteric Non- Inhibitory Antibody Fab40.Deltatrp And Ac-Kqlr-Chloromethylketone                                                                                                                                                                   |
| gi139653    | 24.48 | 91   | 7 | 54.3  | 5.80 | 243.01  | RecName: Full=Vitronectin; AltName: Full=S-protein; AltName: Full=Serum-spreading factor; AltName: Full=V75; Contains: RecName: Full=Vitronectin V65 subunit; Contains: RecName: Full=Vitronectin V10 subunit; Contains: RecName: Full=Somatomedin-B; Flags: Precursor                                     |
| gi2851501   | 16.47 | 59   | 7 | 101.3 | 6.79 | 109.56  | RecName: Full=Inter-alpha-trypsin inhibitor heavy chain H1; Short=ITI heavy chain H1; Short=ITI-HC1; Short=Inter-alpha-inhibitor heavy chain 1; AltName: Full=Inter-alpha-trypsin inhibitor complex component III; AltName: Full=Serum-derived hyaluronan-associated protein; Short=SHAP; Flags: Precursor |
| gi166203665 | 13.37 | 49   | 7 | 99.8  | 5.74 | 111.21  | RecName: Full=Inter-alpha-trypsin inhibitor heavy chain H3; Short=ITI heavy chain H3; Short=ITI-HC3; Short=Inter-alpha-inhibitor heavy chain 3; AltName: Full=Serum-derived hyaluronan-associated protein; Short=SHAP; Flags: Precursor                                                                    |
| gi319443755 | 10.68 | 49   | 7 | 188.2 | 6.52 | 62.42   | Chain C, Structure Of Complement C5 In Complex With Cvf And Ssl7                                                                                                                                                                                                                                           |
| gi83754224  | 34.88 | 1008 | 6 | 23.2  | 7.17 | 1987.98 | Chain L, Crystal Structure Of Hiv-1 Jr-F1 Gp120 Core Protein Containing The Third Variable Region (V3) Complexed With Cd4 And The X5 Antibody                                                                                                                                                              |
| gi332639403 | 40.37 | 568  | 6 | 23.9  | 5.39 | 1262.53 | Chain L, Crystal Structure Of The Fab Domain Of Omalizumab At 2.41a                                                                                                                                                                                                                                        |
| gi56966694  | 43.33 | 534  | 6 | 22.5  | 6.52 | 1192.85 | Chain M, Crystal Structure Of Hla-A1:mage-A1 In Complex With Fab-Hyb3                                                                                                                                                                                                                                      |

|             |       |     |   |       |      |        |                                                                                                                                                                                                                                                                                                           |
|-------------|-------|-----|---|-------|------|--------|-----------------------------------------------------------------------------------------------------------------------------------------------------------------------------------------------------------------------------------------------------------------------------------------------------------|
| gi226438324 | 31.00 | 299 | 6 | 24.4  | 8.51 | 607.42 | Chain H, Crystal Structure Of The Complex Between Cnto607 Fab And Il- 13                                                                                                                                                                                                                                  |
| gi259090248 | 32.73 | 274 | 6 | 23.7  | 8.05 | 556.41 | Chain X, Crystal Structure Of Intermediate Affinity I Domain Of Integrin Lfa-1 With The Fab Fragment Of Its Antibody Al-57                                                                                                                                                                                |
| gi345110944 | 35.50 | 266 | 6 | 24.4  | 8.31 | 506.16 | Chain I, Structural And Functional Characterization Of An Agonistic Anti-Human Epha2 Monoclonal Antibody                                                                                                                                                                                                  |
| gi335892419 | 31.14 | 259 | 6 | 24.1  | 8.32 | 475.75 | Chain B, Crystal Structure Of Human Germline Antibody 3-23B3                                                                                                                                                                                                                                              |
| gi296863486 | 31.56 | 211 | 6 | 23.7  | 8.51 | 436.87 | Chain B, Crystal Structure Of Human Anti-Steroid Fab 5f2 In Complex With Testosterone                                                                                                                                                                                                                     |
| gi56966692  | 38.57 | 209 | 6 | 23.8  | 8.82 | 458.42 | Chain I, Crystal Structure Of Hla-A1:mage-A1 In Complex With Fab-Hyb3                                                                                                                                                                                                                                     |
| gi268612332 | 27.27 | 137 | 6 | 24.8  | 8.98 | 417.26 | Chain H, Crystal Structure Of Hiv-Gp120 Core In Complex With Cd4-Binding Site Antibody B13, Space Group C222                                                                                                                                                                                              |
| gi224983666 | 33.63 | 119 | 6 | 23.8  | 8.69 | 407.20 | Chain H, C3b In Complex With A C3b Specific Fab                                                                                                                                                                                                                                                           |
| gi315583383 | 30.93 | 112 | 6 | 25.4  | 8.87 | 313.58 | Chain H, Crystal Structure Of Anti-II-15 Antibody In Complex With Human II-15                                                                                                                                                                                                                             |
| gi223962    | 39.52 | 102 | 6 | 31.2  | 5.08 | 114.82 | complement C4d variant                                                                                                                                                                                                                                                                                    |
| gi229462889 | 13.42 | 71  | 6 | 106.4 | 6.86 | 91.77  | RecName: Full=Inter-alpha-trypsin inhibitor heavy chain H2; Short=ITI heavy chain H2; Short=ITI-HC2; Short=Inter-alpha-inhibitor heavy chain 2; AltName: Full=Inter-alpha-trypsin inhibitor complex component II; AltName: Full=Serum-derived hyaluronan-associated protein; Short=SHAP; Flags: Precursor |
| gi416733    | 15.24 | 52  | 6 | 67.0  | 7.30 | 105.61 | RecName: Full=C4b-binding protein alpha chain; Short=C4bp; AltName: Full=Proline-rich protein; Short=PRP; Flags: Precursor                                                                                                                                                                                |
| gi223961    | 34.36 | 38  | 6 | 31.2  | 4.87 | 83.87  | complement C4d                                                                                                                                                                                                                                                                                            |
| gi169791777 | 56.16 | 37  | 6 | 15.9  | 7.65 | 91.77  | Chain O, Human Hemoglobin D Los Angeles: Crystal Structure                                                                                                                                                                                                                                                |
| gi61679606  | 56.55 | 37  | 6 | 15.7  | 7.23 | 91.77  | Chain D, T-To-T(High) Quaternary Transitions In Human Hemoglobin: Deshis146beta Deoxy Low-Salt                                                                                                                                                                                                            |
| gi46014948  | 56.16 | 32  | 6 | 15.9  | 8.06 | 83.44  | Chain D, Crystal Structure Of Human Hemoglobin E At 1.73 A Resolution                                                                                                                                                                                                                                     |
| gi146345396 | 10.17 | 20  | 6 | 104.7 | 6.76 | 60.71  | RecName: Full=Complement component C6; Flags: Precursor                                                                                                                                                                                                                                                   |
| gi160380714 | 3.32  | 16  | 6 | 340.0 | 6.07 | 125.65 | RecName: Full=Kalirin; AltName: Full=Huntingtin-associated protein-interacting protein; AltName: Full=Protein Duo; AltName: Full=Serine/threonine-protein kinase with Dbl- and pleckstrin homology domain                                                                                                 |
| gi499139    | 24.80 | 318 | 5 | 39.3  | 5.72 | 302.56 | alpha 2-HS-glycoprotein, alpha 2HSG=insulin receptor inhibitor [human, liver, Peptide, 367 aa]                                                                                                                                                                                                            |
| gi228312289 | 37.26 | 303 | 5 | 22.7  | 6.90 | 772.78 | Chain K, Rational Development Of High-Affinity T-Cell Receptor-Like Antibodies                                                                                                                                                                                                                            |

|             |       |     |   |       |      |        |                                                                                                                                                                                                                                                                                            |
|-------------|-------|-----|---|-------|------|--------|--------------------------------------------------------------------------------------------------------------------------------------------------------------------------------------------------------------------------------------------------------------------------------------------|
| gi229597974 | 28.15 | 207 | 5 | 25.4  | 7.49 | 482.26 | Chain H, Crystal Structure Of Pcsk9 In Complex With Fab From Ldlr Competitive Antibody                                                                                                                                                                                                     |
| gi87783     | 46.82 | 207 | 5 | 23.8  | 5.81 | 332.12 | Ig alpha-2 chain C region (allotype A2m(2)) - human (fragment)                                                                                                                                                                                                                             |
| gi442829    | 27.95 | 199 | 5 | 24.4  | 8.29 | 421.47 | Chain H, Structure Of A Human Monoclonal Antibody Fab Fragment Against Gp41 Of Human Immunodeficiency Virus Type I                                                                                                                                                                         |
| gi323714410 | 30.53 | 192 | 5 | 22.6  | 6.28 | 511.27 | Chain A, Crystal Structure Of The A Variant Of Human Alpha1-Acid Glycoprotein And Chlorpromazine Complex                                                                                                                                                                                   |
| gi478652    | 50.35 | 183 | 5 | 15.1  | 8.90 | 406.68 | Ig heavy chain V region - human (fragment)                                                                                                                                                                                                                                                 |
| gi70058     | 36.47 | 178 | 5 | 36.6  | 7.55 | 295.14 | Ig alpha-2 chain C region - human                                                                                                                                                                                                                                                          |
| gi106368    | 11.59 | 132 | 5 | 55.9  | 7.87 | 149.08 | Ig delta chain (WIE) - human                                                                                                                                                                                                                                                               |
| gi118137309 | 19.44 | 107 | 5 | 48.4  | 5.91 | 178.94 | Chain I, Crystal Structure Of Antithrombin-Iii                                                                                                                                                                                                                                             |
| gi255311886 | 28.57 | 101 | 5 | 23.3  | 9.09 | 313.72 | Chain A, Bha10 Igg1 Wild-Type Fab - Antibody Directed At Human Ltbr                                                                                                                                                                                                                        |
| gi325533399 | 31.22 | 99  | 5 | 23.6  | 8.94 | 293.95 | Chain A, Crystal Structure Of The Tsh Receptor In Complex With A Blocking Type Tshr Autoantibody                                                                                                                                                                                           |
| gi231458    | 30.35 | 88  | 5 | 23.6  | 5.11 | 287.07 | RecName: Full=Alpha-1-acid glycoprotein 2; Short=AGP 2; AltName: Full=Orosomucoid-2; Short=OMD 2; Flags: Precursor                                                                                                                                                                         |
| gi312597394 | 29.57 | 87  | 5 | 24.7  | 9.11 | 304.20 | Chain H, Crystal Structure Of The Fab Fragment Of The Human Neutralizing Anti-West Nile Virus Mab Cr4354                                                                                                                                                                                   |
| gi225028    | 59.48 | 83  | 5 | 12.4  | 8.91 | 193.39 | rheumatoid factor Ig kappa CUR                                                                                                                                                                                                                                                             |
| gi160877747 | 30.00 | 52  | 5 | 24.3  | 8.69 | 179.95 | Chain H, Neuropilin-1 B1 Domain In Complex With A Vegf-Blocking Fab                                                                                                                                                                                                                        |
| gi135807    | 12.22 | 49  | 5 | 70.0  | 5.90 | 109.39 | RecName: Full=Prothrombin; AltName: Full=Coagulation factor II; Contains: RecName: Full=Activation peptide fragment 1; Contains: RecName: Full=Activation peptide fragment 2; Contains: RecName: Full=Thrombin light chain; Contains: RecName: Full=Thrombin heavy chain; Flags: Precursor |
| gi160877743 | 31.17 | 49  | 5 | 24.8  | 8.50 | 171.55 | Chain H, Neuropilin-2 A1a2b1b2 Domains In Complex With A Semaphorin- Blocking Fab                                                                                                                                                                                                          |
| gi146386820 | 30.49 | 46  | 5 | 24.5  | 7.71 | 97.26  | Chain H, Crystal Structure Of The Pre-B Cell Receptor                                                                                                                                                                                                                                      |
| gi328877252 | 19.49 | 38  | 5 | 61.7  | 6.06 | 56.10  | Chain A, Crystal Structure Of Human Complement Component C8                                                                                                                                                                                                                                |
| gi160332335 | 1.58  | 18  | 5 | 628.7 | 6.15 | 219.42 | RecName: Full=Neuroblast differentiation-associated protein AHNAK; AltName: Full=Desmoyokin                                                                                                                                                                                                |
| gi262231746 | 1.96  | 10  | 5 | 596.1 | 6.43 | 87.95  | protein ALO17 isoform 1 [Homo sapiens]                                                                                                                                                                                                                                                     |
| gi32967605  | 4.86  | 7   | 5 | 175.3 | 6.81 | 83.59  | bromodomain adjacent to zinc finger domain protein 1A isoform b [Homo sapiens]                                                                                                                                                                                                             |

|             |       |     |   |       |      |        |                                                                                                                                                                                                                                                                                                                 |
|-------------|-------|-----|---|-------|------|--------|-----------------------------------------------------------------------------------------------------------------------------------------------------------------------------------------------------------------------------------------------------------------------------------------------------------------|
| gi294862529 | 1.19  | 7   | 5 | 860.1 | 5.25 | 208.16 | RecName: Full=Dystonin; AltName: Full=230 kDa bullous pemphigoid antigen; AltName: Full=230/240 kDa bullous pemphigoid antigen; AltName: Full=Bullous pemphigoid antigen 1; Short=BPA; Short=Bullous pemphigoid antigen; AltName: Full=Dystonia musculorum protein; AltName: Full=Hemidesmosomal plaque protein |
| gi325533400 | 27.57 | 351 | 4 | 22.6  | 8.12 | 607.37 | Chain B, Crystal Structure Of The Tsh Receptor In Complex With A Blocking Type Tshr Autoantibody                                                                                                                                                                                                                |
| gi333944425 | 30.62 | 255 | 4 | 22.1  | 5.83 | 464.16 | Chain M, Crystal Structure Of Fab Of Rhesus Mab 2.5b Specific For Quaternary Neutralizing Epitope Of Hiv-1 Gp120                                                                                                                                                                                                |
| gi223815    | 47.17 | 219 | 4 | 11.3  | 7.24 | 738.30 | Ig lambda C                                                                                                                                                                                                                                                                                                     |
| gi165761040 | 25.23 | 209 | 4 | 23.7  | 7.33 | 543.90 | Chain H, Crystal Structure Analysis Of Anti-Hiv-1 V3-Fab F425-B4e8 In Complex With A V3-Peptide                                                                                                                                                                                                                 |
| gi284191    | 64.29 | 177 | 4 | 10.7  | 8.84 | 319.40 | Ig heavy chain V region (DP-35) - human (fragment)                                                                                                                                                                                                                                                              |
| gi87860     | 51.02 | 163 | 4 | 10.8  | 8.46 | 326.38 | Ig heavy chain V-III region (TD-Vr) - human (fragment)                                                                                                                                                                                                                                                          |
| gi1082504   | 46.39 | 161 | 4 | 10.5  | 8.47 | 286.73 | Ig heavy chain V region (YAC-5) - human                                                                                                                                                                                                                                                                         |
| gi486865    | 38.46 | 160 | 4 | 13.2  | 7.99 | 278.64 | Ig heavy chain V region (clone alpha-TNF-A1) - human (fragment)                                                                                                                                                                                                                                                 |
| gi284208    | 64.29 | 157 | 4 | 10.7  | 7.96 | 316.00 | Ig heavy chain V region (DP-58) - human (fragment)                                                                                                                                                                                                                                                              |
| gi481342    | 35.43 | 157 | 4 | 13.7  | 6.57 | 170.90 | Ig heavy chain - human (fragment)                                                                                                                                                                                                                                                                               |
| gi422886    | 38.14 | 153 | 4 | 12.5  | 8.46 | 252.24 | Ig heavy chain - human                                                                                                                                                                                                                                                                                          |
| gi346104    | 45.92 | 153 | 4 | 10.8  | 9.13 | 170.90 | Ig heavy chain V region (COS 3) - human (fragment)                                                                                                                                                                                                                                                              |
| gi3659941   | 23.11 | 148 | 4 | 24.6  | 8.06 | 215.71 | Chain H, Crystal Structure Of A Human Igm Rheumatoid Factor Fab In Complex With Its Autoantigen Igg Fc                                                                                                                                                                                                          |
| gi291191169 | 29.44 | 136 | 4 | 23.4  | 7.17 | 394.23 | Chain L, Crystal Structure Of Li33 Igg1 Fab                                                                                                                                                                                                                                                                     |
| gi134105414 | 64.94 | 136 | 4 | 8.7   | 5.06 | 188.13 | Chain L, Structures Of Apolipoprotein A-Ii And A Lipid Surrogate Complex Provide Insights Into Apolipoprotein-Lipid Interactions                                                                                                                                                                                |
| gi8569410   | 17.04 | 135 | 4 | 24.1  | 8.29 | 163.17 | Chain F, Crystal Structure At 2.7a Resolution Of A Complex Between A Staphylococcus Aureus Domain And A Fab Fragment Of A Human Igm Antibody                                                                                                                                                                    |
| gi10835403  | 36.59 | 133 | 4 | 13.2  | 8.46 | 173.40 | Chain H, Crystal Structure Of An Unliganded (Native) Fv From A Human Igm Anti-Peptide Antibody                                                                                                                                                                                                                  |
| gi284196    | 46.39 | 133 | 4 | 10.5  | 8.47 | 185.55 | Ig heavy chain V region (DP-42) - human (fragment)                                                                                                                                                                                                                                                              |
| gi284188    | 61.22 | 132 | 4 | 10.7  | 7.97 | 195.68 | Ig heavy chain V region (DP-31) - human (fragment)                                                                                                                                                                                                                                                              |
| gi2135457   | 23.81 | 131 | 4 | 15.9  | 5.15 | 152.70 | Ig variable region (VDJ) (clone T20-11) - human (fragment)                                                                                                                                                                                                                                                      |
| gi87817     | 41.03 | 125 | 4 | 12.6  | 7.83 | 138.93 | Ig heavy chain precursor V-III region (Ab18) - human                                                                                                                                                                                                                                                            |



|             |       |     |   |       |      |        |                                                                                                                                                                                                                                 |
|-------------|-------|-----|---|-------|------|--------|---------------------------------------------------------------------------------------------------------------------------------------------------------------------------------------------------------------------------------|
| gi23200173  | 17.92 | 119 | 4 | 54.9  | 6.73 | 139.25 | Chain B, Crystal Structure Of Native Heparin Cofactor Ii                                                                                                                                                                        |
| gi15825660  | 20.93 | 113 | 4 | 22.7  | 5.54 | 345.34 | Chain B, Human Factor Viii C2 Domain Complexed To Human Monoclonal Bo2c11 Fab.                                                                                                                                                  |
| gi193885315 | 24.78 | 112 | 4 | 23.9  | 8.65 | 362.47 | Chain G, Crystal Structure Of The Trimeric Prefusion Ebola Virus Glycoprotein In Complex With A Neutralizing Antibody From A Human Survivor                                                                                     |
| gi270047625 | 23.83 | 101 | 4 | 25.2  | 8.50 | 335.68 | Chain I, Crystal Structure Of Anti-Hiv-1 Fab 447-52d In Complex With V3 Peptide W2rw020                                                                                                                                         |
| gi297787692 | 23.53 | 97  | 4 | 25.9  | 8.15 | 296.66 | Chain E, Structure Of Pg16, An Antibody With Broad And Potent Neutralization Of Hiv-1                                                                                                                                           |
| gi339717483 | 21.68 | 87  | 4 | 24.1  | 8.97 | 305.35 | Chain B, Crystal Structure Of Membrane-Type Serine Protease 1 (Mt-Sp1) In Complex With The Fab Inhibitor S4                                                                                                                     |
| gi118137445 | 22.58 | 85  | 4 | 22.7  | 8.32 | 288.09 | Chain H, Crystal Structure Of The Hiv-1 Neutralizing Antibody D5 Fab Bound To The Gp41 Inner-Core Mimetic 5-Helix                                                                                                               |
| gi494928    | 29.03 | 83  | 4 | 23.0  | 8.68 | 287.78 | Chain H, Crystal Structure Of Human Immunoglobulin Fragment Fab New Refined At 2.0 Angstroms Resolution                                                                                                                         |
| gi298508676 | 23.24 | 76  | 4 | 26.1  | 7.80 | 261.92 | Chain L, Crystal Structure Of Human Fab Pg16, A Broadly Reactive And Potent Hiv-1 Neutralizing Antibody                                                                                                                         |
| gi42543649  | 21.93 | 75  | 4 | 24.3  | 7.01 | 253.86 | Chain D, Crystal Structure Of Human Anti-Hiv-1 Gp120-Reactive Antibody 17b                                                                                                                                                      |
| gi71153172  | 7.01  | 72  | 4 | 117.7 | 6.52 | 135.57 | RecName: Full=Superkiller viralicidic activity 2-like 2; AltName: Full=ATP-dependent helicase SKIV2L2                                                                                                                           |
| gi2135449   | 58.93 | 72  | 4 | 12.2  | 5.96 | 91.47  | Ig light chain V region anti-F(ab')2 - human (fragment)                                                                                                                                                                         |
| gi224376    | 58.97 | 65  | 4 | 12.6  | 8.48 | 173.19 | Ig M kappa IIIb PIE                                                                                                                                                                                                             |
| gi1575043   | 25.92 | 60  | 4 | 39.7  | 5.22 | 125.44 | paraoxonase [Homo sapiens]                                                                                                                                                                                                      |
| gi308153572 | 25.92 | 58  | 4 | 39.7  | 5.22 | 119.46 | RecName: Full=Serum paraoxonase/arylesterase 1; Short=PON 1; AltName: Full=Aromatic esterase 1; Short=A-esterase 1; AltName: Full=K-45; AltName: Full=Serum aryldialkylphosphatase 1                                            |
| gi116241294 | 2.66  | 53  | 4 | 290.2 | 5.95 | 285.10 | RecName: Full=Centrosomal protein of 290 kDa; Short=Cep290; AltName: Full=Bardet-Biedl syndrome 14 protein; AltName: Full=Cancer/testis antigen 87; Short=CT87; AltName: Full=Nephrocystin-6; AltName: Full=Tumor antigen se2-2 |
| gi224377    | 54.69 | 52  | 4 | 13.8  | 8.46 | 163.35 | Ig M kappa IIIb SON                                                                                                                                                                                                             |
| gi7246026   | 22.63 | 48  | 4 | 31.6  | 6.05 | 68.65  | Chain D, Human Zinc-Alpha-2-Glycoprotein                                                                                                                                                                                        |
| gi106429    | 37.90 | 41  | 4 | 13.7  | 9.51 | 76.87  | Ig heavy chain V region (alpha-phOx15) - human (fragment)                                                                                                                                                                       |

|             |       |    |   |       |      |        |                                                                                                                                                                                                                                                    |
|-------------|-------|----|---|-------|------|--------|----------------------------------------------------------------------------------------------------------------------------------------------------------------------------------------------------------------------------------------------------|
| gi338817989 | 1.07  | 39 | 4 | 837.8 | 5.39 | 234.45 | RecName: Full=Microtubule-actin cross-linking factor 1, isoforms 1/2/3/5; AltName: Full=620 kDa actin-binding protein; Short=ABP620; AltName: Full=Actin cross-linking family protein 7; AltName: Full=Macrophin-1; AltName: Full=Trabeculin-alpha |
| gi110611903 | 3.04  | 37 | 4 | 222.9 | 5.85 | 73.64  | myosin-4 [Homo sapiens]                                                                                                                                                                                                                            |
| gi284218    | 45.92 | 36 | 4 | 10.8  | 9.13 | 83.17  | Ig heavy chain V region (DP-7) - human (fragment)                                                                                                                                                                                                  |
| gi284178    | 45.92 | 36 | 4 | 10.8  | 9.17 | 72.43  | Ig heavy chain V region (DP-15) - human (fragment)                                                                                                                                                                                                 |
| gi288558835 | 4.39  | 34 | 4 | 206.7 | 6.47 | 327.47 | RecName: Full=Afadin; AltName: Full=ALL1-fused gene from chromosome 6 protein; Short=Protein AF-6                                                                                                                                                  |
| gi67464416  | 43.31 | 32 | 4 | 14.1  | 9.06 | 57.61  | Chain B, The Crystal Structure Of A Humanized Antibody Fv 528                                                                                                                                                                                      |
| gi157879732 | 45.67 | 31 | 4 | 13.8  | 5.78 | 88.81  | Chain D, The Structure Of Human Retinol Binding Protein With Its Carrier Protein Transthyretin Reveals Interaction With The Carboxy Terminus Of Rbp                                                                                                |
| gi1082506   | 48.98 | 30 | 4 | 10.6  | 9.41 | 85.74  | Ig heavy chain V1 region (YAC-7) - human                                                                                                                                                                                                           |
| gi194368806 | 45.67 | 29 | 4 | 13.8  | 5.47 | 84.51  | Chain D, Crystal Structure Of The F87mL110M MUTANT OF HUMAN TRANSTHYRETIN AT Ph 4.6                                                                                                                                                                |
| gi2135464   | 40.38 | 29 | 4 | 11.6  | 9.33 | 46.43  | Ig heavy chain V region (clone RFTS7H), rheumatoid factor - human                                                                                                                                                                                  |
| gi87831     | 45.92 | 29 | 4 | 10.8  | 9.17 | 43.14  | Ig heavy chain V region (anti-DNA, R3.5H5G) - human (fragment)                                                                                                                                                                                     |
| gi284174    | 45.92 | 28 | 4 | 10.9  | 9.13 | 50.68  | Ig heavy chain V region (DP-1) - human (fragment)                                                                                                                                                                                                  |
| gi55669576  | 49.57 | 28 | 4 | 12.8  | 5.45 | 88.81  | Chain B, A Covalent Dimer Of Transthyretin That Affects The Amyloid Pathway                                                                                                                                                                        |
| gi281500697 | 45.67 | 26 | 4 | 13.8  | 6.16 | 76.72  | Chain B, Crystal Structure Of Human Transthyretin (E54k)                                                                                                                                                                                           |
| gi238054406 | 10.40 | 19 | 4 | 66.0  | 8.12 | 63.84  | RecName: Full=Keratin, type II cytoskeletal 1; AltName: Full=67 kDa cytokeratin; AltName: Full=Cytokeratin-1; Short=CK-1; AltName: Full=Hair alpha protein; AltName: Full=Keratin-1; Short=K1; AltName: Full=Type-II keratin Kb1                   |
| gi68508961  | 6.79  | 19 | 4 | 106.8 | 9.39 | 89.07  | centromere protein C 1 [Homo sapiens]                                                                                                                                                                                                              |
| gi179644    | 12.06 | 19 | 4 | 80.1  | 6.29 | 34.42  | human complement C1r [Homo sapiens]                                                                                                                                                                                                                |
| gi296439448 | 1.90  | 11 | 4 | 460.7 | 6.28 | 149.29 | RecName: Full=Alstrom syndrome protein 1                                                                                                                                                                                                           |
| gi122066060 | 1.55  | 9  | 4 | 520.8 | 7.05 | 117.43 | RecName: Full=Sacsin; AltName: Full=DnaJ homolog subfamily C member 29; Short=DNAJC29                                                                                                                                                              |
| gi56553729  | 39.04 | 9  | 4 | 15.9  | 8.05 | 37.29  | Chain D, Crystal Structure Of Human Hemoglobin A2 (In R2 State) At 2.2 A Resolution                                                                                                                                                                |

|             |       |     |   |       |      |        |                                                                                                                                                                                                                                                                                                                   |
|-------------|-------|-----|---|-------|------|--------|-------------------------------------------------------------------------------------------------------------------------------------------------------------------------------------------------------------------------------------------------------------------------------------------------------------------|
| gi6166599   | 3.11  | 8   | 4 | 226.4 | 5.60 | 114.09 | RecName: Full=Myosin-9; AltName: Full=Cellular myosin heavy chain, type A; AltName: Full=Myosin heavy chain 9; AltName: Full=Myosin heavy chain, non-muscle IIa; AltName: Full=Non-muscle myosin heavy chain A; Short=NMMHC-A; AltName: Full=Non-muscle myosin heavy chain IIa; Short=NMMHC II-a; Short=NMMHC-IIA |
| gi71061468  | 2.59  | 7   | 4 | 316.2 | 5.64 | 170.18 | centromere-associated protein E [Homo sapiens]                                                                                                                                                                                                                                                                    |
| gi60392986  | 4.42  | 5   | 4 | 153.8 | 6.89 | 95.38  | RecName: Full=DNA repair protein RAD50; Short=hRAD50                                                                                                                                                                                                                                                              |
| gi308153587 | 3.68  | 5   | 4 | 210.5 | 5.67 | 52.73  | RecName: Full=Kinesin-like protein KIF20B; AltName: Full=Cancer/testis antigen 90; Short=CT90; AltName: Full=Kinesin-related motor interacting with PIN1; AltName: Full=M-phase phosphoprotein 1; Short=MPP1                                                                                                      |
| gi284197    | 42.27 | 175 | 3 | 10.4  | 8.91 | 372.51 | Ig heavy chain V region (DP-45) - human                                                                                                                                                                                                                                                                           |
| gi284195    | 41.84 | 156 | 3 | 10.7  | 8.46 | 314.22 | Ig heavy chain V region (DP-40) - human (fragment)                                                                                                                                                                                                                                                                |
| gi66360149  | 35.34 | 149 | 3 | 12.4  | 7.96 | 248.42 | Chain A, Crystal Structure Of A Human Vh Domain                                                                                                                                                                                                                                                                   |
| gi284204    | 41.84 | 148 | 3 | 10.7  | 7.96 | 288.43 | Ig heavy chain V region (DP-51) - human (fragment)                                                                                                                                                                                                                                                                |
| gi284225    | 41.84 | 144 | 3 | 10.7  | 8.85 | 281.15 | Ig heavy chain V region (DP-77) - human (fragment)                                                                                                                                                                                                                                                                |
| gi486879    | 31.67 | 144 | 3 | 13.0  | 8.46 | 213.00 | Ig heavy chain V region (clone alpha-THY-32) - human (fragment)                                                                                                                                                                                                                                                   |
| gi486888    | 37.27 | 138 | 3 | 12.0  | 7.96 | 197.96 | Ig heavy chain V region (clone alpha-FOG1-H6) - human (fragment)                                                                                                                                                                                                                                                  |
| gi7439092   | 53.06 | 135 | 3 | 10.6  | 6.00 | 199.42 | Ig heavy chain V region - human (fragment)                                                                                                                                                                                                                                                                        |
| gi443042    | 20.16 | 127 | 3 | 13.8  | 8.00 | 153.83 | Chain H, Three Dimensional Structure Of An Fv From A Human Igm Immunoglobulin                                                                                                                                                                                                                                     |
| gi87848     | 25.74 | 126 | 3 | 11.3  | 7.96 | 150.41 | Ig heavy chain V-III region (JeB) - human (fragment)                                                                                                                                                                                                                                                              |
| gi546095    | 38.78 | 125 | 3 | 10.7  | 8.91 | 185.82 | anti-histone H1 WRI-170 antibody heavy chain variable region [human, systemic lupus erythematosus (Wri) patient, Peptide Partial, 98 aa]                                                                                                                                                                          |
| gi1362820   | 18.84 | 124 | 3 | 15.3  | 7.90 | 137.41 | Ig heavy chain V region precursor (HuA) - human (fragment)                                                                                                                                                                                                                                                        |
| gi87816     | 27.14 | 124 | 3 | 15.2  | 6.55 | 155.59 | Ig heavy chain precursor V-III region (38) - human                                                                                                                                                                                                                                                                |
| gi346115    | 18.57 | 124 | 3 | 15.3  | 5.41 | 136.41 | Ig heavy chain V region - human (fragment)                                                                                                                                                                                                                                                                        |
| gi118442839 | 26.06 | 122 | 3 | 37.6  | 7.39 | 120.54 | complement factor H-related protein 1 precursor [Homo sapiens]                                                                                                                                                                                                                                                    |
| gi327200568 | 42.08 | 117 | 3 | 23.5  | 7.64 | 96.78  | Chain H, Human Iga1 Fab Fragment                                                                                                                                                                                                                                                                                  |
| gi160286048 | 24.17 | 109 | 3 | 23.1  | 8.40 | 334.02 | Chain M, Crystal Structure Of A Recombinant Ige Fab Fragment In Complex With Bovine Beta-Lactoglobulin Allergen                                                                                                                                                                                                   |
| gi51247839  | 17.05 | 98  | 3 | 23.2  | 7.75 | 377.38 | Chain B, Crystal Structure Of A Humanized Fab Fragment Of Anti- Tissue-Factor Antibody In Complex With Tissue Factor                                                                                                                                                                                              |

|             |       |    |   |       |      |        |                                                                                                                                                                     |
|-------------|-------|----|---|-------|------|--------|---------------------------------------------------------------------------------------------------------------------------------------------------------------------|
| gi114039    | 14.51 | 91 | 3 | 36.1  | 5.73 | 52.64  | RecName: Full=Apolipoprotein E; Short=Apo-E; Flags: Precursor                                                                                                       |
| gi6980530   | 29.70 | 91 | 3 | 19.3  | 5.21 | 56.00  | Chain A, Apolipoprotein E3 (ApoE3), Trigonal Truncation Mutant 165                                                                                                  |
| gi90109519  | 16.82 | 89 | 3 | 23.7  | 7.17 | 336.60 | Chain F, Cofactor-Containing Antibodies: Crystal Structure Of The Original Yellow Antibody                                                                          |
| gi238537878 | 17.12 | 87 | 3 | 23.7  | 8.62 | 146.55 | Chain H, Crystal Structure Of The Fab Fragment Of Anti-Cd20 Antibody Ofatumumab                                                                                     |
| gi206729940 | 22.36 | 84 | 3 | 43.9  | 5.81 | 53.24  | RecName: Full=Apolipoprotein L1; AltName: Full=Apolipoprotein L; Short=Apo-L; Short=ApoL; AltName: Full=Apolipoprotein L-I; Short=ApoL-I; Flags: Precursor          |
| gi343197336 | 21.15 | 81 | 3 | 24.4  | 9.00 | 244.81 | Chain H, Crystal Structure Of Antirsvf Fab B21m                                                                                                                     |
| gi307776480 | 18.14 | 78 | 3 | 25.2  | 9.33 | 253.48 | Chain H, Hiv-1 Antibody 2f5 In Complex With Epitope Scaffold Es2                                                                                                    |
| gi42543651  | 19.15 | 78 | 3 | 24.7  | 7.83 | 243.60 | Chain H, Crystal Structure Of Human Anti-Hiv-1 Gp120-Reactive Antibody E51                                                                                          |
| gi353251928 | 17.57 | 78 | 3 | 25.5  | 8.35 | 260.09 | Chain H, Crystal Structure Of Broad And Potent Hiv-1 Neutralizing Antibody Pgt128 In Complex With A Glycosylated Engineered Gp120 Outer Domain With Miniv3 (Eodmv3) |
| gi355333014 | 18.26 | 77 | 3 | 24.6  | 8.69 | 249.67 | Chain H, Hiv-1 Neutralizing Antibody Z13e1 In Complex With Epitope Display Protein                                                                                  |
| gi443562    | 16.52 | 76 | 3 | 24.1  | 9.29 | 265.87 | Chain D, Crystal Structure Of The Fab Fragment From The Human Myeloma Immunoglobulin Igg Hil At 1.8 Angstroms Resolution                                            |
| gi296863728 | 17.73 | 75 | 3 | 23.8  | 7.36 | 247.15 | Chain H, Crystal Structure Sonic Hedgehog Bound To The 5e1 Fab Fragment                                                                                             |
| gi342351250 | 16.16 | 73 | 3 | 24.9  | 8.92 | 249.75 | Chain A, Crystal Structure Of Fab From 3bnc60, Highly Potent Anti-Hiv Antibody                                                                                      |
| gi339961201 | 8.50  | 73 | 3 | 63.4  | 7.31 | 56.75  | Chain D, Human Complement Factor I                                                                                                                                  |
| gi1942053   | 16.89 | 73 | 3 | 23.6  | 8.12 | 274.10 | Chain H, Structure Of Uncomplexed Fab Compared To Complex (1cly, 1clz)                                                                                              |
| gi291191168 | 19.82 | 67 | 3 | 24.3  | 8.72 | 118.75 | Chain H, Crystal Structure Of Li33 Igg1 Fab                                                                                                                         |
| gi82407724  | 32.54 | 61 | 3 | 13.7  | 8.48 | 81.56  | Chain I, Structural Analysis Of A Tight-Binding Fluorescein-Scfv; Apo Form                                                                                          |
| gi57015279  | 2.86  | 45 | 3 | 231.3 | 6.57 | 182.94 | RecName: Full=Citron Rho-interacting kinase; Short=CRIK; AltName: Full=Serine/threonine-protein kinase 21                                                           |
| gi106600    | 39.81 | 41 | 3 | 11.7  | 7.96 | 135.69 | Ig kappa chain V-III region (Jh) - human (fragment)                                                                                                                 |
| gi284209    | 41.84 | 39 | 3 | 10.7  | 8.02 | 151.02 | Ig heavy chain V region (DP-59) - human (fragment)                                                                                                                  |
| gi106437    | 36.75 | 38 | 3 | 12.7  | 8.44 | 58.82  | Ig heavy chain V region (VH5DJH5) - human                                                                                                                           |
| gi101943240 | 2.70  | 37 | 3 | 238.7 | 7.30 | 170.74 | general transcription factor 3C polypeptide 1 [Homo sapiens]                                                                                                        |
| gi480936    | 55.43 | 37 | 3 | 10.0  | 9.25 | 116.33 | Ig kappa chain V region (V-kappa 3) - human (fragment)                                                                                                              |
| gi1195515   | 63.89 | 36 | 3 | 11.8  | 8.44 | 59.26  | IgG4 light chain variable region {CDR region, acceptor Ab "Eu" } [human, Peptide Partial, 108 aa]                                                                   |

|             |       |    |   |       |      |        |                                                                                                                                                                                                                                                                                                 |
|-------------|-------|----|---|-------|------|--------|-------------------------------------------------------------------------------------------------------------------------------------------------------------------------------------------------------------------------------------------------------------------------------------------------|
| gi239781734 | 18.41 | 36 | 3 | 31.2  | 5.41 | 45.33  | Chain C, Complement C3b In Complex With Factor H Domains 1-4                                                                                                                                                                                                                                    |
| gi332278210 | 3.39  | 35 | 3 | 249.4 | 7.14 | 146.25 | RecName: Full=Dedicator of cytokinesis protein 10; AltName: Full=Zizimin-3                                                                                                                                                                                                                      |
| gi284187    | 58.00 | 35 | 3 | 10.9  | 8.46 | 136.31 | Ig heavy chain V region (DP-30) - human (fragment)                                                                                                                                                                                                                                              |
| gi486876    | 35.04 | 32 | 3 | 13.2  | 7.27 | 89.69  | Ig heavy chain V region (clone alpha-TNF-E1) - human (fragment)                                                                                                                                                                                                                                 |
| gi106625    | 46.36 | 31 | 3 | 12.0  | 8.47 | 114.02 | Ig kappa chain V region - human                                                                                                                                                                                                                                                                 |
| gi20336186  | 8.83  | 30 | 3 | 53.0  | 8.65 | 152.11 | proprotein convertase subtilisin/kexin type 6 isoform c preproprotein [Homo sapiens]                                                                                                                                                                                                            |
| gi61888896  | 4.86  | 29 | 3 | 151.1 | 6.33 | 61.07  | roundabout homolog 2 isoform ROBO2b [Homo sapiens]                                                                                                                                                                                                                                              |
| gi224036396 | 11.07 | 28 | 3 | 29.2  | 7.78 | 81.32  | Chain U, Crystal Structure Of Influenza Hemagglutinin (H5) In Complex With A Broadly Neutralizing Antibody F10                                                                                                                                                                                  |
| gi565139    | 38.32 | 28 | 3 | 11.8  | 6.52 | 98.75  | immunoglobulin heavy chain variable region [human, multiple myeloma patient 3, bone marrow aspirates, Peptide Partial Mutant, 107 aa]                                                                                                                                                           |
| gi146387534 | 17.75 | 27 | 3 | 24.8  | 8.06 | 78.11  | Chain I, Crystal Structure Of An Autoimmune Complex Between A Human Igm Rheumatoid Factor And Igg1 Fc Reveals A Novel Fc Epitope And Evidence For Affinity Maturation                                                                                                                           |
| gi284176    | 34.69 | 27 | 3 | 10.9  | 8.48 | 24.54  | Ig heavy chain V region (DP-12) - human (fragment)                                                                                                                                                                                                                                              |
| gi309319880 | 9.29  | 25 | 3 | 49.7  | 6.09 | 44.00  | Chain H, Crystal Structure Of Human Angiotensinogen Complexed With Renin                                                                                                                                                                                                                        |
| gi115527120 | 0.63  | 23 | 3 | 772.4 | 9.07 | 367.97 | nebulin isoform 3 [Homo sapiens]                                                                                                                                                                                                                                                                |
| gi47115668  | 8.38  | 22 | 3 | 65.3  | 5.27 | 41.71  | RecName: Full=Galectin-3-binding protein; AltName: Full=Basement membrane autoantigen p105; AltName: Full=Lectin galactoside-binding soluble 3-binding protein; AltName: Full=Mac-2-binding protein; Short=MAC2BP; Short=Mac-2 BP; AltName: Full=Tumor-associated antigen 90K; Flags: Precursor |
| gi2135462   | 33.33 | 21 | 3 | 14.8  | 8.94 | 74.51  | Ig variable region (VDJ) (clone T34-1) - human (fragment)                                                                                                                                                                                                                                       |
| gi260656198 | 22.28 | 20 | 3 | 41.9  | 6.95 | 22.35  | Chain D, Crystal Structure Of Human Gelsolin Domains G1-G3 Bound To Actin                                                                                                                                                                                                                       |
| gi227168    | 42.06 | 20 | 3 | 13.8  | 8.48 | 91.30  | Ig VH,anti-Rh(c)                                                                                                                                                                                                                                                                                |
| gi542884    | 26.32 | 18 | 3 | 12.5  | 5.06 | 59.70  | Ig kappa chain V-J region - human                                                                                                                                                                                                                                                               |
| gi1585222   | 2.06  | 18 | 3 | 350.4 | 6.80 | 99.33  | ATM gene                                                                                                                                                                                                                                                                                        |
| gi1082538   | 35.09 | 17 | 3 | 12.7  | 8.88 | 54.13  | Ig kappa chain precursor - human (fragment)                                                                                                                                                                                                                                                     |
| gi7656967   | 1.86  | 16 | 3 | 329.3 | 5.92 | 68.47  | cadherin EGF LAG seven-pass G-type receptor 1 precursor [Homo sapiens]                                                                                                                                                                                                                          |
| gi68052263  | 6.42  | 16 | 3 | 108.2 | 6.49 | 64.54  | RecName: Full=Mitogen-activated protein kinase kinase kinase 13; AltName: Full=Leucine zipper-bearing kinase; AltName: Full=Mixed lineage kinase; Short=MLK                                                                                                                                     |
| gi20141201  | 11.17 | 16 | 3 | 67.0  | 8.13 | 49.52  | RecName: Full=Complement component C8 beta chain; AltName: Full=Complement component 8 subunit beta; Flags: Precursor                                                                                                                                                                           |

|             |       |    |   |       |      |        |                                                                                                                                                                                                       |
|-------------|-------|----|---|-------|------|--------|-------------------------------------------------------------------------------------------------------------------------------------------------------------------------------------------------------|
| gi114152793 | 6.09  | 15 | 3 | 105.2 | 5.71 | 70.38  | RecName: Full=Catenin alpha-2; AltName: Full=Alpha N-catenin; AltName: Full=Alpha-catenin-related protein                                                                                             |
| gi97535708  | 2.25  | 14 | 3 | 311.5 | 7.80 | 111.21 | RecName: Full=Adenomatous polyposis coli protein; Short=Protein APC; AltName: Full=Deleted in polyposis 2.5                                                                                           |
| gi7662244   | 3.31  | 14 | 3 | 138.5 | 6.87 | 77.81  | E3 ubiquitin-protein ligase DZIP3 [Homo sapiens]                                                                                                                                                      |
| gi7438692   | 52.71 | 14 | 3 | 13.5  | 7.85 | 48.70  | Ig lambda chain precursor V-J region (clone mAB 67VL) - human (fragment)                                                                                                                              |
| gi136652    | 6.41  | 13 | 3 | 89.4  | 5.81 | 132.53 | RecName: Full=Nucleolar transcription factor 1; AltName: Full=Autoantigen NOR-90; AltName: Full=Upstream-binding factor 1; Short=UBF-1                                                                |
| gi542893    | 39.37 | 13 | 3 | 13.8  | 5.99 | 59.58  | Ig kappa chain V-J region - human                                                                                                                                                                     |
| gi41322910  | 1.40  | 12 | 3 | 512.3 | 5.77 | 138.85 | plectin isoform 1d [Homo sapiens]                                                                                                                                                                     |
| gi343197704 | 13.22 | 11 | 3 | 24.3  | 8.12 | 37.34  | Chain J, Influenza Hemagglutinin In Complex With A Neutralizing Antibody                                                                                                                              |
| gi313103962 | 3.10  | 10 | 3 | 128.7 | 6.62 | 44.55  | Chain B, Structure And Control Of The Actin Regulatory Wave Complex                                                                                                                                   |
| gi116241261 | 4.18  | 9  | 3 | 134.1 | 5.62 | 44.76  | RecName: Full=Plasma membrane calcium-transporting ATPase 3; Short=PMCA3; AltName: Full=Plasma membrane calcium ATPase isoform 3; AltName: Full=Plasma membrane calcium pump isoform 3                |
| gi484716    | 32.09 | 9  | 3 | 15.0  | 7.11 | 29.59  | Ig heavy chain V region (clone P3-69) - human (fragment)                                                                                                                                              |
| gi39932727  | 7.58  | 8  | 3 | 88.0  | 6.80 | 28.14  | RecName: Full=Arf-GAP with coiled-coil, ANK repeat and PH domain-containing protein 2; AltName: Full=Centaurin-beta-2; Short=Cnt-b2                                                                   |
| gi4504489   | 8.38  | 8  | 3 | 59.5  | 7.50 | 33.11  | histidine-rich glycoprotein precursor [Homo sapiens]                                                                                                                                                  |
| gi74752937  | 3.75  | 8  | 3 | 160.1 | 6.00 | 60.47  | RecName: Full=Kinesin-like protein KIF15; AltName: Full=Kinesin-like protein 2; Short=hKLP2; AltName: Full=Kinesin-like protein 7; AltName: Full=Serologically defined breast cancer antigen NY-BR-62 |
| gi160019039 | 4.08  | 8  | 3 | 138.4 | 6.15 | 61.03  | RecName: Full=Cytosolic carboxypeptidase 1; AltName: Full=ATP/GTP-binding protein 1; AltName: Full=Nervous system nuclear protein induced by axotomy protein 1 homolog                                |
| gi313104213 | 1.72  | 8  | 3 | 255.5 | 8.76 | 80.08  | RecName: Full=Neuron navigator 3; AltName: Full=Pore membrane and/or filament-interacting-like protein 1; AltName: Full=Steerin-3; AltName: Full=Unc-53 homolog 3; Short=unc53H3                      |
| gi188036111 | 11.80 | 8  | 3 | 41.6  | 6.18 | 22.45  | Chain B, Crystal Structure Of The Reactive Loop Cleaved Corticosteroid Binding Globulin Complexed With Cortisol                                                                                       |
| gi1589718   | 2.27  | 7  | 3 | 301.2 | 7.43 | 79.54  | FRP1 protein                                                                                                                                                                                          |
| gi422957    | 35.43 | 7  | 3 | 13.8  | 9.29 | 24.85  | Ig heavy chain V region - human                                                                                                                                                                       |
| gi23821814  | 3.34  | 6  | 3 | 220.1 | 7.30 | 47.29  | RecName: Full=NFX1-type zinc finger-containing protein 1                                                                                                                                              |

|             |       |     |   |        |      |        |                                                                                                                                                                                                                                                                                 |
|-------------|-------|-----|---|--------|------|--------|---------------------------------------------------------------------------------------------------------------------------------------------------------------------------------------------------------------------------------------------------------------------------------|
| gi188595687 | 2.34  | 6   | 3 | 287.1  | 5.97 | 42.64  | filamin-C isoform b [Homo sapiens]                                                                                                                                                                                                                                              |
| gi311033390 | 5.50  | 5   | 3 | 123.3  | 7.17 | 29.90  | RecName: Full=Heat-stable enterotoxin receptor; Short=STA receptor; Short=hSTAR; AltName: Full=Guanylyl cyclase C; Short=GC-C; AltName: Full=Intestinal guanylate cyclase; Flags: Precursor                                                                                     |
| gi1589554   | 2.02  | 5   | 3 | 261.0  | 5.39 | 203.31 | peripheral membrane protein p230                                                                                                                                                                                                                                                |
| gi308153558 | 0.97  | 5   | 3 | 564.2  | 6.07 | 179.33 | RecName: Full=Ryanodine receptor 2; Short=RYP-2; Short=RyR2; Short=hRYP-2; AltName: Full=Cardiac muscle ryanodine receptor-calcium release channel; AltName: Full=Cardiac muscle-type ryanodine receptor                                                                        |
| gi257051067 | 0.50  | 5   | 3 | 1010.4 | 5.53 | 215.97 | RecName: Full=Nesprin-1; AltName: Full=Enaptin; AltName: Full=Myocyte nuclear envelope protein 1; Short=Myne-1; AltName: Full=Nuclear envelope spectrin repeat protein 1; AltName: Full=Synaptic nuclear envelope protein 1; Short=Syne-1                                       |
| gi296434460 | 3.07  | 5   | 3 | 133.4  | 6.21 | 60.16  | RecName: Full=Centrosomal protein of 135 kDa; Short=Cep135; AltName: Full=Centrosomal protein 4                                                                                                                                                                                 |
| gi27477041  | 3.30  | 5   | 3 | 103.9  | 6.96 | 32.94  | AP-2 complex subunit alpha-2 isoform 2 [Homo sapiens]                                                                                                                                                                                                                           |
| gi281185484 | 1.47  | 4   | 3 | 217.0  | 7.37 | 35.70  | RecName: Full=DNA-directed RNA polymerase II subunit RPB1; Short=RNA polymerase II subunit B1; AltName: Full=DNA-directed RNA polymerase II subunit A; AltName: Full=DNA-directed RNA polymerase III largest subunit; AltName: Full=RNA-directed RNA polymerase II subunit RPB1 |
| gi10438880  | 10.28 | 4   | 3 | 53.2   | 8.47 | 13.02  | unnamed protein product [Homo sapiens]                                                                                                                                                                                                                                          |
| gi14424438  | 1.43  | 3   | 3 | 384.0  | 6.73 | 106.35 | RecName: Full=Breast cancer type 2 susceptibility protein; AltName: Full=Fanconi anemia group D1 protein                                                                                                                                                                        |
| gi87901     | 25.34 | 184 | 2 | 15.5   | 7.85 | 288.61 | Ig lambda chain V-IV region - human (tentative sequence) (fragments)                                                                                                                                                                                                            |
| gi157838248 | 9.00  | 172 | 2 | 23.1   | 6.77 | 514.72 | Chain A, Crystal Structure Of A Chimeric Fab' Fragment Of An Antibody Binding Tumour Cells                                                                                                                                                                                      |
| gi48428276  | 2.08  | 122 | 2 | 176.5  | 5.38 | 257.56 | RecName: Full=Eukaryotic translation initiation factor 4 gamma 3; Short=eIF-4-gamma 3; Short=eIF-4G 3; Short=eIF4G 3; AltName: Full=eIF-4-gamma II; Short=eIF4GII                                                                                                               |
| gi284189    | 30.61 | 120 | 2 | 10.5   | 7.99 | 163.55 | Ig heavy chain V region (DP-32) - human (fragment)                                                                                                                                                                                                                              |
| gi106518    | 20.00 | 120 | 2 | 12.2   | 8.31 | 172.67 | Ig heavy chain V region (VH26-DN1-JH4) - human                                                                                                                                                                                                                                  |
| gi284190    | 30.61 | 119 | 2 | 10.8   | 6.00 | 170.55 | Ig heavy chain V region (DP-33) - human (fragment)                                                                                                                                                                                                                              |
| gi346147    | 37.93 | 118 | 2 | 6.5    | 9.38 | 157.74 | Ig heavy chain V region - human (fragment)                                                                                                                                                                                                                                      |
| gi2654034   | 15.07 | 118 | 2 | 15.4   | 9.47 | 166.54 | variable immunoglobulin anti-HLA heavy chain [Homo sapiens]                                                                                                                                                                                                                     |

|             |        |     |   |       |      |        |                                                                                                                         |
|-------------|--------|-----|---|-------|------|--------|-------------------------------------------------------------------------------------------------------------------------|
| gi773612    | 21.43  | 101 | 2 | 13.6  | 8.46 | 147.15 | immunoglobulin mu heavy chain [Homo sapiens]                                                                            |
| gi347447734 | 4.17   | 80  | 2 | 79.4  | 8.10 | 250.23 | Chain A, Structural Basis For Rna Recognition And Activation Of Rig-I                                                   |
| gi305677614 | 23.56  | 79  | 2 | 20.0  | 5.44 | 65.50  | Chain A, Crystal Structure Of Rbp4 Bound To Oleic Acid                                                                  |
| gi333944426 | 12.82  | 70  | 2 | 24.7  | 6.16 | 280.40 | Chain I, Crystal Structure Of Fab Of Rhesus Mab 2.5b Specific For Quaternary Neutralizing Epitope Of Hiv-1 Gp120        |
| gi198443200 | 11.67  | 70  | 2 | 27.1  | 9.01 | 137.90 | Chain F, Crystal Structure Of Mt-Sp1 In Complex With Fab Inhibitor E2                                                   |
| gi765288    | 22.22  | 70  | 2 | 14.5  | 5.36 | 106.09 | IgG heavy chain variable region=VH26 homolog [human, multiple myeloma patient VD, bone marrow, Peptide Partial, 135 aa] |
| gi87833     | 17.32  | 69  | 2 | 13.8  | 8.46 | 188.20 | Ig heavy chain V region (N42P3) - human (fragment)                                                                      |
| gi119703746 | 5.67   | 62  | 2 | 68.5  | 7.55 | 156.66 | electron transfer flavoprotein-ubiquinone oxidoreductase, mitochondrial precursor [Homo sapiens]                        |
| gi2135447   | 35.79  | 60  | 2 | 10.3  | 7.12 | 99.47  | Ig kappa chain V region (clone RFSJ5L), rheumatoid factor - human                                                       |
| gi7438758   | 15.71  | 58  | 2 | 15.3  | 7.09 | 155.23 | Ig heavy chain precursor V region (0-81VH) - human (fragment)                                                           |
| gi116242615 | 11.02  | 56  | 2 | 53.3  | 6.70 | 61.65  | RecName: Full=Lipopolysaccharide-binding protein; Short=LBP; Flags: Precursor                                           |
| gi310942619 | 31.78  | 55  | 2 | 11.6  | 8.48 | 86.26  | Chain B, The Crystal Structure Of Pcsk9 In Complex With 1d05 Fab                                                        |
| gi106611    | 40.74  | 55  | 2 | 11.5  | 7.96 | 91.09  | Ig kappa chain V-III region (Sca) - human (fragment)                                                                    |
| gi1041910   | 100.00 | 53  | 2 | 2.2   | 4.07 | 103.93 | GP120, IHRP=ITI heavy chain-related protein {internal fragment} [human, plasma, Peptide Partial, 19 aa]                 |
| gi58535451  | 1.80   | 52  | 2 | 214.9 | 5.58 | 382.29 | CDK5 regulatory subunit-associated protein 2 isoform a [Homo sapiens]                                                   |
| gi87908     | 35.79  | 52  | 2 | 10.4  | 4.53 | 74.01  | Ig kappa chain V region (anti-DNA, III-3R) - human (fragment)                                                           |
| gi226887759 | 15.89  | 51  | 2 | 23.4  | 8.05 | 79.76  | Chain A, Crystal Structure The Fab Fragment Of Efalizumab In Complex With Lfa-1 I Domain, Form I                        |
| gi10835402  | 32.08  | 51  | 2 | 11.5  | 8.47 | 89.14  | Chain L, Crystal Structure Of An Unliganded (Native) Fv From A Human Igm Anti-Peptide Antibody                          |
| gi486875    | 31.78  | 51  | 2 | 11.5  | 7.96 | 77.86  | Ig lambda chain V region (clone alpha-TNF-A1) - human (fragment)                                                        |
| gi226595    | 29.31  | 51  | 2 | 12.4  | 9.20 | 79.58  | Ig V kappa,anti-DNA                                                                                                     |
| gi49457476  | 28.69  | 46  | 2 | 13.5  | 6.79 | 112.55 | SAA1 [Homo sapiens]                                                                                                     |
| gi106549    | 51.14  | 43  | 2 | 9.4   | 8.47 | 95.35  | Ig kappa chain V region - human (fragment)                                                                              |
| gi87906     | 28.42  | 40  | 2 | 10.3  | 6.48 | 90.23  | Ig kappa chain V region (anti-DNA, II-1) - human (fragment)                                                             |
| gi337748    | 28.69  | 39  | 2 | 13.5  | 6.79 | 88.66  | human serum amyloid A [Homo sapiens]                                                                                    |
| gi260064050 | 13.11  | 37  | 2 | 47.9  | 6.10 | 44.52  | alpha-2-antiplasmin isoform b precursor [Homo sapiens]                                                                  |
| gi33413425  | 1.66   | 36  | 2 | 175.9 | 6.96 | 266.54 | trinucleotide repeat-containing gene 6C protein isoform 2 [Homo sapiens]                                                |



|             |       |    |   |       |      |        |                                                                                                                                                                                                                                                                                                                                                                                                                                                                                                                                                           |
|-------------|-------|----|---|-------|------|--------|-----------------------------------------------------------------------------------------------------------------------------------------------------------------------------------------------------------------------------------------------------------------------------------------------------------------------------------------------------------------------------------------------------------------------------------------------------------------------------------------------------------------------------------------------------------|
| gi93278682  | 23.94 | 36 | 2 | 23.4  | 7.27 | 30.09  | Chain E, Crystal Structure Of A Cross-Reactive Hiv-1 Neutralizing Cd4-Binding Site Antibody Fab M18                                                                                                                                                                                                                                                                                                                                                                                                                                                       |
| gi284185    | 30.00 | 33 | 2 | 11.0  | 8.46 | 140.67 | Ig heavy chain V region (DP-29) - human (fragment)                                                                                                                                                                                                                                                                                                                                                                                                                                                                                                        |
| gi2661071   | 5.71  | 32 | 2 | 31.2  | 7.53 | 213.34 | similar to 26S proteasome subunit p45 [Homo sapiens]                                                                                                                                                                                                                                                                                                                                                                                                                                                                                                      |
| gi284247    | 24.79 | 30 | 2 | 13.4  | 9.07 | 118.00 | Ig heavy chain V region - human                                                                                                                                                                                                                                                                                                                                                                                                                                                                                                                           |
| gi281185512 | 5.42  | 29 | 2 | 77.8  | 7.77 | 50.56  | RecName: Full=Protein kinase C eta type; AltName: Full=PKC-L; AltName: Full=nPKC-eta                                                                                                                                                                                                                                                                                                                                                                                                                                                                      |
| gi482003    | 19.23 | 29 | 2 | 14.2  | 7.97 | 90.35  | Ig kappa chain - human                                                                                                                                                                                                                                                                                                                                                                                                                                                                                                                                    |
| gi480866    | 12.61 | 28 | 2 | 13.3  | 8.81 | 57.22  | Ig mu chain - human (fragment)                                                                                                                                                                                                                                                                                                                                                                                                                                                                                                                            |
| gi773590    | 31.48 | 28 | 2 | 11.7  | 6.00 | 109.38 | immunoglobulin kappa light chain [Homo sapiens]                                                                                                                                                                                                                                                                                                                                                                                                                                                                                                           |
| gi189181720 | 3.08  | 25 | 2 | 146.4 | 9.61 | 28.19  | proteoglycan 4 isoform B [Homo sapiens]                                                                                                                                                                                                                                                                                                                                                                                                                                                                                                                   |
| gi224471885 | 2.36  | 24 | 2 | 177.5 | 5.12 | 129.01 | RecName: Full=Laminin subunit gamma-1; AltName: Full=Laminin B2 chain; AltName: Full=Laminin-1 subunit gamma; AltName: Full=Laminin-10 subunit gamma; AltName: Full=Laminin-11 subunit gamma; AltName: Full=Laminin-2 subunit gamma; AltName: Full=Laminin-3 subunit gamma; AltName: Full=Laminin-4 subunit gamma; AltName: Full=Laminin-6 subunit gamma; AltName: Full=Laminin-7 subunit gamma; AltName: Full=Laminin-8 subunit gamma; AltName: Full=Laminin-9 subunit gamma; AltName: Full=S-laminin subunit gamma; Short=S-LAM gamma; Flags: Precursor |
| gi106454    | 19.01 | 24 | 2 | 13.0  | 7.99 | 53.64  | Ig heavy chain V region - human                                                                                                                                                                                                                                                                                                                                                                                                                                                                                                                           |
| gi8569517   | 34.41 | 23 | 2 | 10.8  | 7.03 | 37.75  | Chain B, Migration Inhibitory Factor-Related Protein 8 From Human                                                                                                                                                                                                                                                                                                                                                                                                                                                                                         |
| gi20141464  | 8.28  | 23 | 2 | 38.4  | 6.61 | 69.73  | RecName: Full=Lumican; AltName: Full=Keratan sulfate proteoglycan lumican; Short=KSPG lumican; Flags: Precursor                                                                                                                                                                                                                                                                                                                                                                                                                                           |
| gi1699209   | 25.00 | 23 | 2 | 11.8  | 9.35 | 63.90  | WRI-176=anti-DNA IgM monoclonal autoantibody light chain variable region {CDR region} [human, splenocytes, SLE patient, Peptide Partial, 108 aa]                                                                                                                                                                                                                                                                                                                                                                                                          |
| gi481341    | 28.57 | 23 | 2 | 11.2  | 7.90 | 58.33  | Ig heavy chain - human (fragment)                                                                                                                                                                                                                                                                                                                                                                                                                                                                                                                         |
| gi87826     | 22.92 | 23 | 2 | 10.5  | 8.94 | 54.47  | Ig heavy chain V region (anti-DNA, I-2a) - human (fragment)                                                                                                                                                                                                                                                                                                                                                                                                                                                                                               |
| gi480926    | 27.17 | 22 | 2 | 10.0  | 9.25 | 87.51  | Ig kappa chain V region (V-kappa 3) - human (fragment)                                                                                                                                                                                                                                                                                                                                                                                                                                                                                                    |
| gi116667259 | 12.55 | 21 | 2 | 26.4  | 9.01 | 77.64  | Chain D, Crystal Structure Of Sars Spike Protein Receptor Binding Domain In Complex With A Neutralizing Antibody, 80r                                                                                                                                                                                                                                                                                                                                                                                                                                     |
| gi346100    | 27.45 | 21 | 2 | 11.2  | 8.60 | 41.20  | Ig heavy chain V region (clone VERG4) - human (fragment)                                                                                                                                                                                                                                                                                                                                                                                                                                                                                                  |
| gi346083    | 30.39 | 21 | 2 | 11.2  | 7.81 | 40.93  | Ig heavy chain V region (clone CORD6) - human (fragment)                                                                                                                                                                                                                                                                                                                                                                                                                                                                                                  |
| gi1082214   | 28.57 | 21 | 2 | 11.0  | 4.96 | 15.87  | anti-Sm antibody VL chain (V lambda 3b/J lambda 2/3) - human                                                                                                                                                                                                                                                                                                                                                                                                                                                                                              |

|             |       |    |   |       |      |        |                                                                                                                                                                                                                  |
|-------------|-------|----|---|-------|------|--------|------------------------------------------------------------------------------------------------------------------------------------------------------------------------------------------------------------------|
| gi480919    | 27.17 | 21 | 2 | 10.0  | 9.29 | 89.77  | Ig kappa chain V region (V-kappa 3) - human (fragment)                                                                                                                                                           |
| gi296439280 | 3.08  | 20 | 2 | 135.3 | 5.99 | 50.76  | RecName: Full=PAB-dependent poly(A)-specific ribonuclease subunit 2; Short=hPan2; AltName: Full=Inactive ubiquitin carboxyl-terminal hydrolase 52                                                                |
| gi106559    | 28.74 | 20 | 2 | 9.4   | 8.02 | 80.59  | Ig kappa chain V region - human (fragment)                                                                                                                                                                       |
| gi58424195  | 44.86 | 20 | 2 | 11.8  | 7.96 | 42.96  | rheumatoid factor [Homo sapiens]                                                                                                                                                                                 |
| gi93279222  | 10.20 | 19 | 2 | 25.9  | 7.81 | 117.36 | Chain H, Crystal Structure Of Sars-Cov Spike Receptor-Binding Domain Complexed With Neutralizing Antibody                                                                                                        |
| gi296439330 | 2.76  | 18 | 2 | 88.4  | 9.16 | 122.70 | RecName: Full=Serine/threonine-protein kinase haspin; AltName: Full=Germ cell-specific gene 2 protein; AltName: Full=H-haspin; AltName: Full=Haploid germ cell-specific nuclear protein kinase                   |
| gi298237    | 7.80  | 17 | 2 | 52.5  | 6.27 | 51.68  | apolipoprotein-J, Apo-J, SP-40,40=plasma glycoprotein/complement system hemolysis modulator [human, seminal plasma, Peptide, 449 aa]                                                                             |
| gi480922    | 27.17 | 17 | 2 | 10.0  | 9.29 | 59.07  | Ig kappa chain V region (V-kappa 3) - human (fragment)                                                                                                                                                           |
| gi480917    | 26.88 | 17 | 2 | 10.2  | 9.25 | 61.59  | Ig kappa chain V region (V-kappa 3) - human (fragment)                                                                                                                                                           |
| gi170784817 | 7.20  | 16 | 2 | 71.1  | 6.44 | 79.55  | grainyhead-like protein 2 homolog [Homo sapiens]                                                                                                                                                                 |
| gi107596    | 22.39 | 16 | 2 | 14.9  | 8.85 | 41.08  | Ig heavy chain V region precursor - human (fragment)                                                                                                                                                             |
| gi477475    | 30.61 | 16 | 2 | 10.7  | 8.63 | 51.91  | Ig heavy chain V7 region (element 4d275a) - human (fragment)                                                                                                                                                     |
| gi149242793 | 6.58  | 16 | 2 | 40.7  | 6.90 | 30.67  | Chain C, Human Pyruvate Dehydrogenase S264e Variant                                                                                                                                                              |
| gi186972736 | 35.44 | 16 | 2 | 8.8   | 4.88 | 37.18  | Chain A, Structure And Dynamics Of Human Apolipoprotein C-Iii                                                                                                                                                    |
| gi284238    | 25.00 | 16 | 2 | 13.0  | 8.44 | 50.33  | Ig heavy chain V region - human                                                                                                                                                                                  |
| gi631234    | 22.94 | 16 | 2 | 12.0  | 8.31 | 58.49  | Ig kappa chain - human                                                                                                                                                                                           |
| gi422903    | 46.46 | 16 | 2 | 10.2  | 5.17 | 27.61  | Ig lambda chain - human (fragment)                                                                                                                                                                               |
| gi346171    | 31.19 | 16 | 2 | 11.9  | 8.84 | 34.55  | Ig kappa chain - human (fragment)                                                                                                                                                                                |
| gi49168520  | 5.76  | 15 | 2 | 63.1  | 7.36 | 25.97  | PDPK1 [Homo sapiens]                                                                                                                                                                                             |
| gi311033375 | 0.99  | 15 | 2 | 460.9 | 6.00 | 142.55 | RecName: Full=Dynein heavy chain 7, axonemal; AltName: Full=Axonemal beta dynein heavy chain 7; AltName: Full=Ciliary dynein heavy chain 7; AltName: Full=Dynein heavy chain-like protein 2; AltName: Full=hDHC2 |
| gi48425724  | 7.83  | 15 | 2 | 38.2  | 6.80 | 68.07  | Chain F, Structure Of Human Transferrin Receptor-Transferrin Complex                                                                                                                                             |
| gi21466103  | 12.14 | 15 | 2 | 23.0  | 5.39 | 97.40  | Chain J, Crystal Structure Of Calcium-Depleted Human C-Reactive Protein From Perfectly Twinned Data                                                                                                              |
| gi87819     | 18.80 | 15 | 2 | 12.7  | 8.65 | 19.99  | Ig heavy chain precursor V-III region (Ab25) - human                                                                                                                                                             |
| gi20150236  | 24.78 | 15 | 2 | 13.1  | 6.13 | 37.04  | Chain H, Crystal Structure Of The Mrp14 Complexed With Chaps                                                                                                                                                     |
| gi15988024  | 7.29  | 15 | 2 | 44.2  | 6.10 | 13.34  | Chain A, 2.85 A Crystal Structure Of Pedf                                                                                                                                                                        |

|             |       |    |   |       |      |        |                                                                                                                                                                                                                                                                                                                                     |
|-------------|-------|----|---|-------|------|--------|-------------------------------------------------------------------------------------------------------------------------------------------------------------------------------------------------------------------------------------------------------------------------------------------------------------------------------------|
| gi2506298   | 2.07  | 14 | 2 | 186.9 | 5.85 | 29.82  | RecName: Full=Clathrin heavy chain 2; AltName: Full=Clathrin heavy chain on chromosome 22; Short=CLH-22                                                                                                                                                                                                                             |
| gi183397136 | 2.74  | 14 | 2 | 101.9 | 6.11 | 55.24  | ubiquitin carboxyl-terminal hydrolase 20 [Homo sapiens]                                                                                                                                                                                                                                                                             |
| gi8134347   | 3.50  | 14 | 2 | 122.3 | 6.47 | 48.07  | RecName: Full=Mitotic checkpoint serine/threonine-protein kinase BUB1; Short=hBUB1; AltName: Full=BUB1A                                                                                                                                                                                                                             |
| gi791179    | 26.61 | 14 | 2 | 11.7  | 5.31 | 21.45  | immunoglobulin variable region used by the ITC63B lambda light chain (subgroup V lambda III) (anti-cytomeglovirus glycoprotein B (AD-1 epitope)) [Homo sapiens]                                                                                                                                                                     |
| gi4557257   | 3.04  | 13 | 2 | 140.0 | 6.99 | 25.30  | adenylate cyclase type 8 [Homo sapiens]                                                                                                                                                                                                                                                                                             |
| gi296439233 | 0.99  | 13 | 2 | 395.0 | 9.17 | 66.99  | RecName: Full=Myosin-XV; AltName: Full=Unconventional myosin-15                                                                                                                                                                                                                                                                     |
| gi221222521 | 0.73  | 13 | 2 | 541.0 | 6.49 | 66.54  | RecName: Full=Histone-lysine N-methyltransferase MLL3; AltName: Full=Homologous to ALR protein; AltName: Full=Lysine N-methyltransferase 2C; Short=KMT2C; AltName: Full=Myeloid/lymphoid or mixed-lineage leukemia protein 3                                                                                                        |
| gi4502443   | 1.17  | 13 | 2 | 306.6 | 6.32 | 104.89 | bullous pemphigoid antigen 1 isoform 1e precursor [Homo sapiens]                                                                                                                                                                                                                                                                    |
| gi317373591 | 1.62  | 13 | 2 | 294.5 | 7.49 | 59.33  | RecName: Full=Peroxisomal proliferator-activated receptor A-interacting complex 285 kDa protein; AltName: Full=ATP-dependent helicase PRIC285; AltName: Full=PPAR-alpha-interacting complex protein 285; AltName: Full=PPAR-gamma DNA-binding domain-interacting protein 1; Short=PDIP1; Short=PPAR-gamma DBD-interacting protein 1 |
| gi18641362  | 3.15  | 13 | 2 | 130.8 | 6.33 | 52.34  | receptor-type tyrosine-protein phosphatase C isoform 2 precursor [Homo sapiens]                                                                                                                                                                                                                                                     |
| gi110624787 | 1.89  | 13 | 2 | 192.6 | 7.25 | 57.37  | 5'-3' exoribonuclease 1 isoform b [Homo sapiens]                                                                                                                                                                                                                                                                                    |
| gi328877128 | 3.57  | 13 | 2 | 102.4 | 6.51 | 28.01  | Chain A, Crystal Structure Of The Soluble Domain Of Human Endoplasmic Reticulum Aminopeptidase 1 Erap1                                                                                                                                                                                                                              |
| gi480931    | 27.17 | 13 | 2 | 10.0  | 9.51 | 45.30  | Ig kappa chain V region (V-kappa 3) - human (fragment)                                                                                                                                                                                                                                                                              |
| gi106467    | 24.59 | 13 | 2 | 13.5  | 8.43 | 69.34  | Ig heavy chain V region - human                                                                                                                                                                                                                                                                                                     |
| gi225800    | 19.01 | 13 | 2 | 13.1  | 6.61 | 52.72  | rheumatoid factor BOR                                                                                                                                                                                                                                                                                                               |
| gi185814    | 22.12 | 13 | 2 | 12.3  | 8.48 | 57.83  | Ig kappa L-chain V-region precursor [Homo sapiens]                                                                                                                                                                                                                                                                                  |
| gi67782330  | 2.72  | 12 | 2 | 109.3 | 7.34 | 32.88  | trinucleotide repeat-containing gene 6B protein isoform 3 [Homo sapiens]                                                                                                                                                                                                                                                            |
| gi62912466  | 11.16 | 12 | 2 | 28.3  | 5.14 | 10.67  | C4b-binding protein beta chain isoform 2 precursor [Homo sapiens]                                                                                                                                                                                                                                                                   |
| gi66346676  | 1.21  | 12 | 2 | 347.5 | 6.16 | 154.53 | vacuolar protein sorting-associated protein 13A isoform D [Homo sapiens]                                                                                                                                                                                                                                                            |
| gi114155142 | 1.06  | 12 | 2 | 267.1 | 5.02 | 90.81  | nucleoprotein TPR [Homo sapiens]                                                                                                                                                                                                                                                                                                    |

|             |       |    |   |       |      |        |                                                                                                                                                                                                                                                                                                                                                          |
|-------------|-------|----|---|-------|------|--------|----------------------------------------------------------------------------------------------------------------------------------------------------------------------------------------------------------------------------------------------------------------------------------------------------------------------------------------------------------|
| gi317373598 | 0.95  | 12 | 2 | 399.5 | 7.02 | 311.69 | RecName: Full=Laminin subunit alpha-5; AltName: Full=Laminin-10 subunit alpha; AltName: Full=Laminin-11 subunit alpha; AltName: Full=Laminin-15 subunit alpha; Flags: Precursor                                                                                                                                                                          |
| gi93278683  | 13.16 | 12 | 2 | 24.4  | 8.88 | 76.53  | Chain F, Crystal Structure Of A Cross-Reactive Hiv-1 Neutralizing Cd4-Binding Site Antibody Fab M18                                                                                                                                                                                                                                                      |
| gi1839327   | 22.03 | 12 | 2 | 12.7  | 9.26 | 57.86  | anti-VLDL receptor Ig VH chain, scFv7 heavy chain {fragment scFv7} [human, Peptide Recombinant Partial, 118 aa]                                                                                                                                                                                                                                          |
| gi765289    | 22.56 | 12 | 2 | 14.9  | 8.79 | 50.44  | IgG heavy chain variable region=HHG19G homolog [human, multiple myeloma patient BO, bone marrow, Peptide Partial, 133 aa]                                                                                                                                                                                                                                |
| gi27573693  | 10.65 | 12 | 2 | 50.1  | 6.15 | 21.20  | Chain B, Crystal Structure Of Human Liver 6-Phosphofructo-2- KinaseFRUCTOSE-2,6-Bisphosphatase                                                                                                                                                                                                                                                           |
| gi484973    | 24.32 | 12 | 2 | 11.9  | 6.60 | 26.24  | Ig kappa chain V region (clone LUNm03) - human (fragment)                                                                                                                                                                                                                                                                                                |
| gi10437028  | 16.80 | 12 | 2 | 28.9  | 9.47 | 32.10  | unnamed protein product [Homo sapiens]                                                                                                                                                                                                                                                                                                                   |
| gi38327039  | 3.57  | 11 | 2 | 94.3  | 5.19 | 66.74  | heat shock 70 kDa protein 4 [Homo sapiens]                                                                                                                                                                                                                                                                                                               |
| gi143811421 | 2.77  | 11 | 2 | 138.0 | 7.93 | 103.53 | RecName: Full=Multimerin-1; AltName: Full=EMILIN-4; AltName: Full=Elastin microfibril interface located protein 4; Short=Elastin microfibril interfacier 4; AltName: Full=Endothelial cell multimerin; Contains: RecName: Full=Platelet glycoprotein Ia*; Contains: RecName: Full=155 kDa platelet multimerin; Short=p-155; Short=p155; Flags: Precursor |
| gi189029946 | 1.76  | 11 | 2 | 219.5 | 8.07 | 67.84  | RecName: Full=Protein TANC2; AltName: Full=Tetratricopeptide repeat, ankyrin repeat and coiled-coil domain-containing protein 2                                                                                                                                                                                                                          |
| gi212276491 | 1.60  | 11 | 2 | 294.2 | 6.14 | 107.06 | RecName: Full=Ubiquitin carboxyl-terminal hydrolase 24; AltName: Full=Deubiquitinating enzyme 24; AltName: Full=Ubiquitin thiolesterase 24; AltName: Full=Ubiquitin-specific-processing protease 24                                                                                                                                                      |
| gi1082517   | 28.13 | 11 | 2 | 10.4  | 6.48 | 37.55  | Ig kappa chain V region - human (fragment)                                                                                                                                                                                                                                                                                                               |
| gi631262    | 20.93 | 11 | 2 | 13.9  | 8.46 | 36.48  | Ig heavy chain V region - human                                                                                                                                                                                                                                                                                                                          |
| gi308153685 | 5.90  | 10 | 2 | 70.2  | 5.43 | 18.56  | RecName: Full=Plastin-2; AltName: Full=L-plastin; AltName: Full=LC64P; AltName: Full=Lymphocyte cytosolic protein 1; Short=LCP-1                                                                                                                                                                                                                         |
| gi112421108 | 1.74  | 10 | 2 | 163.7 | 8.56 | 33.82  | protein capicua homolog [Homo sapiens]                                                                                                                                                                                                                                                                                                                   |
| gi126031548 | 5.50  | 10 | 2 | 57.4  | 6.92 | 24.71  | Chain A, Complement Component C2a, The Catalytic Fragment Of C3- And C5-Convertase Of Human Complement                                                                                                                                                                                                                                                   |
| gi87852     | 17.39 | 10 | 2 | 15.2  | 7.81 | 30.77  | Ig heavy chain V-III region (K5C7) - human                                                                                                                                                                                                                                                                                                               |
| gi299748    | 18.03 | 10 | 2 | 13.2  | 8.91 | 35.27  | anti-HIV-1 gp120 immunoglobulin G heavy chain variable region {clone s8} [human, bone marrow, Peptide Recombinant Partial, 122 aa]                                                                                                                                                                                                                       |

|             |       |    |   |       |      |        |                                                                                                                                                                                                                                                                                                           |
|-------------|-------|----|---|-------|------|--------|-----------------------------------------------------------------------------------------------------------------------------------------------------------------------------------------------------------------------------------------------------------------------------------------------------------|
| gi542872    | 23.28 | 10 | 2 | 12.7  | 5.25 | 34.13  | Ig kappa chain V region L10, allelic sequence - human                                                                                                                                                                                                                                                     |
| gi224527    | 14.76 | 9  | 2 | 30.6  | 5.20 | 16.11  | interleukin 1alpha                                                                                                                                                                                                                                                                                        |
| gi60390262  | 3.91  | 9  | 2 | 73.4  | 6.20 | 33.62  | RecName: Full=Poly(A)-specific ribonuclease PARN; AltName: Full=Deadenylating nuclease; AltName: Full=Deadenylation nuclease; AltName: Full=Polyadenylate-specific ribonuclease                                                                                                                           |
| gi74747795  | 3.45  | 9  | 2 | 83.6  | 7.05 | 148.89 | RecName: Full=N-alpha-acetyltransferase 35, NatC auxiliary subunit; AltName: Full=Embryonic growth-associated protein homolog; AltName: Full=Protein MAK10 homolog                                                                                                                                        |
| gi92090617  | 1.93  | 9  | 2 | 194.2 | 6.37 | 37.21  | RecName: Full=Serine/threonine-protein kinase MRCK beta; AltName: Full=CDC42-binding protein kinase beta; Short=CDC42BP-beta; AltName: Full=DMPK-like beta; AltName: Full=Myotonic dystrophy kinase-related CDC42-binding kinase beta; Short=MRCK beta; Short=Myotonic dystrophy protein kinase-like beta |
| gi296453001 | 2.90  | 9  | 2 | 112.6 | 8.53 | 48.41  | RecName: Full=Serine/threonine-protein kinase ULK2; AltName: Full=Unc-51-like kinase 2                                                                                                                                                                                                                    |
| gi87918     | 22.50 | 9  | 2 | 13.0  | 8.62 | 64.30  | Ig mu chain precursor V region mu F7 - human (fragment)                                                                                                                                                                                                                                                   |
| gi153218654 | 10.19 | 9  | 2 | 42.1  | 7.03 | 21.40  | cholesterol side-chain cleavage enzyme, mitochondrial isoform b [Homo sapiens]                                                                                                                                                                                                                            |
| gi87788     | 23.08 | 9  | 2 | 13.0  | 9.36 | 80.87  | Ig gamma chain precursor V region (gamma F1) - human (fragment)                                                                                                                                                                                                                                           |
| gi478653    | 16.11 | 9  | 2 | 15.4  | 6.51 | 30.37  | Ig lambda chain V region - human (fragment)                                                                                                                                                                                                                                                               |
| gi10438787  | 5.88  | 9  | 2 | 39.2  | 7.71 | 102.67 | unnamed protein product [Homo sapiens]                                                                                                                                                                                                                                                                    |
| gi49456353  | 18.03 | 8  | 2 | 27.2  | 5.78 | 30.16  | CRSP9 [Homo sapiens]                                                                                                                                                                                                                                                                                      |
| gi22256936  | 3.99  | 8  | 2 | 103.1 | 4.78 | 54.15  | RecName: Full=Protein Niban; AltName: Full=Cell growth-inhibiting gene 39 protein; AltName: Full=Protein FAM129A                                                                                                                                                                                          |
| gi334302843 | 4.00  | 8  | 2 | 97.4  | 4.96 | 8.88   | RecName: Full=Serine/threonine-protein phosphatase 4 regulatory subunit 3B; AltName: Full=SMEK homolog 2                                                                                                                                                                                                  |
| gi146286062 | 1.86  | 8  | 2 | 226.2 | 8.13 | 84.01  | RecName: Full=Zinc finger C3H1 domain-containing protein; AltName: Full=Coiled-coil domain-containing protein 131; AltName: Full=Proline/serine-rich coiled-coil protein 2                                                                                                                                |
| gi49168646  | 8.16  | 8  | 2 | 49.0  | 6.25 | 41.51  | SGKL [Homo sapiens]                                                                                                                                                                                                                                                                                       |
| gi2781002   | 10.78 | 8  | 2 | 23.2  | 6.54 | 16.59  | Chain E, Decameric Damp Complex Of Human Serum Amyloid P Component                                                                                                                                                                                                                                        |
| gi631235    | 31.48 | 8  | 2 | 11.6  | 8.47 | 27.31  | Ig kappa chain - human                                                                                                                                                                                                                                                                                    |
| gi153792663 | 1.60  | 7  | 2 | 222.9 | 5.82 | 57.88  | myosin-2 [Homo sapiens]                                                                                                                                                                                                                                                                                   |
| gi4826690   | 2.54  | 7  | 2 | 139.2 | 8.32 | 28.83  | ATP-dependent RNA helicase DHX8 [Homo sapiens]                                                                                                                                                                                                                                                            |
| gi182639267 | 4.63  | 7  | 2 | 80.6  | 7.05 | 41.21  | RecName: Full=Mitochondrial intermediate peptidase; Short=MIP; Flags: Precursor                                                                                                                                                                                                                           |

|             |       |   |   |       |      |       |                                                                                                                                                                                                                                                                                                                                                                |
|-------------|-------|---|---|-------|------|-------|----------------------------------------------------------------------------------------------------------------------------------------------------------------------------------------------------------------------------------------------------------------------------------------------------------------------------------------------------------------|
| gi60390864  | 2.87  | 7 | 2 | 113.9 | 8.60 | 54.37 | RecName: Full=Helicase-like transcription factor; AltName: Full=DNA-binding protein/plasminogen activator inhibitor 1 regulator; AltName: Full=HIP116; AltName: Full=RING finger protein 80; AltName: Full=SWI/SNF-related matrix-associated actin-dependent regulator of chromatin subfamily A member 3; AltName: Full=Sucrose nonfermenting protein 2-like 3 |
| gi50845416  | 1.95  | 7 | 2 | 191.7 | 5.67 | 13.47 | serine/threonine-protein kinase WNK3 isoform 2 [Homo sapiens]                                                                                                                                                                                                                                                                                                  |
| gi296452982 | 1.66  | 7 | 2 | 211.9 | 7.15 | 76.23 | RecName: Full=Plexin-D1; Flags: Precursor                                                                                                                                                                                                                                                                                                                      |
| gi322510117 | 7.81  | 7 | 2 | 49.3  | 6.67 | 13.71 | RecName: Full=Leukocyte immunoglobulin-like receptor subfamily B member 4; AltName: Full=CD85 antigen-like family member K; AltName: Full=Immunoglobulin-like transcript 3; Short=ILT-3; AltName: Full=Leukocyte immunoglobulin-like receptor 5; Short=LIR-5; AltName: Full=Monocyte inhibitory receptor HM18; AltName: CD_antigen=CD85k; Flags: Precursor     |
| gi56417894  | 1.89  | 7 | 2 | 95.9  | 6.80 | 32.21 | RecName: Full=ATP-binding cassette subfamily F member 1; AltName: Full=ATP-binding cassette 50; AltName: Full=TNF-alpha-stimulated ABC protein                                                                                                                                                                                                                 |
| gi7439089   | 22.92 | 7 | 2 | 10.5  | 9.25 | 29.55 | Ig heavy chain V region - human (fragment)                                                                                                                                                                                                                                                                                                                     |
| gi449005    | 3.65  | 7 | 2 | 120.8 | 7.50 | 94.54 | p107 protein                                                                                                                                                                                                                                                                                                                                                   |
| gi1699416   | 3.01  | 7 | 2 | 118.8 | 9.22 | 41.93 | AF4=interleukin growth hormone homolog [human, placenta, Peptide Partial, 1098 aa]                                                                                                                                                                                                                                                                             |
| gi300313    | 25.00 | 7 | 2 | 21.4  | 6.73 | 22.23 | fibrinogen A alpha-chain [human, kidney, Peptide Partial Mutant, 200 aa]                                                                                                                                                                                                                                                                                       |
| gi480933    | 42.86 | 7 | 2 | 10.2  | 9.51 | 19.81 | Ig kappa chain V region (V-kappa 3) - human (fragment)                                                                                                                                                                                                                                                                                                         |
| gi3183544   | 4.72  | 6 | 2 | 70.6  | 9.50 | 22.92 | RecName: Full=Polyadenylate-binding protein 1; Short=PABP-1; Short=Poly(A)-binding protein 1                                                                                                                                                                                                                                                                   |
| gi29337005  | 2.47  | 6 | 2 | 141.5 | 7.18 | 72.72 | RecName: Full=Structural maintenance of chromosomes protein 3; Short=SMC protein 3; Short=SMC-3; AltName: Full=Basement membrane-associated chondroitin proteoglycan; Short=Bamacan; AltName: Full=Chondroitin sulfate proteoglycan 6; AltName: Full=Chromosome-associated polypeptide; Short=hCAP                                                             |

|             |      |   |   |       |      |       |                                                                                                                                                                                                                                                                                                                                                                                                                                                                                         |
|-------------|------|---|---|-------|------|-------|-----------------------------------------------------------------------------------------------------------------------------------------------------------------------------------------------------------------------------------------------------------------------------------------------------------------------------------------------------------------------------------------------------------------------------------------------------------------------------------------|
| gi134047802 | 3.22 | 6 | 2 | 116.6 | 5.52 | 32.24 | RecName: Full=Interferon-induced helicase C domain-containing protein 1; AltName: Full=Clinically amyopathic dermatomyositis autoantigen 140 kDa; Short=CADM-140 autoantigen; AltName: Full=Helicase with 2 CARD domains; Short=Helicard; AltName: Full=Interferon-induced with helicase C domain protein 1; AltName: Full=Melanoma differentiation-associated protein 5; Short=MDA-5; AltName: Full=Murabutide down-regulated protein; AltName: Full=RNA helicase-DEAD box protein 116 |
| gi1709851   | 3.39 | 6 | 2 | 76.1  | 9.44 | 40.24 | RecName: Full=Splicing factor, proline- and glutamine-rich; AltName: Full=100 kDa DNA-pairing protein; Short=hPOMP100; AltName: Full=DNA-binding p52/p100 complex, 100 kDa subunit; AltName: Full=Polypyrimidine tract-binding protein-associated-splicing factor; Short=PSF; Short=PTB-associated-splicing factor                                                                                                                                                                      |
| gi122801    | 9.66 | 6 | 2 | 39.0  | 6.25 | 29.44 | RecName: Full=Protein AMBP; Contains: RecName: Full=Alpha-1-microglobulin; Short=Protein HC; AltName: Full=Alpha-1 microglycoprotein; AltName: Full=Complex-forming glycoprotein heterogeneous in charge; Contains: RecName: Full=Inter-alpha-trypsin inhibitor light chain; Short=ITI-LC; AltName: Full=Bikunin; AltName: Full=EDC1; AltName: Full=HI-30; AltName: Full=Uronic-acid-rich protein; Contains: RecName: Full=Trypstatin; Flags: Precursor                                 |
| gi11863152  | 2.17 | 6 | 2 | 138.6 | 9.38 | 59.11 | protein Jumonji [Homo sapiens]                                                                                                                                                                                                                                                                                                                                                                                                                                                          |
| gi68565853  | 6.04 | 6 | 2 | 60.1  | 9.13 | 79.03 | RecName: Full=PC4 and SFRS1-interacting protein; AltName: Full=CLL-associated antigen KW-7; AltName: Full=Dense fine speckles 70 kDa protein; Short=DFS 70; AltName: Full=Lens epithelium-derived growth factor; AltName: Full=Transcriptional coactivator p75/p52                                                                                                                                                                                                                      |
| gi1169735   | 1.14 | 6 | 2 | 288.7 | 7.17 | 72.83 | RecName: Full=Serine/threonine-protein kinase mTOR; AltName: Full=FK506-binding protein 12-rapamycin complex-associated protein 1; AltName: Full=FKBP12-rapamycin complex-associated protein; AltName: Full=Mammalian target of rapamycin; Short=mTOR; AltName: Full=Mechanistic target of rapamycin; AltName: Full=Rapamycin target protein 1; Short=RAPT1                                                                                                                             |
| gi51173724  | 7.78 | 6 | 2 | 49.6  | 8.12 | 16.82 | bystin [Homo sapiens]                                                                                                                                                                                                                                                                                                                                                                                                                                                                   |
| gi160332304 | 2.01 | 6 | 2 | 180.6 | 5.99 | 31.37 | RecName: Full=Protein unc-13 homolog B; AltName: Full=Munc13-2; Short=munc13                                                                                                                                                                                                                                                                                                                                                                                                            |

|             |       |   |   |       |      |        |                                                                                                                                                                                                                                                                                                       |
|-------------|-------|---|---|-------|------|--------|-------------------------------------------------------------------------------------------------------------------------------------------------------------------------------------------------------------------------------------------------------------------------------------------------------|
| gi338817979 | 8.89  | 6 | 2 | 30.9  | 5.11 | 12.90  | RecName: Full=Kv channel-interacting protein 2; Short=KChIP2; AltName: Full=A-type potassium channel modulatory protein 2; AltName: Full=Cardiac voltage-gated potassium channel modulatory subunit; AltName: Full=Potassium channel-interacting protein 2                                            |
| gi116242495 | 9.63  | 6 | 2 | 52.6  | 8.79 | 17.78  | RecName: Full=Glycine receptor subunit alpha-1; AltName: Full=Glycine receptor 48 kDa subunit; AltName: Full=Glycine receptor strychnine-binding subunit; Flags: Precursor                                                                                                                            |
| gi313104206 | 2.96  | 6 | 2 | 150.5 | 7.09 | 16.21  | RecName: Full=Palladin; AltName: Full=SIH002; AltName: Full=Sarcoma antigen NY-SAR-77                                                                                                                                                                                                                 |
| gi341942262 | 0.97  | 6 | 2 | 316.7 | 9.13 | 67.25  | RecName: Full=Protein PRRC2C; AltName: Full=BAT2 domain-containing protein 1; AltName: Full=HBV X-transactivated gene 2 protein; AltName: Full=HBV XAg-transactivated protein 2; AltName: Full=HLA-B-associated transcript 2-like 2; AltName: Full=Proline-rich and coiled-coil-containing protein 2C |
| gi546090    | 37.62 | 6 | 2 | 10.7  | 8.91 | 14.96  | immunoglobulin heavy chain associated amyloid protein [human, AH amyloidosis patient MAD, kidney, spleen, Peptide, 101 aa]                                                                                                                                                                            |
| gi1082874   | 4.71  | 6 | 2 | 85.4  | 7.77 | 66.20  | triacylglycerol lipase (EC 3.1.1.3), hormone-sensitive - human                                                                                                                                                                                                                                        |
| gi206729865 | 6.50  | 5 | 2 | 61.6  | 9.55 | 57.50  | RecName: Full=Gamma-aminobutyric acid receptor subunit alpha-4; AltName: Full=GABA(A) receptor subunit alpha-4; Flags: Precursor                                                                                                                                                                      |
| gi7706563   | 19.32 | 5 | 2 | 23.6  | 9.07 | 19.21  | ras-related protein Rab-8B [Homo sapiens]                                                                                                                                                                                                                                                             |
| gi148876773 | 3.94  | 5 | 2 | 122.2 | 5.24 | 21.80  | RecName: Full=Desmoglein-2; AltName: Full=Cadherin family member 5; AltName: Full=HDGC; Flags: Precursor                                                                                                                                                                                              |
| gi116242605 | 1.98  | 5 | 2 | 204.3 | 5.60 | 32.70  | RecName: Full=Kinesin-like protein KIF1B; Short=Klp                                                                                                                                                                                                                                                   |
| gi61216666  | 6.20  | 5 | 2 | 72.4  | 7.61 | 29.46  | RecName: Full=SURP and G-patch domain-containing protein 1; AltName: Full=RNA-binding protein RBP; AltName: Full=Splicing factor 4                                                                                                                                                                    |
| gi157738645 | 1.85  | 5 | 2 | 212.3 | 6.86 | 28.77  | plexin-A4 isoform 1 [Homo sapiens]                                                                                                                                                                                                                                                                    |
| gi23813990  | 4.14  | 5 | 2 | 86.0  | 5.95 | 29.55  | RecName: Full=Microprocessor complex subunit DGCR8; AltName: Full=DiGeorge syndrome critical region 8                                                                                                                                                                                                 |
| gi48255949  | 3.59  | 5 | 2 | 132.5 | 5.96 | 26.72  | plasma membrane calcium-transporting ATPase 2 isoform 2 [Homo sapiens]                                                                                                                                                                                                                                |
| gi306526240 | 3.51  | 5 | 2 | 117.3 | 5.55 | 102.86 | RecName: Full=SWI/SNF-related matrix-associated actin-dependent regulator of chromatin subfamily A containing DEAD/H box 1; AltName: Full=ATP-dependent helicase 1; Short=hHEL1                                                                                                                       |



|             |       |   |   |       |       |        |                                                                                                                                                                                                                               |
|-------------|-------|---|---|-------|-------|--------|-------------------------------------------------------------------------------------------------------------------------------------------------------------------------------------------------------------------------------|
| gi161789024 | 3.41  | 5 | 2 | 114.9 | 7.49  | 36.44  | RecName: Full=N-acetyl-beta-glucosaminyl-glycoprotein 4-beta-N-acetylgalactosaminyltransferase 2; Short=NGalNAc-T2; AltName: Full=Beta-1,4-N-acetylgalactosaminyltransferase III; Short=Beta4GalNAc-T3; Short=Beta4GalNAcT3   |
| gi25482496  | 14.62 | 5 | 2 | 14.9  | 10.74 | 13.27  | hypothetical protein DKFZp547I014.1 - human                                                                                                                                                                                   |
| gi4758502   | 5.36  | 5 | 2 | 62.6  | 6.54  | 19.45  | hyaluronan-binding protein 2 isoform 1 preproprotein [Homo sapiens]                                                                                                                                                           |
| gi300244501 | 3.98  | 5 | 2 | 94.8  | 9.38  | 21.01  | piwi-like protein 1 isoform 2 [Homo sapiens]                                                                                                                                                                                  |
| gi134034199 | 2.97  | 5 | 2 | 148.3 | 7.31  | 29.34  | RecName: Full=Cytoplasmic FMR1-interacting protein 2; AltName: Full=p53-inducible protein 121                                                                                                                                 |
| gi323668328 | 5.91  | 5 | 2 | 54.7  | 7.87  | 27.56  | tumor protein p73 isoform g [Homo sapiens]                                                                                                                                                                                    |
| gi20454882  | 20.63 | 5 | 2 | 14.5  | 9.13  | 13.44  | RecName: Full=Protein chibby homolog 1; AltName: Full=ARPP-binding protein; AltName: Full=Cytosolic leucine-rich protein; AltName: Full=PIGEA-14; AltName: Full=PKD2 interactor, Golgi and endoplasmic reticulum-associated 1 |
| gi219109303 | 5.47  | 5 | 2 | 64.2  | 6.67  | 18.35  | Chain S, Solution Structure Of Human Siga2                                                                                                                                                                                    |
| gi269914373 | 8.04  | 5 | 2 | 51.2  | 7.09  | 21.76  | Chain D, Crystal Structure Of Human Mitochondrial 3-Hydroxy-3- Methylglutaryl-Coenzyme A Synthase 2 (Hmgcs2)                                                                                                                  |
| gi256032526 | 3.23  | 5 | 2 | 114.3 | 6.46  | 34.47  | Chain B, Crystal Structure Of Human Insulin Degrading Enzyme In Complex With Insulin-Like Growth Factor Ii                                                                                                                    |
| gi7245805   | 3.82  | 5 | 2 | 56.5  | 7.20  | 19.31  | Chain D, Human Erythrocyte Catalase                                                                                                                                                                                           |
| gi5080756   | 0.88  | 5 | 2 | 301.6 | 5.29  | 19.32  | Human Fc gamma BP [AA 1-2843] [Homo sapiens]                                                                                                                                                                                  |
| gi422950    | 31.48 | 5 | 2 | 11.8  | 8.28  | 23.24  | Ig kappa chain V region - human                                                                                                                                                                                               |
| gi542860    | 21.32 | 5 | 2 | 15.0  | 8.25  | 19.98  | Ig heavy chain V region (clone HAN) - human (fragment)                                                                                                                                                                        |
| gi87902     | 35.79 | 5 | 2 | 10.4  | 8.00  | 20.22  | Ig kappa chain V region (anti-DNA, 1X7RG1) - human (fragment)                                                                                                                                                                 |
| gi14719519  | 9.25  | 5 | 2 | 41.0  | 8.78  | 12.10  | Chain A, Structure Of Isolated Ferm Domain And First Long Helix Of Moesin                                                                                                                                                     |
| gi313104240 | 1.03  | 4 | 2 | 426.5 | 5.88  | 103.88 | RecName: Full=Dystrophin                                                                                                                                                                                                      |
| gi8923870   | 7.45  | 4 | 2 | 59.9  | 8.62  | 54.40  | solute carrier family 22 member 11 [Homo sapiens]                                                                                                                                                                             |
| gi56404449  | 3.85  | 4 | 2 | 97.6  | 7.58  | 45.83  | RecName: Full=Nucleolar protein 14; AltName: Full=Nucleolar complex protein 14                                                                                                                                                |
| gi115527082 | 1.60  | 4 | 2 | 223.0 | 5.74  | 74.59  | myosin-1 [Homo sapiens]                                                                                                                                                                                                       |
| gi221222508 | 2.49  | 4 | 2 | 147.7 | 7.99  | 30.77  | RecName: Full=Zinc finger protein 541                                                                                                                                                                                         |
| gi12231019  | 2.41  | 4 | 2 | 183.0 | 7.75  | 63.68  | RecName: Full=DNA (cytosine-5)-methyltransferase 1; Short=Dnmt1; AltName: Full=CXXC-type zinc finger protein 9; AltName: Full=DNA methyltransferase HsaI; Short=DNA MTase HsaI; Short=M.HsaI; AltName: Full=MCMT              |
| gi238624188 | 2.30  | 4 | 2 | 151.1 | 5.17  | 54.87  | diffuse panbronchiolitis critical region protein 1 [Homo sapiens]                                                                                                                                                             |

|             |       |   |   |       |       |       |                                                                                                                                                                                            |
|-------------|-------|---|---|-------|-------|-------|--------------------------------------------------------------------------------------------------------------------------------------------------------------------------------------------|
| gi126302558 | 2.22  | 4 | 2 | 118.6 | 4.96  | 36.81 | RecName: Full=Importin-4; Short=Imp4; AltName: Full=Importin-4b; Short=Imp4b; AltName: Full=Ran-binding protein 4; Short=RanBP4                                                            |
| gi62512161  | 1.95  | 4 | 2 | 139.8 | 6.27  | 75.05 | RecName: Full=Chromosome-associated kinesin KIF4A; AltName: Full=Chromokinesin-A                                                                                                           |
| gi47717125  | 2.38  | 4 | 2 | 137.6 | 7.33  | 88.60 | intersectin-1 isoform ITSN-s [Homo sapiens]                                                                                                                                                |
| gi296452976 | 3.17  | 4 | 2 | 84.4  | 9.76  | 32.96 | RecName: Full=Ribosomal RNA processing protein 1 homolog B; AltName: Full=RRP1-like protein B                                                                                              |
| gi28558973  | 3.03  | 4 | 2 | 160.5 | 8.73  | 55.66 | mediator of RNA polymerase II transcription subunit 14 [Homo sapiens]                                                                                                                      |
| gi153945790 | 1.86  | 4 | 2 | 222.6 | 5.74  | 43.89 | myosin-8 [Homo sapiens]                                                                                                                                                                    |
| gi218511752 | 2.09  | 4 | 2 | 136.1 | 6.09  | 24.17 | RecName: Full=Period circadian protein homolog 1; Short=hPER1; AltName: Full=Circadian clock protein PERIOD 1; AltName: Full=Circadian pacemaker protein Rigi                              |
| gi90110027  | 5.38  | 4 | 2 | 53.7  | 5.59  | 34.68 | RecName: Full=Keratin, type II cytoskeletal 8; AltName: Full=Cytokeratin-8; Short=CK-8; AltName: Full=Keratin-8; Short=K8; AltName: Full=Type-II keratin Kb8                               |
| gi193083117 | 6.03  | 4 | 2 | 51.2  | 8.87  | 19.94 | 1,25-dihydroxyvitamin D(3) 24-hydroxylase, mitochondrial isoform 2 precursor [Homo sapiens]                                                                                                |
| gi343197082 | 6.89  | 4 | 2 | 51.8  | 6.51  | 19.46 | Chain C, Crystal Structure Of The Human Co-Chaperone P58(Ipk)                                                                                                                              |
| gi740021    | 1.86  | 4 | 2 | 199.0 | 4.92  | 27.04 | microtubule-associated protein 2                                                                                                                                                           |
| gi414367    | 7.95  | 4 | 2 | 62.0  | 9.44  | 19.09 | Lambert-Eaton myasthenic syndrome antigen, Mys B, LEMS antigen=Ca2+ channel complexes beta-subunit homolog [human, fetal brain, Peptide, 566 aa]                                           |
| gi34811374  | 26.32 | 4 | 2 | 15.2  | 10.04 | 19.14 | Chain F, Crystal Structure Of The 46kda Domain Of Human Cardiac Troponin In The Ca2+ Saturated Form                                                                                        |
| gi58176887  | 2.44  | 3 | 2 | 136.3 | 5.78  | 14.96 | Chain C, Crystal Structure Of The Cand1-Cul1-Roc1 Complex                                                                                                                                  |
| gi189046784 | 2.09  | 3 | 2 | 147.6 | 10.81 | 35.58 | RecName: Full=Protein SFI1 homolog; Short=hSFI1                                                                                                                                            |
| gi56405339  | 6.86  | 3 | 2 | 74.5  | 5.34  | 26.22 | RecName: Full=Methylenetetrahydrofolate reductase                                                                                                                                          |
| gi215273886 | 2.17  | 3 | 2 | 135.6 | 8.43  | 67.10 | RecName: Full=Structural maintenance of chromosomes protein 2; Short=SMC protein 2; Short=SMC-2; AltName: Full=Chromosome-associated protein E; Short=hCAP-E; AltName: Full=XCAP-E homolog |
| gi2811086   | 1.90  | 3 | 2 | 134.2 | 6.68  | 42.20 | RecName: Full=Epidermal growth factor receptor; AltName: Full=Proto-oncogene c-ErbB-1; AltName: Full=Receptor tyrosine-protein kinase erbB-1; Flags: Precursor                             |
| gi215273870 | 6.45  | 3 | 2 | 71.6  | 6.68  | 27.40 | RecName: Full=Protein regulator of cytokinesis 1                                                                                                                                           |

|             |       |   |   |       |      |        |                                                                                                                                                                                                                                                                                |
|-------------|-------|---|---|-------|------|--------|--------------------------------------------------------------------------------------------------------------------------------------------------------------------------------------------------------------------------------------------------------------------------------|
| gi166706903 | 5.57  | 3 | 2 | 67.9  | 6.32 | 11.36  | interferon-induced guanylate-binding protein 1 [Homo sapiens]                                                                                                                                                                                                                  |
| gi108773810 | 2.81  | 3 | 2 | 134.4 | 7.30 | 38.05  | leucyl-tRNA synthetase, cytoplasmic [Homo sapiens]                                                                                                                                                                                                                             |
| gi47115215  | 14.16 | 3 | 2 | 25.1  | 9.10 | 23.97  | RIT1 [Homo sapiens]                                                                                                                                                                                                                                                            |
| gi74762616  | 0.53  | 3 | 2 | 470.5 | 6.43 | 60.90  | RecName: Full=Dynein heavy chain 3, axonemal; AltName: Full=Axonemal beta dynein heavy chain 3; Short=HsADHC3; AltName: Full=Ciliary dynein heavy chain 3; AltName: Full=Dnahc3-b                                                                                              |
| gi226693503 | 5.52  | 3 | 2 | 61.1  | 6.25 | 5.58   | RecName: Full=Biotinidase; Short=Biotinase; Flags: Precursor                                                                                                                                                                                                                   |
| gi105131    | 2.18  | 3 | 2 | 172.5 | 6.71 | 37.35  | 4-alpha-glucanotransferase (EC 2.4.1.25) / amylo-1, 6-glucosidase (EC 3.2.1.33) - human                                                                                                                                                                                        |
| gi92110055  | 5.59  | 3 | 2 | 74.1  | 8.00 | 16.53  | histidine decarboxylase [Homo sapiens]                                                                                                                                                                                                                                         |
| gi317373586 | 0.89  | 3 | 2 | 290.3 | 6.47 | 38.61  | RecName: Full=Chromodomain-helicase-DNA-binding protein 8; Short=CHD-8; AltName: Full=ATP-dependent helicase CHD8; AltName: Full=Helicase with SNF2 domain 1                                                                                                                   |
| gi296439480 | 1.38  | 3 | 2 | 295.0 | 6.00 | 67.73  | RecName: Full=Centrosomal protein KIAA1731                                                                                                                                                                                                                                     |
| gi24638063  | 4.39  | 3 | 2 | 113.6 | 8.82 | 32.96  | RecName: Full=Putative helicase MOV-10; AltName: Full=Moloney leukemia virus 10 protein                                                                                                                                                                                        |
| gi57015308  | 0.69  | 3 | 2 | 532.1 | 6.40 | 59.92  | RecName: Full=Cytoplasmic dynein 1 heavy chain 1; AltName: Full=Cytoplasmic dynein heavy chain 1; AltName: Full=Dynein heavy chain, cytosolic                                                                                                                                  |
| gi126722969 | 6.95  | 3 | 2 | 60.4  | 6.58 | 30.61  | centromere protein T [Homo sapiens]                                                                                                                                                                                                                                            |
| gi74744979  | 0.77  | 3 | 2 | 573.5 | 6.04 | 139.05 | RecName: Full=E3 ubiquitin-protein ligase UBR4; AltName: Full=600 kDa retinoblastoma protein-associated factor; AltName: Full=N-recogin-4; AltName: Full=Retinoblastoma-associated factor of 600 kDa; Short=RBAF600; Short=p600; AltName: Full=Zinc finger UBR1-type protein 1 |
| gi291167747 | 2.11  | 3 | 2 | 160.0 | 5.19 | 38.92  | ninein isoform 6 [Homo sapiens]                                                                                                                                                                                                                                                |
| gi53759113  | 8.87  | 3 | 2 | 41.9  | 9.38 | 15.15  | beta-1,4-galactosyltransferase 2 isoform b [Homo sapiens]                                                                                                                                                                                                                      |
| gi49065524  | 5.00  | 3 | 2 | 41.1  | 8.56 | 10.98  | DKFZP564O0523 [Homo sapiens]                                                                                                                                                                                                                                                   |
| gi118582286 | 9.55  | 3 | 2 | 54.6  | 6.58 | 15.74  | 6-phosphofructo-2-kinase/fructose-2,6-biphosphatase 1 [Homo sapiens]                                                                                                                                                                                                           |
| gi150421594 | 3.24  | 3 | 2 | 84.0  | 6.25 | 29.92  | RecName: Full=Mitofusin-1; AltName: Full=Fzo homolog; AltName: Full=Transmembrane GTPase MFN1                                                                                                                                                                                  |
| gi10719919  | 4.80  | 3 | 2 | 66.2  | 8.22 | 22.24  | RecName: Full=Zinc finger MYND domain-containing protein 11; AltName: Full=Adenovirus 5 E1A-binding protein; AltName: Full=Protein BS69                                                                                                                                        |
| gi10439767  | 6.01  | 3 | 2 | 37.4  | 9.32 | 27.78  | unnamed protein product [Homo sapiens]                                                                                                                                                                                                                                         |
| gi157836334 | 21.05 | 3 | 2 | 11.8  | 4.56 | 19.02  | Chain A, Structure Of A Novel Bence-Jones Protein (Rhe) Fragment At 1.6 Angstroms Resolution                                                                                                                                                                                   |

|             |       |   |   |       |      |       |                                                                                                                                                                                                                                                                                                                                                                                                                                                                                     |
|-------------|-------|---|---|-------|------|-------|-------------------------------------------------------------------------------------------------------------------------------------------------------------------------------------------------------------------------------------------------------------------------------------------------------------------------------------------------------------------------------------------------------------------------------------------------------------------------------------|
| gi152149150 | 15.89 | 3 | 2 | 23.3  | 8.05 | 14.29 | Chain L, Crystal Structure Of Abt-007 Fab Fragment With The Soluble Domain Of Epo Receptor                                                                                                                                                                                                                                                                                                                                                                                          |
| gi62738926  | 11.52 | 3 | 2 | 49.8  | 4.82 | 16.95 | Chain B, Crystal Structure Of Placental Ribonuclease Inhibitor In Complex With Human Eosinophil Derived Neurotoxin At 2a Resolution                                                                                                                                                                                                                                                                                                                                                 |
| gi1589113   | 4.34  | 3 | 2 | 100.8 | 8.63 | 61.32 | RNA helicase                                                                                                                                                                                                                                                                                                                                                                                                                                                                        |
| gi178882    | 4.36  | 3 | 2 | 98.8  | 6.49 | 23.05 | androgen receptor [Homo sapiens]                                                                                                                                                                                                                                                                                                                                                                                                                                                    |
| gi299976    | 18.64 | 3 | 2 | 13.0  | 9.29 | 22.92 | anti-CMV-infected cells Ig heavy chain {clone GLCMV 2,4,5,13} [human, Peptide, 118 aa]                                                                                                                                                                                                                                                                                                                                                                                              |
| gi158428978 | 5.24  | 3 | 2 | 57.5  | 6.58 | 26.68 | Chain B, Human Cysteine Sulfinic Acid Decarboxylase (Csd) In Complex With Plp.                                                                                                                                                                                                                                                                                                                                                                                                      |
| gi7513171   | 7.44  | 3 | 2 | 53.6  | 9.63 | 21.65 | N-acetylglucosamine-6-O-sulfotransferase (EC 2.8.2.-) - human                                                                                                                                                                                                                                                                                                                                                                                                                       |
| gi2135461   | 16.92 | 3 | 2 | 14.3  | 8.88 | 20.77 | Ig variable region (VDJ) (clone T24-3) - human (fragment)                                                                                                                                                                                                                                                                                                                                                                                                                           |
| gi159164062 | 29.03 | 3 | 2 | 13.2  | 7.42 | 13.73 | Chain A, Solution Structure Of The 7th PdZ Domain Of Inad-Like Protein                                                                                                                                                                                                                                                                                                                                                                                                              |
| gi10439594  | 3.50  | 3 | 2 | 66.2  | 9.36 | 24.49 | unnamed protein product [Homo sapiens]                                                                                                                                                                                                                                                                                                                                                                                                                                              |
| gi7272098   | 8.99  | 3 | 2 | 50.2  | 8.66 | 8.60  | Polynucleotide kinase 3'-phosphatase, partial sequence [Homo sapiens]                                                                                                                                                                                                                                                                                                                                                                                                               |
| gi38258905  | 16.60 | 2 | 2 | 26.4  | 4.79 | 9.34  | RecName: Full=Proteasome subunit alpha type-5; AltName: Full=Macropain zeta chain; AltName: Full=Multicatalytic endopeptidase complex zeta chain; AltName: Full=Proteasome zeta chain                                                                                                                                                                                                                                                                                               |
| gi14210524  | 9.43  | 2 | 2 | 23.3  | 9.11 | 14.96 | bcl-2-related ovarian killer protein [Homo sapiens]                                                                                                                                                                                                                                                                                                                                                                                                                                 |
| gi322510128 | 2.17  | 2 | 2 | 166.9 | 4.92 | 45.35 | RecName: Full=FYVE and coiled-coil domain-containing protein 1; AltName: Full=Zinc finger FYVE domain-containing protein 7                                                                                                                                                                                                                                                                                                                                                          |
| gi145309311 | 1.33  | 2 | 2 | 290.3 | 5.80 | 75.08 | probable ubiquitin carboxyl-terminal hydrolase FAF-X isoform 4 [Homo sapiens]                                                                                                                                                                                                                                                                                                                                                                                                       |
| gi730840    | 4.65  | 2 | 2 | 81.0  | 6.87 | 13.61 | RecName: Full=FACT complex subunit SSRP1; AltName: Full=Chromatin-specific transcription elongation factor 80 kDa subunit; AltName: Full=Facilitates chromatin transcription complex 80 kDa subunit; Short=FACT 80 kDa subunit; Short=FACTp80; AltName: Full=Facilitates chromatin transcription complex subunit SSRP1; AltName: Full=Recombination signal sequence recognition protein 1; AltName: Full=Structure-specific recognition protein 1; Short=hSSRP1; AltName: Full=T160 |
| gi4502247   | 3.74  | 2 | 2 | 104.6 | 6.81 | 24.01 | armadillo repeat protein deleted in velo-cardio-facial syndrome [Homo sapiens]                                                                                                                                                                                                                                                                                                                                                                                                      |
| gi6225804   | 1.62  | 2 | 2 | 240.5 | 5.80 | 82.00 | RecName: Full=Oxygen-regulated protein 1; AltName: Full=Retinitis pigmentosa 1 protein; AltName: Full=Retinitis pigmentosa RP1 protein                                                                                                                                                                                                                                                                                                                                              |
| gi260064013 | 4.90  | 2 | 2 | 51.1  | 6.57 | 14.86 | ribonucleoside-diphosphate reductase subunit M2 isoform 1 [Homo sapiens]                                                                                                                                                                                                                                                                                                                                                                                                            |

|             |       |   |   |       |      |        |                                                                                                                                                                                                                                                                                                                              |
|-------------|-------|---|---|-------|------|--------|------------------------------------------------------------------------------------------------------------------------------------------------------------------------------------------------------------------------------------------------------------------------------------------------------------------------------|
| gi10835218  | 4.50  | 2 | 2 | 112.3 | 8.34 | 23.05  | DNA topoisomerase 3-alpha [Homo sapiens]                                                                                                                                                                                                                                                                                     |
| gi12025678  | 3.51  | 2 | 2 | 104.8 | 5.44 | 45.08  | alpha-actinin-4 [Homo sapiens]                                                                                                                                                                                                                                                                                               |
| gi317373377 | 1.74  | 2 | 2 | 197.9 | 4.94 | 26.79  | RecName: Full=Laminin subunit beta-1; AltName: Full=Laminin B1 chain; AltName: Full=Laminin-1 subunit beta; AltName: Full=Laminin-10 subunit beta; AltName: Full=Laminin-12 subunit beta; AltName: Full=Laminin-2 subunit beta; AltName: Full=Laminin-6 subunit beta; AltName: Full=Laminin-8 subunit beta; Flags: Precursor |
| gi143933639 | 3.97  | 2 | 2 | 86.1  | 5.27 | 7.57   | RecName: Full=Striatin                                                                                                                                                                                                                                                                                                       |
| gi110735435 | 2.52  | 2 | 2 | 172.0 | 6.87 | 32.38  | collagen alpha-3(V) chain preproprotein [Homo sapiens]                                                                                                                                                                                                                                                                       |
| gi110832835 | 1.87  | 2 | 2 | 174.1 | 7.37 | 53.08  | ATP-binding cassette sub-family C member 9 isoform SUR2A [Homo sapiens]                                                                                                                                                                                                                                                      |
| gi27477070  | 1.95  | 2 | 2 | 206.8 | 6.52 | 37.07  | TATA-binding protein-associated factor 172 [Homo sapiens]                                                                                                                                                                                                                                                                    |
| gi13124875  | 1.19  | 2 | 2 | 223.4 | 5.53 | 55.09  | myosin-11 isoform SM2A [Homo sapiens]                                                                                                                                                                                                                                                                                        |
| gi62243696  | 2.62  | 2 | 2 | 144.3 | 5.59 | 20.05  | cohesin subunit SA-1 [Homo sapiens]                                                                                                                                                                                                                                                                                          |
| gi49456655  | 13.68 | 2 | 2 | 31.9  | 9.03 | 16.87  | STAR [Homo sapiens]                                                                                                                                                                                                                                                                                                          |
| gi15812226  | 3.25  | 2 | 2 | 132.2 | 6.74 | 16.27  | transcriptional-regulating factor 1 [Homo sapiens]                                                                                                                                                                                                                                                                           |
| gi218512114 | 1.22  | 2 | 2 | 231.2 | 6.87 | 75.46  | RecName: Full=Phosphatidylinositol 4-kinase alpha; Short=PI4-kinase alpha; Short=PI4K-alpha; Short=PtdIns-4-kinase alpha                                                                                                                                                                                                     |
| gi18699730  | 6.21  | 2 | 2 | 55.5  | 7.69 | 9.82   | monocarboxylate transporter 10 [Homo sapiens]                                                                                                                                                                                                                                                                                |
| gi56549645  | 1.97  | 2 | 2 | 187.1 | 6.51 | 50.09  | nuclear pore complex protein Nup98-Nup96 isoform 4 [Homo sapiens]                                                                                                                                                                                                                                                            |
| gi116242809 | 0.35  | 2 | 2 | 795.9 | 5.36 | 296.01 | RecName: Full=Nesprin-2; AltName: Full=Nuclear envelope spectrin repeat protein 2; AltName: Full=Nucleus and actin connecting element protein; Short=Protein NUANCE; AltName: Full=Synaptic nuclear envelope protein 2; Short=Syne-2                                                                                         |
| gi104294888 | 2.27  | 2 | 2 | 152.7 | 6.30 | 9.86   | vascular endothelial growth factor receptor 3 isoform 1 precursor [Homo sapiens]                                                                                                                                                                                                                                             |
| gi74761953  | 5.21  | 2 | 2 | 83.6  | 6.79 | 8.45   | RecName: Full=Serine/threonine-protein kinase TBK1; AltName: Full=NF-kappa-B-activating kinase; AltName: Full=T2K; AltName: Full=TANK-binding kinase 1                                                                                                                                                                       |
| gi18105007  | 1.39  | 2 | 2 | 242.8 | 6.46 | 63.29  | CAD protein [Homo sapiens]                                                                                                                                                                                                                                                                                                   |
| gi325511382 | 0.68  | 2 | 2 | 551.7 | 5.68 | 81.58  | RecName: Full=Ryanodine receptor 3; Short=RYP-3; Short=RyR3; AltName: Full=Brain ryanodine receptor-calcium release channel; AltName: Full=Brain-type ryanodine receptor                                                                                                                                                     |
| gi7706712   | 8.25  | 2 | 2 | 44.9  | 9.74 | 15.85  | NAD-dependent deacetylase sirtuin-7 [Homo sapiens]                                                                                                                                                                                                                                                                           |
| gi74758241  | 2.57  | 2 | 2 | 151.6 | 5.86 | 14.61  | RecName: Full=Enhancer of mRNA-decapping protein 4; AltName: Full=Autoantigen Ge-1; AltName: Full=Autoantigen RCD-8; AltName: Full=Human enhancer of decapping large subunit; Short=Hedls                                                                                                                                    |

|             |       |   |   |       |       |        |                                                                                                                                                                                                                                                                                           |
|-------------|-------|---|---|-------|-------|--------|-------------------------------------------------------------------------------------------------------------------------------------------------------------------------------------------------------------------------------------------------------------------------------------------|
| gi110735441 | 2.78  | 2 | 2 | 136.1 | 8.63  | 23.58  | A disintegrin and metalloproteinase with thrombospondin motifs 16 preproprotein [Homo sapiens]                                                                                                                                                                                            |
| gi4557627   | 2.28  | 2 | 2 | 75.4  | 7.03  | 25.57  | nucleoporin GLE1 isoform 2 [Homo sapiens]                                                                                                                                                                                                                                                 |
| gi50657187  | 2.36  | 2 | 2 | 159.4 | 6.14  | 61.71  | ICBP90 binding protein 1 [Homo sapiens]                                                                                                                                                                                                                                                   |
| gi100913202 | 2.43  | 2 | 2 | 101.6 | 7.85  | 24.76  | probable ATP-dependent RNA helicase DDX11 isoform 1 [Homo sapiens]                                                                                                                                                                                                                        |
| gi126116596 | 0.95  | 2 | 2 | 409.5 | 10.45 | 101.72 | abnormal spindle-like microcephaly-associated protein isoform 1 [Homo sapiens]                                                                                                                                                                                                            |
| gi115502437 | 2.04  | 2 | 2 | 85.9  | 7.77  | 34.56  | RecName: Full=Polyribonucleotide nucleotidyltransferase 1, mitochondrial; AltName: Full=3'-5' RNA exonuclease OLD35; AltName: Full=PNPase old-35; AltName: Full=Polynucleotide phosphorylase 1; Short=PNPase 1; AltName: Full=Polynucleotide phosphorylase-like protein; Flags: Precursor |
| gi27436873  | 1.69  | 2 | 2 | 190.4 | 7.62  | 48.03  | E3 ubiquitin-protein ligase SHPRH isoform b [Homo sapiens]                                                                                                                                                                                                                                |
| gi156632706 | 3.01  | 2 | 2 | 157.8 | 6.13  | 16.23  | RecName: Full=Leucine-rich PPR motif-containing protein, mitochondrial; AltName: Full=130 kDa leucine-rich protein; Short=LRP 130; AltName: Full=GP130; Flags: Precursor                                                                                                                  |
| gi120042    | 3.28  | 2 | 2 | 68.6  | 5.68  | 6.62   | RecName: Full=Alpha-fetoprotein; AltName: Full=Alpha-1-fetoprotein; AltName: Full=Alpha-fetoglobulin; Flags: Precursor                                                                                                                                                                    |
| gi148877246 | 0.83  | 2 | 2 | 335.7 | 6.34  | 50.52  | RecName: Full=Chromodomain-helicase-DNA-binding protein 7; Short=CHD-7; AltName: Full=ATP-dependent helicase CHD7                                                                                                                                                                         |
| gi317373370 | 0.48  | 2 | 2 | 555.1 | 6.58  | 84.49  | RecName: Full=Uncharacterized protein KIAA1109; AltName: Full=Fragile site-associated protein                                                                                                                                                                                             |
| gi1705571   | 2.78  | 2 | 2 | 139.9 | 6.24  | 38.80  | RecName: Full=Neural cell adhesion molecule L1; Short=N-CAM-L1; Short=NCAM-L1; AltName: CD_antigen=CD171; Flags: Precursor                                                                                                                                                                |
| gi3399676   | 2.96  | 2 | 2 | 151.7 | 6.80  | 33.10  | R31180_1 [Homo sapiens]                                                                                                                                                                                                                                                                   |
| gi4508035   | 4.96  | 2 | 2 | 77.8  | 8.29  | 23.47  | zinc finger protein 7 [Homo sapiens]                                                                                                                                                                                                                                                      |
| gi349585060 | 2.80  | 2 | 2 | 80.2  | 5.90  | 26.30  | disabled homolog 2 isoform 2 [Homo sapiens]                                                                                                                                                                                                                                               |
| gi74725312  | 2.56  | 2 | 2 | 164.6 | 8.47  | 31.11  | RecName: Full=Sister chromatid cohesion protein PDS5 homolog B; AltName: Full=Androgen-induced proliferation inhibitor; AltName: Full=Androgen-induced prostate proliferative shutoff-associated protein AS3                                                                              |
| gi312597501 | 19.46 | 2 | 2 | 24.7  | 7.02  | 26.47  | Chain D, Human Steroidogenic Acute Regulatory Protein                                                                                                                                                                                                                                     |
| gi239781915 | 10.36 | 2 | 2 | 28.0  | 6.84  | 4.68   | Chain B, Crystal Structure Of The Catalytic Region Of Human Masp-1                                                                                                                                                                                                                        |
| gi42543302  | 8.19  | 2 | 2 | 53.9  | 8.59  | 23.17  | Chain B, Crystal Structure Of Human Drug Metabolizing Cytochrome P450 2c8                                                                                                                                                                                                                 |
| gi257299    | 31.19 | 2 | 2 | 12.0  | 9.79  | 7.74   | immunoglobulin light chain variable=anti-HIV-1 gp120 Fab [human, clone hiv4, Peptide Partial, 109 aa]                                                                                                                                                                                     |

|             |       |   |   |       |      |       |                                                                                                              |
|-------------|-------|---|---|-------|------|-------|--------------------------------------------------------------------------------------------------------------|
| gi3318951   | 15.75 | 2 | 2 | 16.1  | 8.63 | 14.45 | Chain F, Human Embryonic Gower Ii Carbonmonoxy Hemoglobin                                                    |
| gi50513261  | 8.73  | 2 | 2 | 43.3  | 7.53 | 10.22 | Chain A, Crystal Structure Of The Aminoacylation Catalytic Fragment Of Human Tryptophanyl-Trna Synthetase    |
| gi134104889 | 8.00  | 2 | 2 | 49.6  | 4.94 | 10.04 | Chain B, C-Terminal Domain Of Influenza A Virus Polymerase Pb2 Subunit In Complex With Human Importin Alpha5 |
| gi4389513   | 1.53  | 2 | 2 | 170.0 | 6.99 | 40.20 | Human homolog of Mus musculus wizL protein [AA 4-1561] [Homo sapiens]                                        |
| gi631089    | 1.82  | 2 | 2 | 199.2 | 9.33 | 31.22 | MHC class III histocompatibility antigen HLA-B-associated protein 2 [similarity] - human                     |
| gi87805     | 17.69 | 2 | 2 | 16.3  | 5.48 | 13.69 | Ig heavy chain precursor V-D-J region (JP-FL-6) - human                                                      |
| gi92096004  | 2.48  | 2 | 2 | 167.7 | 6.57 | 53.40 | PB1 protein [Homo sapiens]                                                                                   |
| gi10437137  | 14.56 | 2 | 2 | 35.7  | 7.17 | 9.33  | unnamed protein product [Homo sapiens]                                                                       |
